# Supplementary material for: Uncertainty of the hourly average concentration values derived fromnon-continuous measurements
Source: Copernicus journal article supplement (doi:10.5194/amt-2020-409), 2020-11-09
Supplement: Supplementary file 1 [file Haszpra-Pracser_Supplementary_figures.xlsx]

## Sheet: ToC
TABLE OF CONTENT
Fig. S1:	Deviation of the measured concentration from the nominal concentration of Standard2 as a function of time after switching from Standard1 to Standard2
Fig. S2:	Distribution of the deviation of the measured concentration values from the true values as the function of the number of the intakes and the length of the sampling periods (whole year)
Fig. S3:	Median values of the absolute deviations of the estimated hourly average concentration values (arithmetic average) from the true concentration values as the function of the number of the intakes, month, and time of the day
Fig. S4:	90-percentile values of the absolute deviations of the estimated hourly average concentration values (arithmetic average) from the true concentration values as the function of the number of the intakes, month, and time of the day
Fig. S5:	Median values of the absolute deviations of the estimated hourly average concentration values (linear interpolation) from the true concentration values as the function of the number of the intakes, month, and time of the day
Fig. S6:	90-percentile values of the absolute deviations of the estimated hourly average concentration values (linear interpolation) from the true concentration values as the function of the number of the intakes, month, and time of the day
Fig. S7:	Median values of the absolute deviations of the estimated hourly average concentration values (spline interpolation) from the true concentration values as the function of the number of the intakes, month, and time of the day
Fig. S8:	90-percentile values of the absolute deviations of the estimated hourly average concentration values (spline interpolation) from the true concentration values as the function of the number of the intakes, month, and time of the day

## Sheet: FigS1
time (s)	401.77 ppm -> 444.63 ppm	444.63 ppm -> 369.11 ppm
0	-42.9197	75.5187
5	-41.4848	65.1604
10	-8.54613	9.80189
15	-1.76865	0.819335
20	-0.527307	0.238603
25	-0.343644	0.0644075
30	-0.257991	0.0415851
35	-0.146961	-0.0215759
40	-0.142075	-0.000152872
45	-0.0995463	-0.00866317
50	-0.0703505	0.00350832
55	-0.0503646	0.00518232
60	-0.0380393	0.015108
65	-0.0127512	0.0288747
70	-0.0262219	0.0251134
75	-0.0151702	0.0227508
80	0.00756288	0.0089998
85	-0.0323298	0.00586776
90	-0.0105451	0.017144
95	-0.00540806	0.0469667
100	-0.026886	0.000866038
105	0.0252127	0.0217328
110	0.0258623	0.0406027
115	0.00479291	0.0059697
120	-0.0196078	0.0282602
125	0.019124	-0.00487816
130	-0.0137236	-0.0138889
135	0.0246334	0.0126582
140	0.0222845	0.00438633
145	0.0267629	-0.00978696
150	0.0201191	0.00899754
155	0.00452217	-0.00904412
160	0.0140551	0.00153446
165	-0.0157842	-0.00402764
170	-0.00873203	-0.00204734
175	-0.0299276	0.00557456
180	-0.00239894	0.0207066
185	-0.00216783	0.0210014
190	-0.00107612	0.00417114
195	0.00710629	-0.000697752
200	-0.00418014	0.0149563
205	-0.0139155	0.0326107
210	-0.00117845	0.00987088
215	0.0308519	0.0387782
220	0.0244834	-0.00192623
225	0.026072	0.0263223
230	0.0295341	0.0266705
235	0.011873	0.00388064
240	0.0171816	-0.0104128
245	0.0224569	0.0078965
250	0.0311576	-0.0191457
255	0.00760821	-0.00897992
260	0.0138635	-0.0117431
265	-0.0118726	0.0119144
270	0.0118203	-0.0157899
275	0.0223075	0.01503
280	-0.00828028	-0.0130522
285	0.000896456	0.00670837
290	0.00363784	0.0105165
295	0.0357664	-0.012453
300	0.0320169	-0.00790862
305	0.0301333	-0.0155186
310	0.0246853	-0.00836719
315	0.0226264	0.0080693
320	0.00909054	-0.0101021
325	0.0281369	0.00783895
330	0.0100626	-0.0211268
335	0.0275583	-0.0194901
340	0.00878173	-0.0113898
345	3.60158e-05	-0.0150435
350	0.0288158	-0.00928919
355	0.0185788	-0.0299108
360	0.0194758	-0.015564
365	0.0266242	-0.0205287
370	0.00232409	0.000933348
375	0.0271325	-0.0201539
380	-0.0293351	-0.0108454
385	0.00772777	-0.00793631
390	0.00348045	-0.00755934
395	-0.0336659	0.00325738
400	0.00199936	-0.0102815
405	0.00880051	0.0141273
410	-0.0140777	-0.0156982
415	0.00161018	-0.00406261
420	-0.0144526	-0.00729567
425	0.00504593	0.0125218
430	-0.0117486	-0.00363942
435	-0.00806284	0.00781363
440	-0.00377689	-0.00154122
445	0.00380296	0.00233932
450	-0.0137672	0.01933
455	0.0205228	0.00113039
460	0.0321615	0.00838024
465	0.00808428	-0.0112919
470	-0.0194195	-0.0236845

## Sheet: FigS2
																													2 intakes		100 s	2 intakes		120 s	2 intakes		150 s	2 intakes		180 s	2 intakes		200 s	2 intakes		225 s	2 intakes		300 s
																												-1	-1.002	0	0.009	-0.998	0	0.01	-0.997	0.009	0.011	-1.005	0	0.012	-1.001	0.026	0.013	-1.003	0	0.014	-0.998	0.009	0.018
																												-0.99	-0.994	0.009	0.009	-0.988	0	0.01	-0.992	0	0.011	-0.995	0	0.012	-0.989	0	0.013	-0.996	0.009	0.014	-0.99	0	0.018
																												-0.98	-0.982	0.009	0.01	-0.978	0	0.01	-0.982	0	0.011	-0.985	0	0.013	-0.978	0.009	0.013	-0.986	0.009	0.014	-0.982	0.017	0.018
																												-0.97	-0.972	0	0.01	-0.968	0	0.01	-0.972	0	0.012	-0.975	0	0.013	-0.969	0	0.014	-0.968	0.009	0.015	-0.97	0	0.019
																												-0.96	-0.962	0	0.01	-0.958	0.017	0.011	-0.965	0.017	0.012	-0.965	0.017	0.013	-0.96	0.009	0.014	-0.961	0.009	0.015	-0.961	0.026	0.019
																												-0.95	-0.952	0	0.01	-0.948	0	0.011	-0.95	0.009	0.012	-0.955	0	0.013	-0.952	0.009	0.014	-0.95	0.009	0.015	-0.954	0.017	0.019
																												-0.94	-0.942	0	0.01	-0.938	0	0.011	-0.939	0.009	0.012	-0.945	0	0.014	-0.934	0.009	0.015	-0.943	0	0.016	-0.941	0.017	0.02
																												-0.93	-0.932	0	0.011	-0.928	0	0.011	-0.93	0.017	0.013	-0.937	0.009	0.014	-0.925	0.009	0.015	-0.931	0.017	0.016	-0.929	0.017	0.02
																												-0.92	-0.922	0.017	0.011	-0.918	0.009	0.011	-0.922	0	0.013	-0.925	0	0.014	-0.922	0.009	0.015	-0.925	0.009	0.016	-0.92	0	0.021
																												-0.91	-0.912	0	0.011	-0.908	0	0.012	-0.916	0.017	0.013	-0.912	0.009	0.015	-0.909	0.034	0.016	-0.917	0.009	0.017	-0.908	0.017	0.021
																												-0.9	-0.902	0	0.011	-0.894	0.009	0.012	-0.902	0	0.013	-0.908	0.009	0.015	-0.899	0	0.016	-0.903	0	0.017	-0.901	0.017	0.022
																												-0.89	-0.892	0	0.012	-0.888	0	0.012	-0.891	0.017	0.014	-0.895	0	0.015	-0.888	0.017	0.016	-0.893	0	0.017	-0.89	0.017	0.022
																												-0.88	-0.882	0	0.012	-0.878	0.009	0.013	-0.882	0.017	0.014	-0.885	0	0.016	-0.877	0.009	0.017	-0.883	0.009	0.018	-0.883	0.009	0.023
																												-0.87	-0.874	0.017	0.012	-0.868	0	0.013	-0.872	0.017	0.014	-0.875	0	0.016	-0.864	0.009	0.017	-0.869	0.009	0.018	-0.87	0.026	0.023
																												-0.86	-0.86	0.009	0.012	-0.856	0.017	0.013	-0.862	0	0.015	-0.863	0.017	0.016	-0.859	0	0.017	-0.863	0	0.019	-0.861	0.034	0.024
																												-0.85	-0.852	0	0.013	-0.845	0.009	0.014	-0.855	0.009	0.015	-0.856	0.026	0.017	-0.849	0	0.018	-0.853	0	0.019	-0.846	0.026	0.025
																												-0.84	-0.842	0	0.013	-0.837	0.017	0.014	-0.842	0	0.015	-0.845	0	0.017	-0.839	0	0.018	-0.845	0.043	0.019	-0.84	0.017	0.025
																												-0.83	-0.829	0.009	0.013	-0.828	0.017	0.014	-0.832	0	0.016	-0.835	0	0.017	-0.83	0.017	0.019	-0.833	0	0.02	-0.83	0	0.026
																												-0.82	-0.826	0.009	0.014	-0.817	0.017	0.014	-0.822	0	0.016	-0.825	0	0.018	-0.818	0.017	0.019	-0.824	0.026	0.02	-0.82	0	0.026
																												-0.81	-0.814	0.026	0.014	-0.812	0.017	0.015	-0.814	0.017	0.016	-0.812	0.009	0.018	-0.812	0.026	0.02	-0.811	0.043	0.021	-0.808	0.026	0.027
																												-0.8	-0.802	0	0.014	-0.799	0.017	0.015	-0.797	0.009	0.017	-0.805	0.017	0.019	-0.799	0	0.02	-0.803	0	0.022	-0.8	0.06	0.027
																												-0.79	-0.792	0	0.015	-0.788	0	0.016	-0.792	0	0.017	-0.795	0.026	0.019	-0.786	0.026	0.021	-0.794	0.017	0.022	-0.792	0.017	0.028
																												-0.78	-0.782	0	0.015	-0.778	0	0.016	-0.777	0.009	0.018	-0.785	0.026	0.02	-0.779	0	0.021	-0.783	0.017	0.023	-0.78	0.017	0.029
																												-0.77	-0.772	0	0.015	-0.767	0.017	0.016	-0.772	0	0.018	-0.775	0	0.02	-0.772	0.009	0.022	-0.774	0.017	0.023	-0.771	0.009	0.03
																												-0.76	-0.762	0	0.016	-0.758	0	0.017	-0.762	0.017	0.019	-0.767	0.009	0.021	-0.759	0	0.022	-0.762	0.034	0.024	-0.76	0.034	0.03
																												-0.75	-0.752	0.043	0.016	-0.748	0.009	0.017	-0.752	0.009	0.019	-0.756	0.026	0.021	-0.747	0.026	0.023	-0.753	0.017	0.025	-0.75	0.06	0.031
																												-0.74	-0.742	0	0.017	-0.738	0	0.018	-0.739	0.009	0.02	-0.747	0.043	0.022	-0.742	0.009	0.023	-0.744	0.017	0.025	-0.74	0.069	0.032
																												-0.73	-0.736	0.009	0.017	-0.728	0	0.018	-0.732	0	0.02	-0.738	0.009	0.022	-0.725	0.009	0.024	-0.733	0.009	0.026	-0.729	0.009	0.033
																												-0.72	-0.721	0.017	0.018	-0.721	0.009	0.019	-0.721	0.034	0.021	-0.725	0.017	0.023	-0.715	0.009	0.025	-0.721	0.017	0.027	-0.721	0.043	0.034
																												-0.71	-0.716	0.009	0.018	-0.709	0.009	0.019	-0.712	0.009	0.022	-0.712	0.026	0.024	-0.709	0	0.026	-0.712	0.034	0.027	-0.715	0.009	0.034
																												-0.7	-0.702	0	0.019	-0.698	0	0.02	-0.699	0.009	0.022	-0.71	0.009	0.024	-0.699	0.009	0.026	-0.705	0.034	0.028	-0.7	0.026	0.036
																												-0.69	-0.692	0	0.019	-0.685	0.017	0.021	-0.688	0.017	0.023	-0.699	0.009	0.025	-0.687	0.009	0.027	-0.695	0.017	0.029	-0.691	0.034	0.037
																												-0.68	-0.684	0.009	0.02	-0.683	0.009	0.021	-0.682	0.026	0.023	-0.685	0.052	0.026	-0.68	0.017	0.028	-0.686	0.034	0.03	-0.679	0.017	0.038
																												-0.67	-0.673	0.009	0.02	-0.668	0.017	0.022	-0.671	0.009	0.024	-0.673	0.026	0.027	-0.67	0.026	0.029	-0.672	0.043	0.031	-0.672	0.034	0.039
																												-0.66	-0.664	0.026	0.021	-0.658	0	0.022	-0.661	0.017	0.025	-0.663	0.026	0.028	-0.658	0.017	0.03	-0.663	0.052	0.032	-0.659	0.034	0.04
																												-0.65	-0.652	0	0.022	-0.648	0.009	0.023	-0.654	0.034	0.025	-0.656	0.017	0.028	-0.647	0.026	0.031	-0.652	0.026	0.033	-0.65	0.017	0.041
																												-0.64	-0.641	0.026	0.022	-0.64	0.034	0.024	-0.644	0.034	0.026	-0.642	0.034	0.029	-0.64	0.017	0.031	-0.643	0.009	0.034	-0.64	0.069	0.043
																												-0.63	-0.631	0.009	0.023	-0.632	0.009	0.024	-0.628	0.017	0.028	-0.633	0.009	0.03	-0.631	0.017	0.032	-0.634	0.034	0.035	-0.631	0.043	0.044
																												-0.62	-0.626	0.009	0.023	-0.618	0	0.025	-0.619	0.009	0.028	-0.624	0.017	0.031	-0.623	0.017	0.033	-0.623	0.043	0.036	-0.618	0.052	0.046
																												-0.61	-0.614	0.017	0.024	-0.607	0.043	0.026	-0.614	0.009	0.029	-0.618	0.043	0.032	-0.611	0.034	0.034	-0.613	0.034	0.037	-0.611	0.086	0.047
																												-0.6	-0.602	0	0.025	-0.602	0.009	0.027	-0.604	0.017	0.03	-0.605	0	0.033	-0.602	0.009	0.035	-0.603	0.026	0.038	-0.6	0.06	0.049
																												-0.59	-0.592	0.026	0.026	-0.59	0.017	0.028	-0.59	0.034	0.031	-0.594	0.026	0.034	-0.588	0.034	0.037	-0.594	0.052	0.039	-0.59	0.034	0.05
																												-0.58	-0.582	0.034	0.027	-0.58	0.034	0.029	-0.583	0.034	0.032	-0.586	0.069	0.035	-0.579	0.017	0.038	-0.582	0.017	0.041	-0.579	0.034	0.052
																												-0.57	-0.57	0.026	0.028	-0.567	0.026	0.03	-0.571	0.026	0.033	-0.576	0.034	0.037	-0.571	0.009	0.039	-0.572	0.069	0.042	-0.569	0.043	0.054
																												-0.56	-0.562	0.034	0.029	-0.557	0.052	0.031	-0.561	0.026	0.035	-0.568	0.034	0.038	-0.557	0.034	0.041	-0.563	0.034	0.044	-0.559	0.052	0.056
																												-0.55	-0.552	0.043	0.03	-0.546	0.034	0.032	-0.553	0.026	0.036	-0.555	0.026	0.039	-0.549	0.052	0.043	-0.555	0.06	0.045	-0.551	0.06	0.058
																												-0.54	-0.545	0.017	0.031	-0.537	0.043	0.033	-0.54	0.043	0.037	-0.545	0.052	0.041	-0.539	0.069	0.044	-0.541	0.043	0.047	-0.54	0.052	0.06
																												-0.53	-0.528	0.009	0.033	-0.53	0.026	0.034	-0.532	0.069	0.038	-0.534	0.052	0.043	-0.528	0.052	0.046	-0.534	0.052	0.049	-0.531	0.103	0.062
																												-0.52	-0.526	0.009	0.033	-0.516	0.043	0.036	-0.521	0.034	0.04	-0.525	0.086	0.044	-0.519	0.052	0.048	-0.523	0.052	0.051	-0.521	0.086	0.064
																												-0.51	-0.515	0.017	0.035	-0.508	0.043	0.037	-0.51	0.009	0.042	-0.519	0.009	0.045	-0.509	0.026	0.049	-0.514	0.034	0.053	-0.51	0.086	0.067
																												-0.5	-0.504	0.017	0.036	-0.498	0.043	0.039	-0.503	0.026	0.043	-0.506	0.009	0.047	-0.499	0.086	0.052	-0.504	0.086	0.055	-0.499	0.086	0.07
																												-0.49	-0.49	0.017	0.038	-0.485	0.052	0.041	-0.492	0.052	0.045	-0.494	0.034	0.05	-0.49	0.06	0.053	-0.492	0.043	0.057	-0.49	0.086	0.073
																												-0.48	-0.48	0.026	0.04	-0.478	0.026	0.042	-0.479	0.034	0.047	-0.483	0.086	0.052	-0.476	0.034	0.057	-0.482	0.069	0.06	-0.479	0.052	0.076
																												-0.47	-0.471	0.077	0.041	-0.471	0.034	0.044	-0.47	0.06	0.049	-0.475	0.026	0.054	-0.469	0.052	0.058	-0.474	0.086	0.062	-0.47	0.069	0.079
																												-0.46	-0.463	0.034	0.043	-0.459	0.052	0.046	-0.461	0.077	0.051	-0.466	0.052	0.056	-0.46	0.095	0.061	-0.464	0.095	0.064	-0.459	0.095	0.082
																												-0.45	-0.452	0.017	0.045	-0.448	0.043	0.048	-0.452	0.112	0.053	-0.456	0.06	0.058	-0.448	0.052	0.064	-0.451	0.043	0.068	-0.45	0.112	0.086
																												-0.44	-0.444	0.034	0.047	-0.437	0.052	0.051	-0.442	0.129	0.056	-0.447	0.06	0.061	-0.44	0.043	0.066	-0.442	0.103	0.071	-0.44	0.164	0.09
																												-0.43	-0.435	0.034	0.049	-0.427	0.043	0.053	-0.432	0.06	0.058	-0.435	0.043	0.064	-0.427	0.06	0.07	-0.433	0.112	0.074	-0.43	0.086	0.094
																												-0.42	-0.423	0.043	0.051	-0.418	0.043	0.055	-0.423	0.052	0.061	-0.425	0.095	0.067	-0.419	0.069	0.073	-0.424	0.043	0.077	-0.418	0.103	0.099
																												-0.41	-0.412	0.034	0.054	-0.408	0.069	0.058	-0.413	0.077	0.064	-0.415	0.103	0.07	-0.409	0.086	0.076	-0.414	0.06	0.08	-0.41	0.103	0.103
																												-0.4	-0.403	0.043	0.057	-0.399	0.043	0.06	-0.402	0.086	0.067	-0.404	0.069	0.074	-0.399	0.103	0.08	-0.402	0.103	0.085	-0.4	0.103	0.108
																												-0.39	-0.394	0.034	0.059	-0.388	0.06	0.064	-0.391	0.095	0.071	-0.395	0.112	0.078	-0.389	0.138	0.084	-0.393	0.112	0.089	-0.389	0.172	0.114
																												-0.38	-0.383	0.069	0.062	-0.379	0.069	0.067	-0.381	0.069	0.075	-0.386	0.112	0.081	-0.379	0.146	0.089	-0.382	0.121	0.094	-0.38	0.172	0.12
																												-0.37	-0.371	0.077	0.066	-0.368	0.095	0.071	-0.371	0.052	0.079	-0.375	0.121	0.086	-0.368	0.146	0.094	-0.372	0.103	0.1	-0.37	0.164	0.126
																												-0.36	-0.361	0.069	0.07	-0.358	0.069	0.075	-0.362	0.06	0.082	-0.365	0.129	0.091	-0.358	0.129	0.099	-0.362	0.121	0.105	-0.359	0.155	0.134
																												-0.35	-0.352	0.069	0.074	-0.348	0.146	0.079	-0.352	0.146	0.087	-0.355	0.138	0.095	-0.349	0.189	0.104	-0.352	0.155	0.111	-0.349	0.215	0.141
																												-0.34	-0.341	0.069	0.079	-0.337	0.129	0.084	-0.342	0.146	0.092	-0.345	0.112	0.101	-0.339	0.138	0.111	-0.343	0.155	0.117	-0.339	0.129	0.15
																												-0.33	-0.331	0.121	0.083	-0.328	0.095	0.089	-0.332	0.017	0.098	-0.336	0.146	0.107	-0.33	0.189	0.117	-0.333	0.181	0.124	-0.331	0.138	0.157
																												-0.32	-0.322	0.121	0.088	-0.318	0.103	0.095	-0.322	0.06	0.104	-0.326	0.189	0.113	-0.32	0.112	0.124	-0.323	0.181	0.131	-0.321	0.138	0.166
																												-0.31	-0.311	0.146	0.094	-0.308	0.129	0.101	-0.311	0.121	0.111	-0.314	0.146	0.121	-0.309	0.164	0.133	-0.312	0.198	0.14	-0.31	0.164	0.178
																												-0.3	-0.301	0.164	0.101	-0.297	0.215	0.108	-0.302	0.181	0.118	-0.305	0.224	0.129	-0.299	0.121	0.142	-0.303	0.258	0.149	-0.299	0.276	0.19
																												-0.29	-0.292	0.155	0.107	-0.289	0.138	0.115	-0.292	0.155	0.126	-0.295	0.172	0.138	-0.29	0.207	0.151	-0.292	0.181	0.16	-0.289	0.198	0.203
																												-0.28	-0.281	0.086	0.115	-0.278	0.198	0.124	-0.281	0.155	0.136	-0.286	0.224	0.147	-0.278	0.224	0.163	-0.283	0.215	0.17	-0.28	0.31	0.216
																												-0.27	-0.271	0.112	0.124	-0.268	0.146	0.133	-0.271	0.207	0.146	-0.275	0.155	0.158	-0.269	0.284	0.174	-0.273	0.215	0.182	-0.27	0.284	0.232
																												-0.26	-0.262	0.164	0.132	-0.258	0.207	0.144	-0.261	0.189	0.157	-0.266	0.276	0.169	-0.259	0.31	0.188	-0.263	0.207	0.197	-0.259	0.344	0.251
																												-0.25	-0.252	0.155	0.144	-0.248	0.198	0.156	-0.252	0.241	0.168	-0.255	0.181	0.184	-0.248	0.232	0.204	-0.253	0.284	0.212	-0.251	0.413	0.268
																												-0.24	-0.24	0.155	0.158	-0.238	0.189	0.168	-0.241	0.344	0.185	-0.246	0.293	0.197	-0.238	0.344	0.221	-0.243	0.362	0.229	-0.239	0.353	0.292
																												-0.23	-0.232	0.215	0.169	-0.228	0.301	0.183	-0.232	0.258	0.199	-0.234	0.301	0.216	-0.229	0.37	0.239	-0.233	0.413	0.248	-0.231	0.387	0.314
																												-0.22	-0.222	0.293	0.184	-0.218	0.31	0.2	-0.222	0.396	0.216	-0.226	0.362	0.233	-0.219	0.327	0.261	-0.223	0.405	0.27	-0.22	0.405	0.344
																												-0.21	-0.213	0.275	0.2	-0.207	0.319	0.222	-0.211	0.396	0.238	-0.215	0.43	0.256	-0.209	0.344	0.284	-0.213	0.396	0.295	-0.21	0.405	0.375
																												-0.2	-0.202	0.25	0.222	-0.198	0.258	0.242	-0.202	0.387	0.259	-0.205	0.301	0.28	-0.198	0.327	0.315	-0.203	0.431	0.324	-0.2	0.594	0.411
																												-0.19	-0.191	0.405	0.247	-0.189	0.387	0.266	-0.191	0.379	0.29	-0.195	0.37	0.31	-0.19	0.396	0.343	-0.193	0.327	0.355	-0.19	0.568	0.45
																												-0.18	-0.182	0.396	0.272	-0.178	0.43	0.297	-0.182	0.439	0.318	-0.185	0.387	0.34	-0.179	0.508	0.382	-0.182	0.474	0.396	-0.18	0.611	0.5
																												-0.17	-0.172	0.37	0.303	-0.168	0.542	0.333	-0.172	0.43	0.355	-0.175	0.56	0.379	-0.169	0.689	0.429	-0.172	0.551	0.442	-0.17	0.706	0.553
																												-0.16	-0.162	0.542	0.341	-0.158	0.43	0.373	-0.162	0.646	0.4	-0.165	0.482	0.426	-0.158	0.62	0.484	-0.163	0.603	0.488	-0.16	0.689	0.616
																												-0.15	-0.152	0.525	0.384	-0.147	0.482	0.428	-0.151	0.585	0.453	-0.155	0.758	0.479	-0.149	0.74	0.544	-0.153	0.697	0.553	-0.15	0.921	0.693
																												-0.14	-0.142	0.732	0.439	-0.138	0.697	0.488	-0.142	0.706	0.513	-0.145	0.672	0.542	-0.139	0.775	0.616	-0.143	0.835	0.621	-0.14	0.956	0.782
																												-0.13	-0.131	0.706	0.51	-0.128	0.732	0.564	-0.132	0.749	0.588	-0.135	0.74	0.622	-0.129	0.723	0.707	-0.133	0.792	0.714	-0.13	0.878	0.889
																												-0.12	-0.122	1.016	0.591	-0.118	0.766	0.648	-0.122	0.809	0.68	-0.126	0.706	0.707	-0.119	0.982	0.821	-0.123	0.835	0.818	-0.119	1.007	1.02
																												-0.11	-0.112	1.016	0.691	-0.108	0.818	0.772	-0.112	0.999	0.8	-0.115	0.964	0.827	-0.109	1.025	0.957	-0.113	1.05	0.948	-0.11	1.205	1.167
																												-0.1	-0.102	0.93	0.825	-0.097	1.085	0.932	-0.101	0.999	0.955	-0.105	0.956	0.983	-0.099	1.119	1.127	-0.103	1.326	1.118	-0.1	1.403	1.354
																												-0.09	-0.092	1.326	0.996	-0.088	1.429	1.117	-0.091	1.334	1.145	-0.095	1.18	1.158	-0.089	1.481	1.351	-0.093	1.524	1.315	-0.09	1.688	1.586
																												-0.08	-0.082	1.541	1.221	-0.078	1.601	1.379	-0.081	1.894	1.405	-0.084	1.489	1.419	-0.079	1.748	1.635	-0.083	1.662	1.588	-0.08	2.075	1.865
																												-0.07	-0.072	1.722	1.532	-0.068	2.04	1.75	-0.072	1.705	1.734	-0.075	1.911	1.72	-0.069	2.118	2.028	-0.073	1.894	1.933	-0.07	1.989	2.22
																												-0.06	-0.061	2.075	1.998	-0.058	2.307	2.275	-0.062	2.083	2.187	-0.065	2.195	2.149	-0.059	2.394	2.533	-0.063	2.058	2.388	-0.06	2.428	2.666
																												-0.05	-0.052	2.54	2.619	-0.048	2.85	2.971	-0.052	2.755	2.846	-0.055	2.712	2.722	-0.049	3.263	3.21	-0.053	2.971	2.945	-0.05	2.773	3.193
																												-0.04	-0.042	3.289	3.57	-0.038	3.788	4.078	-0.041	3.461	3.771	-0.045	3.315	3.5	-0.039	3.53	4.115	-0.043	3.461	3.714	-0.039	3.487	3.824
																												-0.03	-0.032	4.52	4.982	-0.028	4.838	5.73	-0.032	5.036	5.032	-0.035	3.969	4.55	-0.029	4.736	5.197	-0.033	4.107	4.614	-0.03	4.658	4.458
																												-0.02	-0.021	6.267	7.097	-0.018	7.886	7.807	-0.021	5.441	6.685	-0.025	5.82	5.857	-0.019	6.053	6.443	-0.023	5.373	5.726	-0.02	5.166	5.092
																												-0.01	-0.011	9.022	9.491	-0.008	9.857	9.821	-0.012	8.17	8.338	-0.015	7.146	7.231	-0.009	8.214	7.499	-0.013	6.931	6.68	-0.01	5.829	5.562
																												0	-0.002	11.983	10.941	0.002	11.071	10.416	-0.002	10.098	9.258	-0.005	8.799	8.187	0.001	7.853	7.844	-0.003	7.525	7.229	0	5.726	5.741
																												0.01	0.008	10.055	10.245	0.012	8.523	9.101	0.008	8.945	8.802	0.005	8.222	8.175	0.011	7.25	7.318	0.007	7.121	7.093	0.01	5.907	5.556
																												0.02	0.018	7.283	8.015	0.022	6.5	6.971	0.018	6.904	7.279	0.015	6.965	7.215	0.021	6.242	6.23	0.017	6.604	6.332	0.02	4.934	5.07
																												0.03	0.028	5.303	5.68	0.032	4.451	5.006	0.028	5.105	5.571	0.025	5.372	5.837	0.031	4.598	4.978	0.027	4.693	5.273	0.03	3.961	4.439
																												0.04	0.038	4.106	4.074	0.042	3.375	3.627	0.038	3.84	4.161	0.035	4.081	4.547	0.041	3.909	3.918	0.037	4.012	4.237	0.04	3.702	3.788
																												0.05	0.048	2.893	2.968	0.052	2.565	2.675	0.048	3.134	3.134	0.045	3.53	3.503	0.051	2.902	3.066	0.047	3.151	3.392	0.05	3.074	3.17
																												0.06	0.058	2.152	2.2	0.062	2.092	2.048	0.058	2.522	2.396	0.055	2.574	2.715	0.061	2.48	2.43	0.057	2.669	2.712	0.06	2.729	2.639
																												0.07	0.068	1.765	1.692	0.072	1.877	1.587	0.068	1.894	1.872	0.065	2.213	2.136	0.071	1.972	1.93	0.067	2.084	2.185	0.07	2.239	2.207
																												0.08	0.078	1.438	1.335	0.082	1.515	1.273	0.078	1.799	1.506	0.075	1.963	1.729	0.081	1.464	1.573	0.077	1.731	1.778	0.08	1.843	1.867
																												0.09	0.088	1.291	1.079	0.091	1.016	1.043	0.088	1.446	1.212	0.085	1.584	1.401	0.091	1.455	1.305	0.087	1.739	1.473	0.09	1.584	1.571
																												0.1	0.098	1.007	0.888	0.102	1.119	0.85	0.098	1.188	1.018	0.095	1.309	1.157	0.101	1.076	1.085	0.097	1.317	1.229	0.1	1.24	1.348
																												0.11	0.108	0.887	0.74	0.112	0.999	0.718	0.108	1.067	0.848	0.105	0.999	0.978	0.111	0.982	0.927	0.107	1.231	1.035	0.11	1.283	1.156
																												0.12	0.118	0.723	0.626	0.122	0.844	0.614	0.119	0.766	0.713	0.114	0.93	0.839	0.121	0.844	0.798	0.117	1.05	0.898	0.12	1.223	1.006
																												0.13	0.128	0.637	0.537	0.131	0.663	0.534	0.128	0.577	0.619	0.124	0.749	0.724	0.131	0.87	0.689	0.127	0.964	0.777	0.13	0.964	0.884
																												0.14	0.138	0.56	0.464	0.142	0.663	0.458	0.139	0.542	0.536	0.135	0.956	0.618	0.141	0.93	0.602	0.137	0.913	0.675	0.14	0.913	0.776
																												0.15	0.147	0.56	0.409	0.152	0.499	0.405	0.149	0.517	0.467	0.145	0.525	0.541	0.151	0.542	0.526	0.147	0.603	0.593	0.15	0.715	0.69
																												0.16	0.158	0.482	0.359	0.162	0.387	0.356	0.158	0.551	0.415	0.155	0.628	0.479	0.161	0.629	0.467	0.157	0.62	0.527	0.16	0.784	0.614
																												0.17	0.168	0.353	0.317	0.172	0.362	0.317	0.168	0.448	0.373	0.165	0.474	0.423	0.171	0.517	0.417	0.167	0.646	0.468	0.17	0.637	0.551
																												0.18	0.177	0.353	0.285	0.182	0.267	0.286	0.179	0.491	0.33	0.174	0.56	0.382	0.181	0.456	0.375	0.177	0.534	0.42	0.18	0.689	0.497
																												0.19	0.187	0.379	0.257	0.191	0.319	0.258	0.189	0.301	0.297	0.185	0.379	0.342	0.191	0.491	0.337	0.186	0.491	0.38	0.191	0.474	0.447
																												0.2	0.198	0.327	0.23	0.202	0.284	0.232	0.199	0.301	0.269	0.195	0.362	0.31	0.201	0.37	0.307	0.196	0.422	0.344	0.2	0.448	0.408
																												0.21	0.208	0.224	0.209	0.212	0.25	0.212	0.208	0.37	0.246	0.205	0.284	0.28	0.212	0.284	0.277	0.207	0.284	0.312	0.211	0.56	0.371
																												0.22	0.218	0.241	0.19	0.222	0.224	0.193	0.219	0.241	0.222	0.215	0.344	0.255	0.221	0.336	0.256	0.218	0.344	0.283	0.22	0.499	0.342
																												0.23	0.227	0.172	0.175	0.233	0.267	0.176	0.228	0.344	0.205	0.226	0.284	0.233	0.23	0.301	0.236	0.226	0.293	0.262	0.23	0.379	0.314
																												0.24	0.238	0.258	0.161	0.242	0.146	0.162	0.239	0.198	0.187	0.235	0.319	0.215	0.241	0.241	0.217	0.236	0.31	0.242	0.24	0.336	0.291
																												0.25	0.247	0.129	0.15	0.252	0.138	0.151	0.248	0.189	0.174	0.245	0.232	0.198	0.251	0.267	0.2	0.248	0.181	0.221	0.251	0.327	0.268
																												0.26	0.259	0.155	0.136	0.263	0.164	0.138	0.258	0.215	0.161	0.255	0.25	0.183	0.261	0.258	0.185	0.257	0.293	0.205	0.261	0.276	0.249
																												0.27	0.268	0.155	0.127	0.272	0.121	0.13	0.268	0.164	0.15	0.265	0.25	0.17	0.272	0.241	0.171	0.267	0.232	0.191	0.27	0.276	0.231
																												0.28	0.277	0.06	0.119	0.282	0.181	0.12	0.278	0.138	0.139	0.275	0.224	0.158	0.281	0.198	0.161	0.276	0.155	0.178	0.279	0.301	0.218
																												0.29	0.287	0.121	0.111	0.292	0.06	0.113	0.289	0.138	0.129	0.285	0.198	0.148	0.292	0.112	0.148	0.288	0.224	0.164	0.29	0.258	0.202
																												0.3	0.298	0.095	0.103	0.3	0.095	0.106	0.298	0.121	0.121	0.295	0.095	0.138	0.301	0.189	0.14	0.297	0.241	0.154	0.3	0.181	0.189
																												0.31	0.309	0.086	0.095	0.311	0.043	0.099	0.307	0.06	0.114	0.305	0.164	0.129	0.311	0.112	0.131	0.306	0.138	0.146	0.311	0.241	0.176
																												0.32	0.319	0.052	0.09	0.322	0.069	0.093	0.317	0.112	0.108	0.316	0.146	0.121	0.32	0.121	0.124	0.318	0.146	0.136	0.321	0.189	0.167
																												0.33	0.328	0.069	0.085	0.33	0.06	0.088	0.328	0.095	0.1	0.325	0.103	0.114	0.33	0.095	0.117	0.328	0.155	0.128	0.329	0.138	0.158
																												0.34	0.338	0.077	0.08	0.342	0.121	0.082	0.341	0.043	0.093	0.335	0.077	0.107	0.342	0.189	0.109	0.338	0.181	0.12	0.339	0.215	0.15
																												0.35	0.347	0.043	0.076	0.351	0.069	0.078	0.349	0.043	0.089	0.345	0.077	0.101	0.351	0.121	0.103	0.347	0.112	0.114	0.35	0.181	0.141
																												0.36	0.357	0.06	0.072	0.362	0.095	0.074	0.362	0.026	0.082	0.356	0.129	0.095	0.36	0.112	0.098	0.357	0.138	0.108	0.359	0.207	0.133
																												0.37	0.369	0.077	0.067	0.371	0.017	0.07	0.37	0.086	0.079	0.365	0.026	0.09	0.371	0.112	0.093	0.367	0.121	0.102	0.37	0.164	0.126
																												0.38	0.377	0.06	0.064	0.383	0.069	0.066	0.377	0.06	0.076	0.375	0.043	0.086	0.38	0.077	0.088	0.377	0.103	0.097	0.38	0.095	0.12
																												0.39	0.387	0.077	0.061	0.393	0.06	0.062	0.389	0.043	0.072	0.384	0.043	0.082	0.391	0.095	0.084	0.387	0.129	0.092	0.391	0.077	0.113
																												0.4	0.397	0.026	0.058	0.402	0.034	0.06	0.399	0.095	0.068	0.396	0.077	0.077	0.403	0.069	0.079	0.398	0.052	0.087	0.4	0.121	0.108
																												0.41	0.407	0.034	0.055	0.413	0.009	0.056	0.41	0.06	0.065	0.406	0.103	0.073	0.41	0.095	0.076	0.407	0.112	0.083	0.409	0.095	0.103
																												0.42	0.417	0.009	0.053	0.424	0.052	0.054	0.417	0.034	0.062	0.417	0.103	0.07	0.421	0.06	0.072	0.418	0.06	0.079	0.419	0.121	0.099
																												0.43	0.427	0.034	0.05	0.43	0.034	0.052	0.429	0.052	0.059	0.423	0.069	0.067	0.43	0.052	0.069	0.427	0.043	0.076	0.43	0.077	0.094
																												0.44	0.436	0.009	0.048	0.445	0.034	0.049	0.438	0.043	0.057	0.436	0.034	0.064	0.443	0.06	0.065	0.438	0.095	0.072	0.441	0.069	0.089
																												0.45	0.449	0.017	0.045	0.452	0.026	0.047	0.447	0.034	0.054	0.445	0.043	0.061	0.45	0.06	0.063	0.447	0.043	0.069	0.449	0.069	0.086
																												0.46	0.455	0.017	0.044	0.464	0.026	0.045	0.461	0.043	0.051	0.455	0.069	0.058	0.461	0.034	0.06	0.457	0.052	0.066	0.461	0.069	0.082
																												0.47	0.465	0.026	0.042	0.472	0.06	0.043	0.469	0.043	0.049	0.467	0.034	0.056	0.47	0.052	0.058	0.465	0.077	0.064	0.47	0.06	0.079
																												0.48	0.479	0.017	0.04	0.48	0.034	0.042	0.478	0.017	0.048	0.475	0.034	0.054	0.478	0.06	0.056	0.475	0.069	0.061	0.481	0.069	0.075
																												0.49	0.488	0.009	0.039	0.495	0.009	0.039	0.484	0.009	0.046	0.485	0.086	0.051	0.493	0.034	0.053	0.486	0.069	0.059	0.49	0.069	0.073
																												0.5	0.5	0.034	0.037	0.501	0.034	0.038	0.5	0.043	0.044	0.496	0.034	0.049	0.501	0.043	0.051	0.496	0.052	0.056	0.501	0.095	0.069
																												0.51	0.507	0.017	0.036	0.512	0	0.037	0.509	0.017	0.042	0.505	0.034	0.048	0.509	0.026	0.05	0.507	0.06	0.054	0.51	0.069	0.067
																												0.52	0.517	0.017	0.034	0.521	0.043	0.036	0.519	0.017	0.04	0.515	0	0.046	0.524	0.034	0.047	0.516	0.043	0.052	0.518	0.069	0.065
																												0.53	0.528	0	0.033	0.53	0.017	0.034	0.527	0.017	0.039	0.53	0.009	0.043	0.53	0.034	0.046	0.524	0.026	0.05	0.53	0.052	0.062
																												0.54	0.535	0.009	0.032	0.542	0.017	0.033	0.535	0.009	0.038	0.534	0.017	0.043	0.54	0.026	0.044	0.535	0.043	0.048	0.539	0.034	0.06
																												0.55	0.549	0.009	0.031	0.55	0.034	0.032	0.546	0.009	0.036	0.547	0.017	0.041	0.548	0.009	0.043	0.547	0.06	0.046	0.55	0.077	0.058
																												0.56	0.557	0.017	0.03	0.566	0.009	0.03	0.557	0.034	0.035	0.555	0.009	0.039	0.56	0.026	0.041	0.555	0.052	0.045	0.562	0.026	0.055
																												0.57	0.566	0.009	0.029	0.572	0.017	0.03	0.573	0.009	0.033	0.566	0.017	0.038	0.57	0.034	0.04	0.569	0.009	0.043	0.571	0.086	0.054
																												0.58	0.578	0.017	0.027	0.582	0	0.029	0.579	0.052	0.032	0.575	0.026	0.037	0.582	0.017	0.038	0.577	0	0.042	0.58	0.034	0.052
																												0.59	0.586	0.009	0.027	0.593	0.009	0.027	0.586	0.009	0.032	0.584	0.017	0.036	0.592	0.034	0.037	0.587	0.009	0.04	0.588	0.026	0.051
																												0.6	0.598	0	0.026	0.603	0.017	0.027	0.601	0.017	0.03	0.593	0.009	0.035	0.601	0.026	0.036	0.598	0.026	0.039	0.601	0.017	0.048
																												0.61	0.608	0	0.025	0.615	0.017	0.026	0.61	0.017	0.029	0.609	0.009	0.033	0.61	0.043	0.035	0.611	0.009	0.037	0.608	0.052	0.047
																												0.62	0.617	0.009	0.024	0.622	0	0.025	0.616	0.017	0.029	0.611	0.026	0.032	0.62	0.026	0.033	0.619	0.017	0.036	0.619	0.06	0.046
																												0.63	0.627	0.017	0.023	0.636	0.009	0.024	0.629	0.026	0.028	0.624	0.026	0.031	0.627	0.009	0.033	0.627	0	0.035	0.628	0.009	0.044
																												0.64	0.638	0	0.023	0.642	0	0.023	0.636	0.009	0.027	0.635	0	0.03	0.637	0.009	0.032	0.636	0.034	0.034	0.641	0.017	0.043
																												0.65	0.648	0	0.022	0.652	0.017	0.023	0.651	0.009	0.026	0.644	0.034	0.029	0.647	0.009	0.031	0.647	0.017	0.033	0.65	0.017	0.041
																												0.66	0.658	0	0.021	0.661	0.009	0.022	0.658	0	0.025	0.653	0.026	0.029	0.659	0.017	0.03	0.656	0.009	0.032	0.66	0.06	0.04
																												0.67	0.671	0.017	0.02	0.674	0.009	0.021	0.668	0	0.024	0.665	0.009	0.027	0.671	0.009	0.029	0.667	0.009	0.031	0.673	0.017	0.039
																												0.68	0.678	0	0.02	0.682	0	0.021	0.679	0.009	0.024	0.677	0.017	0.026	0.682	0.017	0.028	0.677	0.026	0.03	0.679	0.026	0.038
																												0.69	0.687	0.009	0.019	0.69	0.009	0.02	0.689	0.017	0.023	0.688	0.009	0.026	0.695	0.017	0.027	0.684	0.017	0.03	0.686	0.009	0.037
																												0.7	0.697	0.009	0.019	0.702	0	0.02	0.699	0.026	0.022	0.695	0	0.025	0.7	0.009	0.026	0.697	0.026	0.029	0.697	0.026	0.036
																												0.71	0.706	0.009	0.018	0.708	0.009	0.019	0.704	0.009	0.022	0.704	0.017	0.025	0.706	0.009	0.026	0.707	0	0.028	0.711	0.043	0.035
																												0.72	0.72	0.017	0.018	0.722	0	0.019	0.719	0.026	0.021	0.71	0.009	0.024	0.721	0.017	0.025	0.715	0.034	0.027	0.722	0.009	0.034
																												0.73	0.733	0.009	0.017	0.734	0.009	0.018	0.728	0	0.021	0.725	0.034	0.023	0.727	0.017	0.024	0.728	0.026	0.026	0.734	0.017	0.033
																												0.74	0.738	0	0.017	0.742	0	0.018	0.738	0	0.02	0.74	0.009	0.022	0.745	0.017	0.023	0.736	0.017	0.026	0.738	0.017	0.032
																												0.75	0.747	0.009	0.017	0.752	0.009	0.017	0.749	0.009	0.019	0.747	0.026	0.022	0.751	0	0.023	0.749	0.017	0.025	0.749	0.06	0.031
																												0.76	0.762	0.009	0.016	0.762	0	0.017	0.758	0	0.019	0.758	0.009	0.021	0.761	0	0.022	0.759	0.017	0.024	0.764	0.009	0.03
																												0.77	0.768	0	0.016	0.772	0	0.016	0.768	0	0.018	0.764	0.017	0.021	0.772	0.034	0.022	0.768	0.017	0.024	0.771	0.026	0.03
																												0.78	0.778	0	0.015	0.782	0	0.016	0.778	0	0.018	0.779	0.017	0.02	0.781	0	0.021	0.778	0.009	0.023	0.782	0.026	0.029
																												0.79	0.788	0	0.015	0.792	0	0.015	0.788	0	0.018	0.785	0	0.02	0.791	0	0.021	0.785	0.017	0.023	0.79	0.017	0.028
																												0.8	0.803	0.009	0.014	0.805	0.017	0.015	0.798	0	0.017	0.799	0.017	0.019	0.801	0	0.02	0.801	0.009	0.022	0.801	0.052	0.027
																												0.81	0.808	0	0.014	0.812	0	0.015	0.808	0	0.017	0.805	0	0.019	0.811	0	0.02	0.807	0	0.021	0.813	0.009	0.027
																												0.82	0.818	0	0.014	0.821	0.009	0.014	0.817	0.009	0.016	0.815	0	0.018	0.821	0	0.019	0.817	0	0.021	0.819	0.026	0.026
																												0.83	0.828	0	0.013	0.83	0.009	0.014	0.828	0.009	0.016	0.825	0	0.018	0.831	0	0.019	0.823	0.009	0.021	0.829	0.026	0.026
																												0.84	0.841	0.009	0.013	0.842	0	0.014	0.838	0	0.016	0.835	0	0.017	0.842	0.009	0.018	0.839	0.034	0.02	0.84	0.034	0.025
																												0.85	0.848	0.009	0.013	0.853	0.009	0.013	0.848	0	0.015	0.846	0.026	0.017	0.851	0	0.018	0.848	0.009	0.019	0.85	0	0.024
																												0.86	0.854	0.009	0.013	0.858	0.009	0.013	0.863	0.009	0.015	0.854	0.017	0.017	0.86	0.026	0.017	0.861	0.009	0.019	0.86	0.017	0.024
																												0.87	0.868	0	0.012	0.872	0	0.013	0.868	0	0.014	0.865	0	0.016	0.871	0	0.017	0.866	0.009	0.019	0.872	0.026	0.023
																												0.88	0.878	0	0.012	0.882	0	0.012	0.878	0	0.014	0.875	0	0.016	0.881	0	0.017	0.88	0.017	0.018	0.88	0	0.023
																												0.89	0.888	0	0.012	0.892	0.009	0.012	0.888	0	0.014	0.884	0.009	0.016	0.888	0.009	0.016	0.887	0	0.018	0.89	0	0.022
																												0.9	0.898	0	0.011	0.902	0.009	0.012	0.898	0	0.014	0.895	0	0.015	0.901	0	0.016	0.894	0.009	0.017	0.897	0.009	0.022
																												0.91	0.911	0.009	0.011	0.912	0	0.012	0.911	0.017	0.013	0.905	0	0.015	0.91	0.009	0.016	0.911	0.009	0.017	0.908	0.009	0.021
																												0.92	0.922	0.009	0.011	0.922	0	0.011	0.914	0.009	0.013	0.915	0.009	0.015	0.921	0	0.015	0.917	0	0.017	0.92	0	0.021
																												0.93	0.928	0	0.011	0.932	0	0.011	0.928	0	0.013	0.925	0	0.014	0.931	0	0.015	0.93	0.017	0.016	0.93	0	0.02
																												0.94	0.938	0	0.01	0.942	0	0.011	0.938	0	0.012	0.935	0.009	0.014	0.941	0	0.015	0.937	0	0.016	0.94	0	0.02
																												0.95	0.946	0.009	0.01	0.952	0	0.011	0.948	0	0.012	0.95	0.009	0.013	0.95	0.017	0.014	0.947	0	0.016	0.948	0.034	0.02
																												0.96	0.958	0	0.01	0.962	0	0.01	0.958	0	0.012	0.955	0	0.013	0.961	0	0.014	0.962	0.009	0.015	0.957	0.009	0.019
																												0.97	0.968	0	0.01	0.972	0	0.01	0.968	0	0.012	0.965	0	0.013	0.971	0	0.014	0.967	0	0.015	0.97	0	0.019
																												0.98	0.978	0	0.01	0.986	0.009	0.01	0.978	0	0.011	0.975	0	0.013	0.981	0	0.013	0.975	0.009	0.015	0.98	0	0.018
																												0.99	0.988	0	0.009	0.992	0	0.01	0.988	0	0.011	0.985	0	0.013	0.996	0.009	0.013	0.987	0	0.014	0.986	0.009	0.018
																												1	0.998	0	0.009	1.002	0	0.01	0.998	0	0.011	0.995	0	0.012	1.001	0	0.013	0.997	0	0.014	1	0	0.018
																													-------	---		-------	---		-------	---		-------	---		-------	---		-------	---		-------	---
[truncated: 78 more columns]

## Sheet: FigS3
ARITMETIC AVERAGE - MEDIAN OF ABSOLUTE DEVIATIONS
Number of intakes:			2	Length of the sampling period:						100	s	Unit:	0.01	µmol mol-1
month\time	0	1	2	3	4	5	6	7	8	9	10	11	12	13	14	15	16	17	18	19	20	21	22	23		Legend
JAN	2	2	3	3	4	2	4	5	4	6	6	6	4	3	2	2	4	3	3	2	2	3	3	3
FEB	2	1	1	1	1	2	2	2	4	3	2	2	3	3	1	2	2	2	2	2	2	2	2	1			<50
MAR	2	3	2	3	2	3	2	4	4	3	3	2	2	2	2	2	1	1	2	2	2	2	2	2			50-100
APR	6	5	5	6	7	8	14	11	8	8	7	6	7	5	4	3	3	3	3	5	3	4	4	5			100-150
MAY	8	6	10	9	6	17	22	15	14	10	12	9	10	9	11	8	6	4	4	6	8	11	14	8			150-200
JUN	6	7	8	9	10	13	23	18	9	11	14	12	12	12	8	7	5	3	3	6	6	9	6	8			200-300
JUL	16	19	16	16	10	32	33	18	13	13	12	10	12	12	10	6	6	4	4	6	9	13	13	13			300-400
AUG	9	6	7	18	10	13	21	21	13	9	6	7	6	5	5	5	6	5	9	4	5	9	7	7			400-500
SEP	5	5	10	9	10	10	14	23	21	10	6	4	4	3	3	3	2	4	4	6	6	5	5	6			500-600
OCT	4	2	5	7	6	5	4	9	10	10	7	5	4	4	5	2	4	4	2	4	4	5	5	4			>600
NOV	5	7	7	5	5	6	5	6	9	10	9	6	3	3	3	4	5	6	4	4	4	3	5	5
DEC	2	2	2	3	3	3	3	4	3	6	6	8	5	2	3	3	4	3	2	3	3	3	3	3
Number of intakes:			2	Length of the sampling period:						120	s	Unit:	0.01	µmol mol-1
month\time	0	1	2	3	4	5	6	7	8	9	10	11	12	13	14	15	16	17	18	19	20	21	22	23
JAN	4	3	4	7	8	4	4	3	3	6	5	6	6	3	3	2	4	3	3	2	2	2	2	3
FEB	2	2	1	2	1	3	2	3	6	3	3	2	2	2	2	2	2	1	2	2	2	2	2	2
MAR	2	3	3	2	3	3	2	5	3	3	5	3	2	2	3	2	2	2	2	2	2	3	2	2
APR	7	5	6	5	6	8	11	15	10	8	7	6	5	4	4	2	3	3	3	6	3	4	5	5
MAY	13	6	7	6	8	15	30	21	16	13	11	9	11	9	11	9	6	4	4	7	10	11	15	15
JUN	7	7	10	9	12	14	24	13	12	11	12	13	11	12	10	9	5	4	3	6	6	6	7	8
JUL	22	9	15	15	14	31	28	21	14	10	13	14	9	11	9	7	4	4	5	6	7	10	12	13
AUG	10	7	11	13	12	23	22	28	17	9	8	9	6	6	4	4	6	5	8	4	4	9	9	6
SEP	6	4	6	10	9	14	14	19	22	15	6	4	5	4	4	3	3	3	6	5	4	5	10	9
OCT	5	4	9	7	6	6	4	11	11	11	5	6	5	4	6	3	4	3	4	4	4	5	6	5
NOV	7	5	7	5	7	7	6	9	10	11	7	6	3	4	4	4	5	6	4	5	3	4	6	5
DEC	3	2	2	4	7	5	3	4	4	7	7	6	10	2	3	3	5	3	2	3	4	2	2	2
Number of intakes:			2	Length of the sampling period:						150	s	Unit:	0.01	µmol mol-1
month\time	0	1	2	3	4	5	6	7	8	9	10	11	12	13	14	15	16	17	18	19	20	21	22	23
JAN	4	2	3	5	9	3	6	5	5	8	5	6	7	3	3	2	3	4	3	2	2	4	2	3
FEB	2	2	1	2	1	2	3	2	5	4	3	2	3	3	3	2	2	2	2	2	3	2	2	2
MAR	2	3	2	2	4	3	2	5	5	3	3	3	3	3	3	3	2	2	2	1	3	3	2	3
APR	5	8	8	8	6	8	13	15	13	9	9	8	4	5	5	3	3	4	4	5	3	3	6	6
MAY	11	6	10	9	11	15	32	22	16	14	10	11	12	10	12	8	6	4	4	8	16	9	20	18
JUN	11	8	7	11	13	13	28	18	13	10	9	13	12	11	9	8	6	4	5	6	8	10	7	10
JUL	21	17	16	18	10	27	34	23	16	13	15	11	11	12	10	7	5	5	8	7	8	13	13	20
AUG	8	7	7	14	18	17	29	36	21	11	9	7	6	5	5	6	5	5	9	3	8	10	9	6
SEP	8	7	12	10	16	14	13	18	22	13	12	5	5	5	4	4	3	4	5	6	3	6	5	9
OCT	5	3	10	9	7	8	5	13	12	10	8	6	5	5	4	3	5	4	4	4	4	8	5	5
NOV	8	5	8	7	5	5	7	7	13	17	11	6	4	4	4	6	7	7	6	4	5	5	6	5
DEC	3	3	3	3	5	4	4	4	6	5	6	8	7	6	5	4	5	3	2	3	3	3	2	2
Number of intakes:			2	Length of the sampling period:						180	s	Unit:	0.01	µmol mol-1
month\time	0	1	2	3	4	5	6	7	8	9	10	11	12	13	14	15	16	17	18	19	20	21	22	23
JAN	5	2	6	7	6	2	6	5	5	7	7	6	5	4	3	4	5	3	3	2	2	2	3	4
FEB	2	2	2	2	2	2	4	2	5	7	4	2	3	3	3	2	2	2	3	3	3	2	3	2
MAR	3	3	3	3	4	3	2	6	5	5	5	3	3	2	2	2	2	2	2	2	2	4	3	3
APR	9	4	6	6	6	9	12	20	15	9	10	7	6	4	6	4	4	3	4	6	4	5	5	9
MAY	21	6	13	5	7	14	33	21	18	17	15	13	10	13	11	8	5	6	6	7	18	22	12	23
JUN	7	8	8	11	13	18	33	23	12	12	14	15	12	16	13	8	6	6	6	8	6	7	7	10
JUL	22	12	12	14	14	37	41	29	21	11	14	11	11	14	12	9	5	6	6	10	11	12	18	28
AUG	8	7	12	23	12	18	36	33	25	13	10	10	7	6	6	5	4	6	7	5	9	13	10	5
SEP	9	4	7	12	17	12	14	27	32	12	11	7	6	5	4	3	3	5	7	7	6	5	10	8
OCT	4	3	8	8	6	6	5	12	14	13	9	7	6	5	5	4	6	6	4	5	6	10	7	5
NOV	10	5	12	8	4	7	6	9	13	12	11	6	5	5	5	5	9	8	6	5	5	5	7	6
DEC	4	3	3	3	5	5	6	6	5	7	8	12	9	5	5	3	4	4	3	4	4	2	3	4
Number of intakes:			2	Length of the sampling period:						200	s	Unit:	0.01	µmol mol-1
month\time	0	1	2	3	4	5	6	7	8	9	10	11	12	13	14	15	16	17	18	19	20	21	22	23
JAN	5	3	4	4	4	3	6	5	5	7	7	7	5	5	5	3	5	4	3	3	3	2	3	3
FEB	3	2	2	2	2	4	3	4	6	5	4	2	3	3	3	3	2	3	3	3	3	3	3	3
MAR	2	3	3	3	4	3	3	5	5	3	4	4	3	3	4	2	3	2	3	3	3	3	4	3
APR	12	7	5	8	12	9	14	17	15	8	10	7	7	5	5	4	4	3	6	7	4	5	7	5
MAY	16	12	11	8	7	20	31	25	22	19	16	13	13	13	14	10	6	7	5	6	14	8	16	18
JUN	13	11	13	10	10	20	36	22	15	12	14	12	12	16	11	8	7	6	5	9	6	8	12	8
JUL	15	15	15	22	14	42	43	27	18	12	14	14	12	13	11	10	7	8	7	11	11	16	11	12
AUG	8	9	6	18	12	21	33	37	24	12	9	9	7	6	5	5	8	6	11	7	8	15	14	8
SEP	7	7	8	15	17	12	16	22	32	18	13	8	7	4	5	4	3	6	6	5	7	6	10	13
OCT	6	5	9	8	7	5	6	11	16	15	8	7	7	5	7	4	5	4	5	6	5	9	7	5
NOV	8	7	10	7	9	5	9	9	11	17	11	6	4	5	4	5	7	9	7	6	4	6	6	5
DEC	3	3	3	3	3	7	6	5	7	8	8	11	10	4	4	4	4	7	4	4	4	2	3	3
Number of intakes:			2	Length of the sampling period:						225	s	Unit:	0.01	µmol mol-1
month\time	0	1	2	3	4	5	6	7	8	9	10	11	12	13	14	15	16	17	18	19	20	21	22	23
JAN	6	4	4	6	11	3	9	5	4	11	8	6	11	4	4	4	4	4	3	3	3	2	3	5
FEB	3	3	2	2	2	4	4	4	6	7	4	3	5	4	3	2	2	3	4	3	3	3	3	3
MAR	3	4	3	4	3	3	4	7	5	5	4	3	3	3	3	3	3	3	3	2	3	5	3	3
APR	7	5	6	7	7	14	19	22	16	9	8	6	6	6	5	3	5	4	6	6	5	5	7	8
MAY	20	7	13	8	11	17	33	34	22	22	14	14	12	12	13	9	8	6	7	12	17	9	17	11
JUN	10	10	10	11	17	17	38	27	16	12	16	15	16	15	14	9	8	6	5	10	8	8	6	10
JUL	20	11	15	17	12	46	48	33	25	17	16	15	11	13	14	8	6	8	7	11	13	15	17	12
AUG	9	9	6	19	13	20	49	50	27	18	9	11	8	6	5	7	7	9	16	8	8	14	9	8
SEP	12	11	15	19	13	19	17	22	31	21	10	7	7	6	4	4	3	5	9	6	8	10	10	7
OCT	5	6	5	12	7	7	9	14	19	12	11	7	6	5	5	6	7	5	6	5	6	10	11	4
NOV	8	7	10	8	11	8	10	9	12	13	11	8	6	5	5	6	7	9	6	6	4	7	8	10
DEC	5	4	2	5	7	4	6	7	5	10	9	11	10	4	6	5	8	4	5	4	7	3	4	3
Number of intakes:			2	Length of the sampling period:						300	s	Unit:	0.01	µmol mol-1
month\time	0	1	2	3	4	5	6	7	8	9	10	11	12	13	14	15	16	17	18	19	20	21	22	23
JAN	4	5	5	9	9	4	9	6	6	10	8	9	9	6	6	5	6	4	5	3	3	3	4	6
FEB	3	4	2	3	3	4	5	4	5	10	4	4	4	5	3	4	3	4	5	4	4	3	3	3
MAR	3	5	4	4	3	4	4	7	7	6	6	3	5	3	4	3	4	3	3	3	2	6	5	4
APR	15	7	14	7	14	15	21	23	20	12	14	10	8	6	9	4	5	6	6	9	5	8	7	10
MAY	12	8	16	11	11	29	45	36	28	17	20	13	16	16	15	14	7	8	9	13	18	11	30	35
JUN	8	8	14	19	18	16	43	44	19	18	17	20	16	19	17	13	9	8	7	13	12	14	13	13
JUL	20	9	12	15	10	26	54	42	26	21	17	13	15	16	12	9	9	8	12	14	20	21	19	19
AUG	8	11	11	31	28	24	44	45	33	20	13	10	7	8	7	7	8	10	16	7	9	15	13	8
SEP	11	4	20	16	13	28	28	36	43	21	13	9	7	8	6	5	4	7	10	7	6	12	17	12
OCT	5	9	16	12	11	8	8	19	20	26	13	9	10	5	6	6	9	7	7	6	10	10	9	7
NOV	8	11	17	8	10	12	10	10	14	12	20	10	8	8	7	7	10	14	9	8	5	7	8	11
DEC	5	4	3	5	5	6	6	11	8	12	11	16	9	6	5	6	12	7	7	8	4	3	4	5
Number of intakes:			2	Length of the sampling period:						360	s	Unit:	0.01	µmol mol-1
month\time	0	1	2	3	4	5	6	7	8	9	10	11	12	13	14	15	16	17	18	19	20	21	22	23
JAN	6	3	7	8	15	5	10	7	7	9	11	10	8	7	5	5	6	6	5	3	3	4	5	6
FEB	4	5	3	4	3	5	7	4	10	12	5	5	5	5	4	4	4	4	6	5	6	4	5	4
MAR	4	6	5	3	7	6	6	8	8	8	7	4	4	5	4	5	4	4	4	3	4	6	5	5
APR	11	10	8	13	15	16	26	27	21	15	16	9	9	8	9	6	5	7	8	11	7	6	14	13
MAY	21	8	20	12	11	19	56	54	38	22	21	11	15	12	15	15	9	11	7	12	16	25	44	38
JUN	14	13	20	19	20	32	48	35	20	17	15	17	16	19	15	11	12	10	9	13	12	15	14	18
JUL	30	19	20	26	24	62	56	50	36	19	20	18	14	16	17	10	8	9	8	19	16	19	19	23
AUG	8	11	17	31	13	32	47	58	37	19	15	15	10	8	7	7	8	16	17	7	10	11	15	13
SEP	13	11	25	20	26	24	27	43	39	32	15	11	11	7	7	8	4	11	12	10	11	11	15	17
OCT	8	7	18	20	13	9	8	18	33	23	14	11	10	10	8	7	13	7	7	10	11	11	10	8
NOV	13	13	20	9	10	12	14	14	16	19	25	7	8	8	7	9	14	16	10	6	6	8	11	12
DEC	4	5	4	7	7	6	7	10	7	11	11	18	14	6	9	7	12	7	5	9	7	4	6	4
Number of intakes:			2	Length of the sampling period:						450	s	Unit:	0.01	µmol mol-1
month\time	0	1	2	3	4	5	6	7	8	9	10	11	12	13	14	15	16	17	18	19	20	21	22	23
JAN	8	6	6	7	16	9	11	7	10	11	10	13	11	9	7	8	8	8	4	4	5	4	5	6
FEB	5	5	3	5	5	4	10	5	9	11	8	6	6	6	5	5	5	6	7	6	6	6	5	5
MAR	4	8	5	5	7	5	6	10	9	11	10	7	6	5	6	5	5	4	4	4	4	9	7	5
APR	11	8	8	12	26	16	28	36	26	17	14	13	8	7	8	5	6	8	11	13	8	11	16	12
MAY	25	14	15	13	20	29	84	61	42	34	24	18	16	17	17	18	11	14	13	14	23	32	32	30
JUN	15	15	19	26	27	37	71	47	25	26	19	20	23	23	18	16	11	11	11	16	19	21	12	13
JUL	40	9	23	39	21	59	72	66	44	24	17	19	16	21	21	13	12	14	10	29	26	30	26	36
AUG	13	17	17	36	35	55	68	76	43	22	15	15	9	9	9	10	12	18	21	8	9	19	21	17
SEP	18	8	32	23	28	26	30	49	50	36	23	12	13	11	10	7	5	12	12	14	11	13	23	19
OCT	9	11	17	21	14	10	18	18	33	23	14	11	13	12	9	7	11	9	10	12	11	14	13	9
NOV	14	15	17	12	9	18	14	16	27	20	23	16	9	10	8	13	20	22	12	10	6	14	15	10
DEC	9	8	5	9	9	10	13	8	9	11	14	18	15	7	8	10	12	7	8	9	11	6	8	5
Number of intakes:			2	Length of the sampling period:						600	s	Unit:	0.01	µmol mol-1
month\time	0	1	2	3	4	5	6	7	8	9	10	11	12	13	14	15	16	17	18	19	20	21	22	23
JAN	10	9	9	16	18	9	9	13	11	14	14	17	11	13	12	7	13	8	8	6	8	6	8	9
FEB	7	7	5	6	5	6	9	7	11	11	10	7	9	7	6	7	5	7	9	8	8	7	6	7
MAR	8	8	10	7	7	8	7	13	10	14	8	9	8	6	7	8	7	6	5	7	7	11	11	7
APR	19	8	12	16	21	23	35	58	43	22	20	16	12	10	12	7	8	9	13	17	15	9	18	11
MAY	43	15	25	13	18	36	81	72	57	38	34	18	21	22	27	23	14	16	18	23	30	28	41	48
JUN	26	18	39	29	40	52	59	65	37	29	20	18	22	30	16	15	19	14	15	26	21	27	18	20
JUL	55	24	40	21	40	58	90	80	39	33	25	26	21	24	25	17	17	18	14	31	34	39	31	31
AUG	17	12	23	47	41	64	93	91	74	27	20	21	14	10	10	12	14	19	27	9	16	24	29	17
SEP	19	20	37	51	34	43	47	81	60	53	25	14	15	13	11	8	9	14	20	19	10	18	29	30
OCT	10	10	22	19	17	15	17	34	42	40	25	17	17	13	11	12	17	16	15	13	15	22	14	11
NOV	20	17	25	16	20	16	21	20	34	27	28	16	11	11	9	18	22	19	16	8	11	16	17	23
DEC	8	7	9	9	13	12	12	12	13	17	18	21	20	8	15	12	12	9	10	11	15	7	10	5
Number of intakes:			2	Length of the sampling period:						900	s	Unit:	0.01	µmol mol-1
month\time	0	1	2	3	4	5	6	7	8	9	10	11	12	13	14	15	16	17	18	19	20	21	22	23
JAN	14	9	12	19	15	13	26	15	17	24	21	26	14	18	14	15	19	14	12	8	10	7	10	12
FEB	10	10	6	9	8	12	16	14	12	21	13	10	14	14	8	9	10	11	14	10	13	10	11	10
MAR	11	14	12	10	13	11	11	16	18	19	13	11	12	13	10	11	10	10	9	7	9	17	14	16
APR	28	26	18	26	44	42	60	68	64	31	32	24	17	15	20	10	14	14	21	28	14	17	31	30
MAY	50	15	43	22	28	85	162	104	77	50	40	31	28	26	35	26	20	25	21	38	35	16	87	55
JUN	44	27	50	50	58	55	90	101	52	31	31	24	32	30	24	22	17	22	21	36	35	37	23	34
JUL	40	36	73	45	54	103	127	107	75	45	36	24	27	33	34	22	22	28	19	37	56	53	56	51
AUG	25	38	31	49	52	81	123	137	100	44	32	27	18	17	12	19	16	33	34	24	27	28	38	20
SEP	24	22	59	84	38	63	79	109	92	75	42	20	20	16	14	15	15	20	27	26	20	25	40	31
OCT	14	18	36	35	19	28	29	36	63	60	33	24	23	19	14	19	26	21	23	25	24	34	22	20
NOV	27	20	44	18	23	23	27	30	51	45	46	28	16	18	15	17	33	35	23	18	15	22	21	28
DEC	19	9	12	16	15	23	15	21	16	38	20	39	24	11	16	17	23	17	14	17	22	9	15	8
Number of intakes:			2	Length of the sampling period:						1800	s	Unit:	0.01	µmol mol-1
month\time	0	1	2	3	4	5	6	7	8	9	10	11	12	13	14	15	16	17	18	19	20	21	22	23
JAN	24	21	29	46	57	24	40	29	37	47	43	35	41	34	24	24	32	31	25	17	19	18	19	31
FEB	23	21	13	20	18	22	30	19	40	48	33	22	26	25	18	21	21	26	30	23	26	20	24	19
MAR	19	30	30	22	23	25	26	44	34	36	25	19	20	21	20	22	22	18	16	16	17	40	26	27
APR	77	66	64	51	64	79	142	151	137	55	61	49	26	28	31	20	22	32	40	56	28	32	58	57
MAY	121	48	65	66	48	112	339	238	136	112	81	42	44	31	46	37	41	43	56	75	92	53	112	143
JUN	79	48	80	99	110	156	227	202	106	64	59	35	65	69	40	35	46	36	45	80	65	69	57	56
JUL	111	100	119	105	98	169	245	219	151	74	56	53	46	36	44	38	34	42	45	72	66	114	86	103
AUG	48	57	69	223	74	112	331	307	193	85	54	51	38	32	23	27	31	61	94	34	55	64	68	61
SEP	54	87	75	109	117	115	125	182	202	125	82	48	38	35	29	23	31	43	49	48	36	60	64	82
OCT	27	35	51	84	50	43	59	98	120	93	65	52	42	35	30	32	50	51	43	43	54	48	51	22
NOV	47	48	84	36	48	50	57	52	86	103	80	49	38	37	37	53	54	68	47	37	29	49	44	43
DEC	21	23	19	28	42	29	29	37	43	47	42	73	64	27	29	38	48	28	33	34	36	18	24	17
Number of intakes:			3	Length of the sampling period:						100	s	Unit:	0.01	µmol mol-1
month\time	0	1	2	3	4	5	6	7	8	9	10	11	12	13	14	15	16	17	18	19	20	21	22	23
JAN	4	3	4	5	9	3	7	5	5	8	8	7	7	4	3	3	4	4	3	3	3	4	3	5
FEB	2	2	2	2	2	3	4	3	5	6	3	3	4	3	3	2	2	2	3	2	3	3	2	3
MAR	3	4	3	4	4	3	3	6	5	4	4	3	3	3	4	3	3	2	3	2	3	3	3	4
APR	8	8	8	9	12	8	14	17	13	10	11	10	7	6	6	4	4	4	5	6	4	5	8	8
MAY	15	6	10	9	15	14	41	24	19	16	15	14	15	12	17	11	8	6	6	9	16	19	24	20
JUN	14	10	11	12	12	17	41	19	15	14	16	18	15	14	11	11	8	5	6	8	9	12	9	11
JUL	26	15	20	21	13	39	38	27	19	15	18	15	17	15	15	10	7	5	9	10	12	18	17	23
AUG	9	11	9	16	14	22	40	36	25	13	10	11	8	7	7	7	6	8	10	4	9	14	12	9
SEP	11	7	16	13	20	19	14	26	25	15	12	6	6	6	5	5	3	5	6	6	6	8	9	11
OCT	6	5	11	9	8	8	8	14	16	12	9	7	7	6	5	4	5	6	5	5	6	9	8	5
NOV	9	8	9	9	8	7	7	8	15	17	12	8	4	5	5	5	7	9	8	6	6	5	7	6
DEC	4	4	3	3	5	5	4	5	6	5	7	11	9	6	5	5	4	5	4	3	5	4	3	4
Number of intakes:			3	Length of the sampling period:						120	s	Unit:	0.01	µmol mol-1
month\time	0	1	2	3	4	5	6	7	8	9	10	11	12	13	14	15	16	17	18	19	20	21	22	23
JAN	5	4	6	8	10	3	8	7	5	9	9	8	7	5	4	5	5	4	3	3	3	4	4	5
FEB	3	2	2	2	2	2	4	3	6	8	4	3	4	4	3	3	2	2	3	3	4	3	3	3
MAR	3	3	3	3	4	5	3	7	6	5	5	4	4	3	3	3	3	3	3	3	3	4	4	4
APR	11	7	8	9	12	12	16	22	19	12	12	10	7	6	7	4	4	4	5	7	4	5	7	9
MAY	22	9	17	10	11	25	40	25	23	20	18	18	14	14	16	11	8	7	6	7	13	20	15	24
JUN	11	12	12	14	16	20	38	24	16	13	17	16	16	18	16	10	8	6	6	9	8	10	9	12
JUL	21	19	20	21	21	42	55	34	25	13	19	17	14	16	16	11	7	8	7	11	12	19	23	29
AUG	7	11	12	25	11	24	45	44	25	15	13	12	8	8	7	8	7	9	9	8	9	21	11	8
SEP	12	7	13	18	21	15	17	31	31	16	12	8	7	5	5	4	3	6	6	6	8	9	13	9
OCT	7	5	9	10	8	7	9	18	16	13	9	8	7	6	6	5	6	7	5	7	8	11	8	6
NOV	11	8	11	9	8	9	7	10	15	20	10	7	6	5	6	6	11	8	6	6	6	6	7	7
DEC	4	4	4	4	5	6	7	6	6	8	11	10	11	5	6	4	5	4	3	5	5	3	4	4
Number of intakes:			3	Length of the sampling period:						150	s	Unit:	0.01	µmol mol-1
month\time	0	1	2	3	4	5	6	7	8	9	10	11	12	13	14	15	16	17	18	19	20	21	22	23
JAN	6	4	5	7	10	4	9	6	6	11	10	7	11	5	4	5	6	4	4	3	4	3	4	5
FEB	3	3	2	3	3	5	4	4	7	7	4	3	4	4	3	3	3	3	4	3	3	3	3	3
MAR	3	5	4	4	4	5	5	7	7	7	6	5	4	4	4	3	3	3	3	3	3	4	4	4
APR	9	8	8	9	12	14	19	27	18	12	11	9	9	6	6	4	5	5	6	7	6	6	8	11
MAY	22	8	14	12	11	21	41	36	27	22	18	17	15	17	18	12	10	7	8	15	23	11	27	21
JUN	13	14	14	14	20	22	38	30	19	15	18	20	17	17	18	13	10	7	6	10	9	11	11	13
JUL	29	16	21	23	19	52	57	37	26	19	18	20	18	15	18	11	8	7	8	13	14	16	18	20
AUG	10	13	12	26	17	22	47	48	31	21	11	12	8	9	7	9	8	10	17	8	8	18	12	10
SEP	11	10	17	18	16	22	20	26	34	23	13	10	7	6	6	5	4	6	9	8	9	10	12	8
OCT	6	6	11	13	9	9	11	15	22	17	11	9	8	7	7	6	7	6	6	6	6	10	12	8
NOV	8	8	10	10	10	11	11	11	14	18	18	9	7	7	6	7	9	11	8	6	5	7	10	9
DEC	5	4	3	5	8	7	7	6	7	11	10	14	12	6	5	6	8	7	6	6	7	4	4	3
Number of intakes:			3	Length of the sampling period:						200	s	Unit:	0.01	µmol mol-1
month\time	0	1	2	3	4	5	6	7	8	9	10	11	12	13	14	15	16	17	18	19	20	21	22	23
JAN	5	5	6	10	10	4	9	8	7	12	10	10	10	7	6	6	8	5	5	4	4	4	4	7
FEB	4	4	3	3	3	5	5	5	8	11	5	4	6	5	4	4	3	4	6	4	5	4	3	4
MAR	3	5	4	6	5	5	4	8	8	7	7	4	5	5	5	4	4	3	4	3	4	6	5	4
APR	13	10	15	11	17	14	25	27	23	15	15	12	9	8	9	6	6	6	8	9	6	9	8	12
MAY	16	11	18	12	14	28	54	41	31	20	21	16	19	17	19	16	8	9	8	16	24	14	45	26
JUN	13	11	15	20	19	21	60	42	22	21	21	21	21	21	18	14	13	9	9	12	12	14	15	15
JUL	21	14	21	23	15	47	60	45	31	24	18	17	16	19	17	12	10	9	14	16	20	24	32	28
AUG	11	10	12	24	25	22	52	60	39	19	15	12	9	9	10	9	11	11	15	8	11	17	12	11
SEP	14	8	22	17	16	25	28	36	44	30	17	11	8	8	7	7	5	9	11	9	9	9	15	13
OCT	8	9	18	16	12	10	9	21	24	25	16	11	11	8	8	7	9	8	8	7	10	12	13	8
NOV	11	11	18	9	11	13	13	12	15	19	21	11	8	8	8	8	14	14	10	9	7	8	10	12
DEC	6	5	4	5	8	7	9	10	9	12	12	17	13	9	7	6	12	8	6	8	5	4	5	5
Number of intakes:			3	Length of the sampling period:						240	s	Unit:	0.01	µmol mol-1
month\time	0	1	2	3	4	5	6	7	8	9	10	11	12	13	14	15	16	17	18	19	20	21	22	23
JAN	7	4	10	9	12	5	10	9	8	13	13	12	9	7	6	6	8	6	5	4	4	4	5	7
FEB	4	5	3	4	4	5	7	5	10	14	6	6	6	6	5	5	4	4	6	5	6	4	5	4
MAR	5	6	6	5	7	6	6	10	10	9	8	6	5	6	6	5	5	4	4	4	4	7	6	5
APR	13	11	11	14	16	16	26	31	25	18	18	11	10	10	10	5	6	7	8	11	7	8	12	13
MAY	31	11	24	12	13	24	57	51	38	26	30	17	16	17	23	16	10	12	10	15	23	26	40	33
JUN	16	13	18	23	20	29	49	37	21	20	19	22	22	25	20	16	14	10	10	15	13	15	16	20
JUL	33	23	26	36	37	75	86	51	39	22	22	24	20	20	23	13	11	10	13	22	21	21	30	33
AUG	11	13	18	38	25	34	62	67	40	23	18	16	12	10	8	10	10	18	18	8	19	14	20	14
SEP	15	15	24	20	23	38	27	45	47	32	21	12	12	9	8	8	5	10	12	12	12	12	20	14
OCT	9	7	19	18	14	10	11	19	33	24	16	12	11	10	9	7	13	9	8	10	12	12	10	9
NOV	16	12	20	12	11	14	15	16	18	21	22	10	9	10	9	9	15	17	11	8	8	10	12	14
DEC	6	6	5	7	8	7	11	11	9	11	12	24	17	9	10	8	11	10	6	9	8	5	7	6
Number of intakes:			3	Length of the sampling period:						300	s	Unit:	0.01	µmol mol-1
month\time	0	1	2	3	4	5	6	7	8	9	10	11	12	13	14	15	16	17	18	19	20	21	22	23
JAN	9	6	7	10	17	8	13	9	9	16	13	14	15	9	8	8	10	8	6	5	6	5	6	7
FEB	5	5	3	5	5	6	9	6	11	13	8	6	6	7	5	5	5	7	7	6	6	5	5	5
MAR	5	8	6	5	7	6	8	11	10	12	10	8	6	6	7	6	5	5	4	5	4	9	7	6
APR	19	11	10	12	28	19	34	39	30	19	17	14	11	9	9	6	7	8	11	12	10	11	16	15
MAY	27	14	21	15	20	33	80	66	44	37	30	23	22	21	22	21	11	15	15	14	30	27	38	33
JUN	18	19	26	26	29	40	68	48	29	29	21	27	24	28	23	21	13	13	11	21	17	21	14	16
JUL	39	15	33	41	33	76	89	68	51	30	28	28	19	27	25	16	14	15	11	29	28	28	28	40
AUG	16	19	25	45	35	56	79	88	49	26	19	20	10	12	11	12	14	19	24	10	14	20	22	19
SEP	19	15	30	29	30	34	31	60	56	37	25	15	13	11	11	8	7	11	14	15	16	15	23	21
OCT	9	11	16	17	16	11	17	24	32	23	18	13	13	13	11	9	12	10	11	11	11	17	17	9
NOV	13	15	21	15	14	19	17	18	28	24	26	17	11	11	10	12	19	21	13	12	8	15	15	12
DEC	10	7	6	9	12	11	13	11	11	15	16	23	16	8	11	10	15	8	8	9	13	6	9	6
Number of intakes:			3	Length of the sampling period:						400	s	Unit:	0.01	µmol mol-1
month\time	0	1	2	3	4	5	6	7	8	9	10	11	12	13	14	15	16	17	18	19	20	21	22	23
JAN	10	9	9	19	26	10	12	12	13	15	18	18	11	13	11	9	12	8	9	6	8	7	8	11
FEB	6	7	5	6	6	6	11	8	15	15	10	8	9	8	7	7	6	7	10	7	9	7	6	7
MAR	7	9	10	8	7	9	8	14	13	15	10	9	10	7	8	8	7	6	7	7	7	11	11	8
APR	22	21	23	18	30	24	40	58	42	23	23	18	16	13	15	8	9	10	14	18	15	14	21	15
MAY	42	15	29	15	22	40	81	72	59	40	36	23	25	27	32	24	17	17	19	25	28	37	47	47
JUN	25	19	36	30	41	54	78	71	38	32	26	26	28	35	25	21	21	16	15	26	23	28	20	25
JUL	56	29	48	33	40	76	109	84	43	37	29	26	27	26	29	19	19	18	16	35	36	45	37	38
AUG	19	14	23	58	48	65	97	89	74	31	23	21	16	13	12	15	17	20	29	11	18	27	30	20
SEP	20	17	40	49	40	49	50	74	73	55	26	17	14	15	13	10	9	14	20	20	15	19	29	28
OCT	13	10	28	24	20	18	19	34	42	44	27	18	19	14	13	13	19	16	17	13	16	20	17	12
NOV	23	19	26	18	22	20	21	22	33	29	32	17	13	13	11	18	23	23	17	13	11	16	18	22
DEC	10	9	8	9	16	12	13	15	13	17	18	22	25	9	13	15	17	11	11	12	14	7	10	6
Number of intakes:			3	Length of the sampling period:						600	s	Unit:	0.01	µmol mol-1
month\time	0	1	2	3	4	5	6	7	8	9	10	11	12	13	14	15	16	17	18	19	20	21	22	23
JAN	15	9	13	22	20	14	29	21	18	28	29	30	19	18	15	15	17	15	12	10	10	9	11	13
FEB	10	9	7	9	8	12	17	13	15	19	15	10	13	15	10	10	11	12	14	11	13	10	11	10
MAR	11	15	12	10	14	11	13	17	18	21	16	12	12	13	12	12	10	10	9	7	10	17	14	16
APR	28	26	24	31	40	45	58	71	61	32	31	26	19	16	19	12	13	15	22	28	18	17	33	33
MAY	63	20	38	24	30	70	168	106	78	59	44	33	35	28	38	32	25	27	23	37	48	44	77	54
JUN	41	35	50	52	63	65	108	100	54	38	33	29	39	39	30	28	21	24	22	35	35	38	35	37
JUL	55	48	85	47	59	115	138	115	82	50	41	36	30	37	35	26	25	31	23	43	62	54	64	78
AUG	26	40	40	74	55	84	130	145	96	45	33	29	18	19	16	22	22	37	35	23	26	32	45	31
SEP	38	34	63	80	57	66	72	121	105	80	46	23	23	19	18	15	14	21	28	30	23	25	43	35
OCT	16	19	38	40	21	26	29	47	65	63	35	27	26	21	17	19	25	22	22	25	25	36	26	21
NOV	31	23	44	25	27	31	34	33	54	49	46	28	18	20	17	19	35	36	24	19	15	24	24	28
DEC	20	12	13	18	17	24	20	20	17	36	25	42	30	16	20	18	23	17	15	17	24	12	15	10
Number of intakes:			3	Length of the sampling period:						1200	s	Unit:	0.01	µmol mol-1
month\time	0	1	2	3	4	5	6	7	8	9	10	11	12	13	14	15	16	17	18	19	20	21	22	23
JAN	30	21	30	55	54	29	47	35	37	53	49	45	46	33	28	29	34	33	27	19	19	21	21	31
FEB	22	20	16	22	19	25	32	25	40	49	33	23	28	28	21	22	23	27	30	25	27	22	26	21
MAR	20	31	30	24	28	26	28	48	37	39	28	20	22	23	22	24	22	20	20	16	20	39	27	26
APR	74	66	62	51	99	82	159	150	132	57	63	51	30	31	36	23	25	32	43	57	33	35	62	76
MAY	122	49	65	73	54	118	373	229	146	114	80	52	51	37	55	51	43	51	54	89	89	61	139	128
JUN	89	59	80	102	120	153	230	194	103	69	64	43	66	70	51	41	50	41	44	78	69	77	64	69
JUL	122	124	153	112	100	214	258	242	160	83	60	62	52	50	58	43	41	47	50	84	94	123	109	151
AUG	60	63	69	192	127	119	326	313	185	89	62	58	41	38	26	33	35	80	86	38	62	78	79	59
SEP	60	86	94	121	122	152	135	205	205	132	87	53	44	38	32	24	33	43	54	47	42	62	75	80
OCT	31	36	58	89	52	49	65	97	127	100	69	51	43	38	32	33	51	50	47	44	53	53	59	28
NOV	67	51	85	40	63	60	56	60	94	112	88	54	38	41	38	49	62	75	49	40	35	51	47	47
DEC	35	25	23	36	41	29	33	40	39	54	49	80	73	28	34	39	53	36	33	33	39	21	29	19
Number of intakes:			4	Length of the sampling period:						100	s	Unit:	0.01	µmol mol-1
month\time	0	1	2	3	4	5	6	7	8	9	10	11	12	13	14	15	16	17	18	19	20	21	22	23
JAN	6	4	6	8	9	4	8	7	7	11	13	10	7	6	5	4	6	5	5	4	4	4	4	5
FEB	3	3	2	3	2	4	4	5	7	6	4	4	4	4	3	3	3	3	4	4	4	3	3	3
MAR	3	4	4	4	4	5	5	6	6	6	6	5	4	4	4	3	3	3	3	4	4	4	4	4
APR	14	10	10	9	13	12	18	22	19	12	13	11	10	7	8	6	5	4	6	9	6	7	9	9
MAY	22	13	16	16	11	29	42	27	25	22	22	18	19	20	20	13	9	9	7	10	17	18	22	16
JUN	15	14	15	12	17	25	40	29	18	17	22	18	18	22	15	13	10	7	6	10	10	13	15	13
JUL	28	22	29	32	19	55	61	33	23	19	21	21	24	21	17	12	9	9	8	12	15	20	26	27
AUG	13	10	15	23	21	23	42	44	32	16	12	14	10	10	8	8	11	9	15	8	11	17	15	11
SEP	9	12	16	19	18	20	22	37	38	22	14	9	9	6	6	5	4	7	8	9	11	9	11	17
OCT	6	7	12	11	10	8	10	17	21	18	11	10	10	7	8	5	6	6	6	8	7	9	9	7
NOV	9	11	14	9	11	11	11	13	18	22	18	10	6	6	6	7	10	10	8	8	6	8	9	8
DEC	4	4	4	5	7	7	6	8	7	10	10	14	13	5	7	5	7	7	5	6	6	5	4	5
Number of intakes:			4	Length of the sampling period:						150	s	Unit:	0.01	µmol mol-1
month\time	0	1	2	3	4	5	6	7	8	9	10	11	12	13	14	15	16	17	18	19	20	21	22	23
JAN	6	6	6	10	13	5	11	8	8	14	11	10	10	6	7	6	8	6	6	4	4	5	4	7
FEB	4	4	3	4	3	6	6	6	8	10	6	4	5	5	5	4	4	4	6	4	5	4	4	4
MAR	5	6	5	7	5	5	5	9	9	8	7	5	5	5	5	4	4	4	4	3	4	6	5	4
APR	18	11	15	11	20	17	27	27	23	16	15	14	10	10	10	7	6	6	8	10	7	9	9	13
MAY	19	10	22	18	17	31	54	42	33	23	25	21	21	20	20	18	10	9	10	15	26	19	42	34
JUN	16	12	20	21	23	21	61	48	25	23	25	24	23	22	21	17	13	9	8	14	14	18	16	17
JUL	29	20	23	27	16	49	61	49	33	27	24	19	21	23	19	13	11	9	13	17	24	23	32	33
AUG	14	16	14	39	28	36	52	61	41	23	16	14	10	11	10	10	11	12	20	7	12	18	17	11
SEP	13	10	22	20	20	34	31	44	47	31	18	12	9	10	8	7	5	8	11	11	10	14	17	15
OCT	9	9	17	17	13	12	10	24	25	25	16	12	12	8	9	6	10	8	9	7	10	12	13	9
NOV	14	13	20	10	12	12	13	14	19	23	22	11	9	9	9	9	14	14	13	8	7	9	10	11
DEC	6	5	4	6	9	8	8	11	10	13	13	21	17	9	8	7	13	8	6	8	6	4	4	6
Number of intakes:			4	Length of the sampling period:						180	s	Unit:	0.01	µmol mol-1
month\time	0	1	2	3	4	5	6	7	8	9	10	11	12	13	14	15	16	17	18	19	20	21	22	23
JAN	8	4	9	12	17	6	11	9	9	12	12	12	9	8	7	6	8	7	5	4	4	5	6	7
FEB	4	5	3	4	4	6	8	5	11	12	6	6	6	6	5	5	4	4	6	5	6	5	5	5
MAR	5	7	6	5	8	7	6	10	10	10	9	6	5	6	6	5	5	4	5	4	5	7	6	5
APR	15	12	12	16	19	16	28	34	24	19	19	12	12	10	11	7	7	8	9	13	8	10	15	15
MAY	29	11	24	14	14	26	65	56	42	29	29	21	21	21	23	19	12	13	10	15	28	28	45	39
JUN	17	15	23	22	24	36	54	41	25	24	24	26	24	27	20	17	15	10	10	15	14	16	17	20
JUL	36	26	31	33	37	74	83	55	39	24	26	27	24	23	23	15	11	11	11	22	21	25	29	40
AUG	14	17	22	38	27	36	60	67	43	25	20	18	14	11	10	11	9	17	18	8	15	19	22	17
SEP	15	12	26	21	29	39	29	49	48	36	22	13	13	10	9	9	5	11	13	12	14	13	21	19
OCT	8	9	22	20	14	11	10	20	35	28	16	14	11	11	10	9	13	10	9	10	13	14	12	10
NOV	17	15	23	13	14	13	17	17	22	22	25	12	9	10	10	10	15	17	12	9	9	10	14	13
DEC	7	5	5	8	10	9	10	12	9	13	14	23	19	8	11	7	14	9	6	9	9	5	8	6
Number of intakes:			4	Length of the sampling period:						225	s	Unit:	0.01	µmol mol-1
month\time	0	1	2	3	4	5	6	7	8	9	10	11	12	13	14	15	16	17	18	19	20	21	22	23
JAN	9	7	8	10	19	9	15	10	11	19	14	16	16	10	9	9	9	8	6	5	5	5	7	8
FEB	5	5	4	5	5	6	10	6	12	12	8	7	8	7	5	5	5	7	7	6	7	6	6	6
MAR	5	9	6	6	7	6	8	12	10	12	11	8	7	6	7	7	6	5	5	5	5	10	7	7
APR	19	11	11	14	30	21	34	41	32	20	17	16	13	11	9	7	8	9	12	13	10	12	18	17
MAY	33	16	22	17	21	30	92	66	45	38	33	26	26	24	27	22	14	16	15	19	38	40	36	33
JUN	22	19	25	30	31	41	77	52	32	30	25	29	29	30	26	22	14	14	12	20	19	24	15	17
JUL	45	18	36	44	31	76	92	72	51	34	29	29	22	28	29	16	15	15	12	31	30	33	31	38
AUG	17	17	21	43	38	56	80	92	54	28	20	21	12	13	12	12	14	19	24	12	15	21	24	20
SEP	22	14	34	33	35	33	33	68	63	41	27	14	15	13	11	9	7	12	15	16	17	15	22	21
OCT	11	12	19	23	17	14	19	25	35	25	19	14	15	14	11	10	12	10	12	12	13	19	17	9
NOV	17	17	22	15	17	20	18	19	31	26	25	18	12	12	10	13	20	22	14	13	8	15	16	15
DEC	10	8	6	10	11	12	14	11	11	14	17	25	18	10	12	11	15	9	8	9	13	7	8	6
Number of intakes:			4	Length of the sampling period:						300	s	Unit:	0.01	µmol mol-1
month\time	0	1	2	3	4	5	6	7	8	9	10	11	12	13	14	15	16	17	18	19	20	21	22	23
JAN	10	10	9	20	25	10	15	15	14	18	20	19	15	14	13	9	13	9	9	7	9	7	9	10
FEB	7	8	5	6	6	8	12	8	14	16	10	8	10	9	7	7	6	7	9	8	10	7	7	7
MAR	8	9	11	8	8	9	9	14	13	15	10	10	9	8	8	8	8	6	7	7	8	11	11	8
APR	25	23	25	17	29	28	41	59	44	25	25	20	17	13	15	10	9	10	14	19	17	16	21	16
MAY	47	18	33	16	25	43	87	74	61	43	40	25	29	29	32	27	18	18	20	24	33	34	42	47
JUN	27	21	39	34	43	59	73	72	42	35	31	33	33	39	26	25	23	16	16	27	22	30	21	24
JUL	59	34	57	32	47	77	114	88	46	40	35	31	29	30	33	21	20	21	18	37	38	44	47	39
AUG	20	18	25	56	59	69	98	95	80	33	25	24	18	16	14	15	16	22	31	11	19	26	34	23
SEP	24	22	40	51	47	50	50	85	77	57	29	18	18	16	15	10	10	16	21	19	15	21	34	31
OCT	14	14	31	25	19	20	19	38	43	43	27	20	20	15	14	13	18	17	17	14	17	24	17	13
NOV	25	20	31	19	23	21	23	23	35	34	35	20	13	13	11	20	24	25	18	15	12	17	20	25
DEC	10	9	9	10	17	14	14	18	15	23	23	30	31	10	15	14	17	13	11	12	16	7	10	7
Number of intakes:			4	Length of the sampling period:						450	s	Unit:	0.01	µmol mol-1
month\time	0	1	2	3	4	5	6	7	8	9	10	11	12	13	14	15	16	17	18	19	20	21	22	23
JAN	16	12	14	23	24	16	29	20	20	32	31	30	19	20	15	17	20	15	13	11	11	9	13	13
FEB	11	10	7	10	9	13	18	15	20	22	15	12	15	15	10	10	11	12	15	11	15	11	11	11
MAR	12	15	13	11	15	13	14	18	20	21	17	13	13	13	12	12	11	10	11	8	10	18	15	16
APR	34	29	27	35	46	46	65	71	67	34	35	28	20	18	23	13	15	15	23	29	20	22	33	37
MAY	56	23	47	28	37	86	172	108	84	62	52	35	39	34	42	35	29	26	26	39	44	43	93	73
JUN	45	35	53	55	65	62	115	107	56	43	41	33	45	43	34	30	24	25	23	38	36	41	38	38
JUL	60	45	95	57	61	122	144	117	82	52	44	34	36	39	42	28	27	30	26	45	63	63	69	79
AUG	26	39	34	78	66	87	142	150	104	49	36	33	21	21	17	24	22	35	38	25	29	38	43	29
SEP	44	35	64	88	64	73	81	120	112	80	46	25	23	20	18	17	15	21	29	30	25	28	51	34
OCT	17	20	42	42	25	30	33	51	67	68	39	27	27	22	18	20	28	22	25	26	27	38	25	24
NOV	33	27	48	28	30	34	34	35	54	49	51	31	20	22	17	23	37	40	25	24	16	25	26	31
DEC	20	13	13	19	18	24	20	22	18	39	26	43	29	16	18	20	25	18	16	19	23	13	15	10
Number of intakes:			4	Length of the sampling period:						900	s	Unit:	0.01	µmol mol-1
month\time	0	1	2	3	4	5	6	7	8	9	10	11	12	13	14	15	16	17	18	19	20	21	22	23
JAN	30	23	32	56	62	29	46	36	40	59	49	50	44	38	31	31	38	33	27	20	20	20	22	32
FEB	23	22	16	22	19	26	32	29	43	55	35	24	29	28	23	24	23	27	32	26	28	24	26	21
MAR	22	32	31	23	28	28	29	53	38	40	29	22	24	24	22	26	23	21	20	19	22	43	29	29
APR	82	68	66	56	111	92	164	158	138	61	67	54	34	32	36	24	27	33	42	59	36	37	67	74
MAY	130	55	76	81	59	121	369	241	150	117	89	55	55	48	60	52	47	48	59	95	92	77	140	148
JUN	91	58	94	104	120	171	243	209	111	76	68	49	73	74	51	47	54	42	47	82	70	78	63	68
JUL	140	134	149	124	120	235	268	245	157	85	68	64	55	52	62	47	44	51	48	82	92	126	114	156
AUG	63	59	78	223	179	125	356	331	213	92	63	62	45	41	27	38	39	74	95	38	63	83	79	60
SEP	74	93	91	132	135	159	136	218	216	137	86	57	44	39	34	26	36	46	58	55	43	62	81	88
OCT	32	39	65	87	56	52	64	103	132	113	70	55	48	39	34	36	54	53	48	45	54	62	58	33
NOV	70	53	91	39	70	64	60	67	98	112	89	56	41	40	39	55	65	75	54	43	35	54	51	52
DEC	38	25	25	36	45	39	32	42	45	63	50	85	72	28	36	39	52	36	34	35	39	23	29	20
Number of intakes:			5	Length of the sampling period:						120	s	Unit:	0.01	µmol mol-1
month\time	0	1	2	3	4	5	6	7	8	9	10	11	12	13	14	15	16	17	18	19	20	21	22	23
JAN	7	7	7	11	13	5	11	9	9	14	12	12	10	7	7	7	8	7	7	5	5	5	5	7
FEB	4	4	3	4	3	5	6	6	8	12	6	5	6	5	5	4	4	4	6	4	5	4	4	4
MAR	5	6	5	6	6	6	5	11	10	8	8	5	6	5	6	5	5	4	4	4	4	6	5	5
APR	17	13	16	12	20	16	25	30	24	18	19	14	12	10	11	7	6	7	8	11	8	9	10	14
MAY	20	13	21	17	18	33	58	44	37	26	26	21	23	23	24	18	12	10	11	18	24	26	43	28
JUN	17	14	21	21	22	26	60	45	27	26	26	25	27	28	24	17	14	9	9	13	14	18	18	19
JUL	36	24	28	30	21	55	75	48	33	28	27	22	23	25	21	15	12	10	14	18	23	27	40	34
AUG	15	16	15	30	34	44	56	65	41	23	17	15	12	12	11	12	12	13	19	10	12	24	17	13
SEP	15	12	23	22	19	32	29	45	51	32	18	12	11	10	9	8	6	8	11	12	13	13	19	12
OCT	9	11	20	18	11	14	11	23	28	27	17	13	13	9	9	7	11	8	9	8	11	14	15	10
NOV	15	13	20	11	13	13	13	14	21	26	22	13	8	8	9	9	15	16	11	11	9	9	11	13
DEC	7	5	5	7	10	8	10	12	9	13	16	22	17	8	9	7	13	9	6	8	7	6	5	5
Number of intakes:			5	Length of the sampling period:						180	s	Unit:	0.01	µmol mol-1
month\time	0	1	2	3	4	5	6	7	8	9	10	11	12	13	14	15	16	17	18	19	20	21	22	23
JAN	10	7	8	11	18	10	15	11	11	17	16	15	15	10	9	9	9	9	6	6	6	6	7	8
FEB	5	6	4	6	5	7	10	6	12	14	9	7	8	7	6	6	6	7	8	6	6	6	6	6
MAR	6	9	7	7	8	7	8	12	11	13	12	9	7	7	7	7	6	6	5	5	5	10	7	7
APR	21	15	15	14	32	21	37	44	32	22	20	16	14	12	10	8	8	10	12	14	10	13	19	17
MAY	31	17	22	19	22	34	87	67	49	40	34	28	28	27	29	24	15	17	15	19	40	37	44	34
JUN	26	20	27	30	31	44	82	55	34	32	28	30	29	31	28	24	17	14	12	20	20	23	18	20
JUL	51	25	38	50	38	89	94	72	54	35	31	32	25	32	29	18	17	15	11	30	30	32	34	46
AUG	17	23	26	46	39	55	85	90	55	27	22	22	13	15	14	13	15	22	26	14	13	25	25	21
SEP	21	13	36	29	36	36	34	68	62	45	27	17	15	13	13	9	8	13	15	17	17	16	24	23
OCT	12	12	20	24	17	15	20	26	35	27	19	16	15	15	12	10	12	11	13	12	13	18	18	12
NOV	18	18	22	17	17	21	20	21	31	31	30	19	12	13	12	13	21	24	14	14	9	15	17	15
DEC	10	8	6	10	11	12	13	11	11	17	18	23	20	10	12	11	15	11	9	10	13	7	9	7
Number of intakes:			5	Length of the sampling period:						240	s	Unit:	0.01	µmol mol-1
month\time	0	1	2	3	4	5	6	7	8	9	10	11	12	13	14	15	16	17	18	19	20	21	22	23
JAN	11	10	10	19	27	10	14	14	15	19	22	20	15	15	12	9	13	9	9	7	9	8	9	11
FEB	7	8	5	7	6	9	11	9	15	18	11	9	10	10	8	8	6	7	10	8	10	8	7	7
MAR	7	10	10	8	9	9	9	16	14	15	11	10	10	8	9	9	8	7	7	7	8	11	11	8
APR	28	23	26	20	35	27	42	62	47	26	28	21	18	15	16	11	10	11	15	19	18	17	22	17
MAY	46	21	37	19	24	42	92	77	63	46	42	29	31	33	37	29	19	19	21	26	36	42	53	54
JUN	32	22	38	35	45	57	80	74	44	36	33	35	36	41	28	26	23	17	16	27	23	31	24	27
JUL	66	33	55	48	47	92	124	90	48	42	35	31	34	33	36	23	21	20	18	36	40	46	56	47
AUG	20	17	23	57	60	64	106	102	82	33	26	25	19	16	15	17	18	22	34	14	19	30	33	24
SEP	26	20	44	52	46	53	49	85	80	60	30	20	19	16	15	11	10	16	21	21	19	20	32	32
OCT	16	14	33	26	20	21	22	38	48	46	29	22	22	16	15	14	18	18	18	15	18	24	20	13
NOV	26	21	30	20	25	21	22	24	35	38	36	20	15	14	12	20	26	24	18	17	13	18	20	25
DEC	11	10	8	11	18	15	16	17	14	21	23	30	31	11	16	16	16	13	11	13	16	8	11	7
Number of intakes:			5	Length of the sampling period:						360	s	Unit:	0.01	µmol mol-1
month\time	0	1	2	3	4	5	6	7	8	9	10	11	12	13	14	15	16	17	18	19	20	21	22	23
JAN	16	11	14	25	25	15	31	24	20	34	33	31	21	20	16	17	21	15	13	11	11	9	13	14
FEB	11	10	8	10	9	14	18	15	20	22	16	12	15	16	10	11	11	12	15	12	14	11	11	10
MAR	12	15	13	13	14	13	14	19	20	22	17	14	13	14	12	12	11	11	11	9	11	18	15	17
APR	36	32	30	35	56	46	65	79	66	34	35	28	23	20	23	14	15	16	24	29	20	22	35	39
MAY	61	23	46	29	37	83	174	112	84	64	57	39	42	38	43	40	28	27	28	41	47	55	90	71
JUN	47	35	54	54	71	65	118	108	60	44	44	39	46	47	38	35	25	26	23	40	36	41	37	42
JUL	60	51	92	55	64	132	159	122	89	56	49	39	40	44	44	29	29	32	25	44	63	60	74	74
AUG	29	45	38	86	65	85	147	150	105	50	38	35	23	23	19	24	25	39	45	26	31	41	45	31
SEP	44	35	65	89	62	79	79	125	114	80	48	26	25	21	18	18	16	22	29	32	28	29	50	36
OCT	18	23	40	42	25	30	33	50	67	67	38	30	28	23	19	20	28	22	24	26	26	39	31	25
NOV	33	26	49	28	32	36	36	36	56	50	51	33	20	22	18	23	38	38	26	24	16	26	26	32
DEC	21	13	14	19	18	25	22	22	18	39	29	44	32	17	22	20	25	19	17	19	24	13	16	10
Number of intakes:			5	Length of the sampling period:						720	s	Unit:	0.01	µmol mol-1
month\time	0	1	2	3	4	5	6	7	8	9	10	11	12	13	14	15	16	17	18	19	20	21	22	23
JAN	31	23	34	62	65	30	50	39	41	61	55	55	47	37	31	32	37	34	28	21	20	21	23	33
FEB	23	22	17	22	19	26	34	30	42	53	36	25	30	29	24	23	24	29	32	27	28	24	26	21
MAR	23	33	31	25	27	27	31	50	39	42	31	23	24	24	23	26	23	21	21	19	23	44	29	29
APR	83	68	74	58	124	93	165	166	140	61	67	57	34	33	37	26	27	35	45	59	39	38	70	79
MAY	134	58	68	83	62	125	380	243	150	122	92	57	58	50	64	56	52	53	61	92	94	77	132	137
JUN	93	59	98	111	130	169	250	210	112	78	73	51	77	80	57	51	55	43	47	83	71	79	69	74
JUL	145	138	160	128	129	222	279	255	165	92	73	65	57	54	64	50	46	53	51	86	98	129	127	165
AUG	65	65	79	230	175	134	356	337	213	95	65	65	45	42	30	40	45	79	96	40	64	85	84	68
SEP	79	94	94	124	138	166	137	236	221	138	90	60	46	40	37	28	36	47	58	59	47	65	88	88
OCT	34	39	68	93	58	53	70	109	134	117	72	57	49	39	36	35	52	54	50	46	56	64	62	34
NOV	69	58	96	46	72	66	65	67	101	119	93	59	42	43	40	55	69	81	55	46	36	55	53	56
DEC	37	27	27	36	48	39	37	43	44	57	55	81	76	31	39	42	53	38	37	35	42	23	30	19

## Sheet: FigS4
ARITMETIC AVERAGE - 90-PERCENTILE OF ABSOLUTE DEVIATIONS
Number of intakes:			2	Length of the sampling period:						100	s	Unit:	0.01	µmol mol-1
month\time	0	1	2	3	4	5	6	7	8	9	10	11	12	13	14	15	16	17	18	19	20	21	22	23		Legend
JAN	6	5	10	9	11	4	10	11	14	15	14	17	9	6	4	4	7	5	7	5	3	6	6	5
FEB	4	4	2	3	3	7	4	4	9	7	5	4	7	7	3	4	4	3	4	3	5	5	4	3			<50
MAR	5	5	5	5	4	5	4	9	13	6	7	6	4	5	4	4	3	3	4	4	3	4	6	4			50-100
APR	15	14	13	16	13	20	25	29	18	16	14	12	14	11	9	6	6	5	7	11	5	9	9	14			100-150
MAY	16	10	24	17	14	27	57	37	29	20	26	17	21	21	19	17	11	8	8	12	17	18	24	16			150-200
JUN	12	13	17	17	32	32	43	49	18	20	30	24	26	23	21	16	15	7	6	11	12	20	15	16			200-300
JUL	38	44	47	32	28	71	70	42	32	29	26	21	23	24	19	15	15	8	11	14	20	31	30	34			300-400
AUG	21	14	13	37	29	29	49	51	34	19	14	15	13	10	10	11	13	14	26	8	8	21	13	14			400-500
SEP	12	10	22	21	28	25	34	61	46	23	14	8	7	7	9	6	6	9	8	8	18	13	10	11			500-600
OCT	8	3	15	15	11	10	12	23	22	23	18	11	9	9	11	5	8	7	4	8	8	10	13	8			>600
NOV	12	16	18	13	10	11	17	14	24	19	17	11	10	7	8	10	15	12	8	8	8	8	9	11
DEC	4	4	6	11	7	7	6	8	6	14	17	22	21	6	6	5	7	7	5	6	6	7	6	6
Number of intakes:			2	Length of the sampling period:						120	s	Unit:	0.01	µmol mol-1
month\time	0	1	2	3	4	5	6	7	8	9	10	11	12	13	14	15	16	17	18	19	20	21	22	23
JAN	11	7	10	10	15	8	8	7	7	13	13	12	20	8	8	4	10	6	6	3	5	5	4	8
FEB	4	4	3	3	3	6	4	4	17	7	8	4	5	6	3	4	4	3	6	5	5	4	4	3
MAR	4	9	4	4	6	8	4	12	6	7	11	7	5	5	6	5	5	3	4	3	4	5	4	4
APR	23	13	13	12	17	17	26	40	26	18	19	13	11	9	7	4	6	6	6	14	7	8	13	12
MAY	35	11	13	13	12	44	76	51	36	27	24	21	20	20	28	19	11	7	9	12	14	25	23	33
JUN	18	15	20	21	30	42	54	24	28	21	25	29	21	24	20	16	11	8	6	11	11	13	14	13
JUL	47	24	35	30	28	58	55	39	30	18	25	29	19	21	19	17	9	8	13	13	18	25	30	33
AUG	23	11	27	26	27	51	49	79	45	17	18	18	12	13	10	10	14	12	13	8	5	14	24	11
SEP	15	10	11	18	22	26	45	52	51	30	15	9	10	8	9	6	6	9	12	11	8	15	21	20
OCT	11	8	18	14	14	13	9	25	26	15	12	15	11	8	16	5	8	6	7	9	9	12	13	9
NOV	13	11	16	11	20	15	18	22	22	20	20	12	8	9	12	11	9	12	8	11	10	11	12	13
DEC	7	5	4	10	24	19	7	14	8	17	16	17	27	6	6	6	9	8	5	8	11	3	4	3
Number of intakes:			2	Length of the sampling period:						150	s	Unit:	0.01	µmol mol-1
month\time	0	1	2	3	4	5	6	7	8	9	10	11	12	13	14	15	16	17	18	19	20	21	22	23
JAN	8	5	6	17	23	6	13	11	10	21	14	14	19	8	6	5	6	7	6	5	5	8	5	8
FEB	4	5	3	3	3	3	9	5	9	13	8	6	9	7	5	4	4	4	4	5	7	5	5	4
MAR	4	7	6	6	7	5	5	11	9	8	8	6	6	7	5	5	5	5	3	3	7	5	4	6
APR	9	20	21	23	21	15	32	41	26	18	25	20	9	11	9	6	5	8	8	11	6	7	10	11
MAY	35	12	24	21	25	38	72	49	28	26	17	22	24	21	26	16	11	10	8	14	34	21	29	33
JUN	39	18	15	29	27	23	51	43	30	21	18	25	29	22	23	18	12	9	11	13	16	20	19	21
JUL	52	46	36	45	21	63	59	56	43	29	27	21	24	22	24	15	9	10	15	15	18	29	24	50
AUG	17	16	12	27	31	41	58	85	51	23	17	18	10	13	11	13	11	13	13	7	15	21	26	11
SEP	13	14	21	24	37	36	32	42	60	31	30	12	9	9	10	9	5	10	13	17	6	14	14	26
OCT	14	6	29	16	9	13	16	44	27	22	18	15	11	13	12	6	9	8	8	7	9	22	9	12
NOV	21	11	19	17	12	10	19	18	31	33	28	14	11	10	7	15	13	14	13	9	10	11	12	12
DEC	6	7	6	7	13	7	8	7	11	14	16	25	19	9	10	10	9	6	6	5	6	6	5	4
Number of intakes:			2	Length of the sampling period:						180	s	Unit:	0.01	µmol mol-1
month\time	0	1	2	3	4	5	6	7	8	9	10	11	12	13	14	15	16	17	18	19	20	21	22	23
JAN	12	6	6	16	11	4	16	10	13	18	21	12	9	10	7	9	8	6	6	6	4	5	7	10
FEB	6	4	4	4	5	5	12	5	13	19	8	5	5	10	8	5	4	4	6	6	5	5	7	6
MAR	4	6	7	6	4	6	4	17	10	11	12	7	6	7	4	5	5	5	5	5	5	9	4	6
APR	25	9	12	11	16	22	23	53	39	18	27	18	17	8	14	8	10	7	8	14	7	10	10	33
MAY	58	10	35	9	12	37	75	49	33	32	27	28	20	29	29	16	12	12	11	13	45	59	19	58
JUN	17	20	21	19	31	43	60	47	29	25	32	31	24	32	27	17	12	15	11	17	11	17	12	26
JUL	42	27	26	26	37	76	78	62	39	22	27	21	28	31	24	17	11	9	13	20	25	21	36	74
AUG	19	13	24	48	27	32	74	77	58	25	24	18	15	12	12	12	9	12	14	9	17	38	19	13
SEP	17	8	12	27	42	22	36	75	79	25	37	17	13	10	9	7	8	12	13	12	14	10	25	17
OCT	8	7	16	19	13	11	15	38	36	30	23	15	11	9	10	8	16	10	7	10	12	26	20	11
NOV	24	9	33	23	9	16	10	18	29	27	27	14	13	12	9	10	30	16	12	10	13	10	12	15
DEC	6	6	5	5	16	12	19	16	12	17	25	28	23	9	12	7	8	9	7	7	8	5	7	9
Number of intakes:			2	Length of the sampling period:						200	s	Unit:	0.01	µmol mol-1
month\time	0	1	2	3	4	5	6	7	8	9	10	11	12	13	14	15	16	17	18	19	20	21	22	23
JAN	14	7	9	8	11	6	13	9	11	21	17	19	8	11	12	5	10	10	6	5	6	6	7	10
FEB	6	4	4	5	5	5	5	6	14	13	7	5	8	9	6	7	5	5	5	7	6	6	6	6
MAR	4	9	5	6	10	6	7	15	10	8	10	9	6	6	6	4	6	5	7	8	6	5	6	6
APR	19	9	16	21	24	23	31	39	37	20	23	16	15	14	12	10	11	7	12	15	8	10	13	13
MAY	45	24	27	19	16	61	83	51	41	36	37	25	25	26	30	21	11	14	10	11	36	15	37	48
JUN	34	36	31	26	20	44	69	44	29	27	25	24	22	33	30	19	17	16	10	14	12	16	27	15
JUL	28	30	30	43	33	119	91	57	36	22	28	29	28	27	25	21	15	13	12	26	30	26	23	27
AUG	17	16	16	42	39	37	58	78	60	24	22	20	17	14	10	10	15	17	24	11	16	26	26	18
SEP	16	15	17	33	47	24	45	50	75	50	29	15	19	10	10	7	6	17	13	10	13	17	19	35
OCT	11	11	22	15	15	10	15	26	28	38	18	17	13	11	14	9	9	7	11	14	11	24	15	10
NOV	16	18	24	18	23	11	24	16	26	29	36	15	9	8	8	13	19	15	15	13	9	15	10	11
DEC	7	6	5	7	7	18	16	10	17	23	22	33	34	8	12	6	9	15	8	7	7	4	5	6
Number of intakes:			2	Length of the sampling period:						225	s	Unit:	0.01	µmol mol-1
month\time	0	1	2	3	4	5	6	7	8	9	10	11	12	13	14	15	16	17	18	19	20	21	22	23
JAN	14	10	11	10	37	5	21	10	9	18	17	18	26	10	8	11	7	7	6	9	6	5	6	9
FEB	6	6	4	4	6	5	7	5	15	25	8	5	12	9	6	7	5	7	8	6	6	5	5	5
MAR	6	9	6	10	4	6	9	17	11	9	9	9	9	8	6	7	7	7	7	4	6	12	6	6
APR	16	15	17	20	15	35	49	62	51	19	18	12	13	13	11	6	13	7	10	15	11	13	15	25
MAY	42	19	33	21	22	47	78	72	42	44	28	27	23	24	28	17	15	12	13	20	44	24	31	22
JUN	13	31	23	28	46	43	62	77	38	22	33	37	30	29	29	20	16	14	12	18	12	17	14	15
JUL	45	23	30	41	30	112	99	79	55	35	29	29	21	27	28	16	14	8	12	25	29	28	34	24
AUG	21	22	13	55	26	38	80	97	58	39	14	24	16	13	13	15	16	11	33	13	20	35	16	13
SEP	27	30	27	45	32	56	37	48	65	48	18	15	15	13	13	10	7	10	19	14	20	29	21	15
OCT	7	11	9	22	14	16	22	31	49	26	25	17	14	12	11	12	13	10	10	10	12	25	35	9
NOV	16	17	24	18	31	19	23	18	32	24	28	18	14	12	10	13	14	18	12	12	12	15	18	15
DEC	6	9	3	11	17	10	17	17	12	23	23	31	27	11	12	12	13	9	10	8	22	6	8	6
Number of intakes:			2	Length of the sampling period:						300	s	Unit:	0.01	µmol mol-1
month\time	0	1	2	3	4	5	6	7	8	9	10	11	12	13	14	15	16	17	18	19	20	21	22	23
JAN	9	10	15	25	28	9	28	14	17	26	16	21	15	14	14	14	9	8	12	7	5	6	9	16
FEB	8	8	6	6	6	7	11	10	16	17	9	9	10	12	7	8	8	7	9	7	10	8	7	6
MAR	6	11	7	7	6	7	9	15	18	12	13	8	10	9	6	7	8	5	7	6	3	8	7	7
APR	64	19	50	22	36	32	51	59	53	27	29	25	19	15	17	10	9	13	13	19	12	17	12	37
MAY	26	13	53	32	20	69	90	83	60	35	43	27	28	31	34	31	17	19	19	24	49	17	108	66
JUN	19	21	39	36	37	31	97	101	41	33	35	39	32	43	48	25	19	18	15	21	21	27	29	28
JUL	34	20	23	35	20	60	94	97	67	43	30	24	26	30	20	17	13	20	21	28	45	47	37	43
AUG	22	26	32	69	54	49	116	115	83	37	32	21	15	19	19	13	19	20	35	13	14	32	29	16
SEP	25	10	38	28	26	47	60	74	86	39	29	18	17	14	13	11	9	14	23	17	12	24	34	25
OCT	12	27	45	23	19	19	19	51	46	38	30	17	22	11	14	11	19	11	15	12	18	23	40	19
NOV	21	24	48	21	23	30	23	23	42	25	51	24	21	20	15	17	25	29	17	14	13	17	20	26
DEC	13	9	6	11	17	13	16	33	20	25	33	41	22	14	12	12	20	19	12	12	8	7	8	10
Number of intakes:			2	Length of the sampling period:						360	s	Unit:	0.01	µmol mol-1
month\time	0	1	2	3	4	5	6	7	8	9	10	11	12	13	14	15	16	17	18	19	20	21	22	23
JAN	12	6	17	21	34	10	22	13	16	21	29	29	15	15	16	11	14	16	10	7	6	8	9	16
FEB	9	10	5	10	7	8	20	10	24	30	10	10	13	11	8	9	9	8	14	12	17	9	9	7
MAR	9	14	11	8	10	14	10	21	18	15	16	10	9	11	9	12	10	8	7	7	8	8	9	10
APR	30	26	20	38	35	40	59	69	51	29	35	22	20	16	19	12	8	13	16	25	13	15	45	25
MAY	51	18	56	37	29	47	159	122	75	42	41	25	31	25	33	33	17	23	16	21	30	67	108	77
JUN	23	36	45	31	54	68	99	58	49	41	31	41	26	35	25	23	22	19	16	25	23	29	34	31
JUL	73	37	46	70	52	150	110	123	78	41	35	34	31	32	40	18	15	17	15	38	34	35	40	42
AUG	22	21	37	96	29	50	115	158	79	42	31	27	21	17	12	14	16	33	33	11	17	28	37	32
SEP	30	27	42	40	58	48	66	103	92	67	35	25	30	17	17	17	7	26	23	21	23	20	34	29
OCT	15	16	24	35	31	19	20	50	86	57	41	22	24	22	24	12	28	14	14	23	26	27	14	23
NOV	32	29	52	19	23	31	27	25	34	43	52	12	19	14	15	21	30	29	20	13	14	18	25	28
DEC	10	11	10	17	17	13	15	26	17	33	26	48	28	16	17	13	19	14	10	13	19	10	7	10
Number of intakes:			2	Length of the sampling period:						450	s	Unit:	0.01	µmol mol-1
month\time	0	1	2	3	4	5	6	7	8	9	10	11	12	13	14	15	16	17	18	19	20	21	22	23
JAN	14	14	14	15	39	12	32	16	18	24	28	22	23	21	16	23	17	16	9	11	13	11	10	16
FEB	10	10	6	8	11	9	14	9	19	28	16	16	19	15	10	10	13	12	17	10	11	12	11	12
MAR	8	15	10	11	10	13	15	24	19	19	26	16	13	11	10	10	11	7	10	8	7	13	14	12
APR	30	26	20	32	40	29	77	86	70	29	34	29	16	15	19	11	12	23	21	26	15	20	38	29
MAY	58	33	39	31	40	77	178	137	78	68	43	40	33	36	33	40	24	28	21	22	44	63	61	105
JUN	32	30	52	91	68	99	155	108	68	61	36	43	44	57	35	33	20	25	27	26	34	48	24	29
JUL	58	20	44	90	46	164	155	162	92	49	36	34	40	46	42	20	27	21	16	43	75	48	67	117
AUG	36	34	38	87	65	79	146	165	105	43	26	29	20	24	17	20	30	36	36	15	17	36	54	43
SEP	40	23	62	48	75	40	79	145	116	72	49	25	37	25	27	15	11	18	21	47	25	23	41	46
OCT	25	19	45	37	35	25	49	47	99	60	32	19	27	23	21	13	20	18	18	20	23	33	27	16
NOV	35	27	41	26	20	40	42	32	57	45	58	42	26	33	17	26	42	42	24	22	10	37	36	23
DEC	17	18	12	22	23	20	31	12	26	29	35	60	30	19	20	21	20	15	16	18	19	14	17	12
Number of intakes:			2	Length of the sampling period:						600	s	Unit:	0.01	µmol mol-1
month\time	0	1	2	3	4	5	6	7	8	9	10	11	12	13	14	15	16	17	18	19	20	21	22	23
JAN	23	27	28	25	41	17	22	35	22	32	35	44	20	33	22	15	39	16	14	12	19	11	18	22
FEB	13	14	11	13	11	14	25	11	28	27	24	17	23	15	16	17	14	17	18	15	14	16	13	13
MAR	14	21	23	14	19	19	15	31	21	27	14	23	16	15	14	19	16	11	12	13	12	16	14	16
APR	26	14	37	48	51	51	91	133	99	43	61	40	33	19	25	17	15	18	24	36	31	19	41	23
MAY	98	37	68	25	47	98	211	153	130	91	63	41	43	45	69	48	29	32	35	34	56	58	116	107
JUN	44	54	82	63	109	107	134	146	77	45	43	41	54	65	34	29	48	35	26	51	36	57	36	58
JUL	98	33	86	50	75	147	162	207	83	75	48	53	49	55	61	42	34	25	28	65	79	71	59	63
AUG	35	25	60	146	94	74	165	213	166	59	39	41	28	17	20	24	31	34	57	16	32	66	66	43
SEP	29	50	82	85	84	53	109	160	147	103	51	36	31	27	24	19	21	24	46	51	21	31	65	72
OCT	23	19	65	32	40	29	45	100	96	74	66	41	41	24	15	28	32	24	30	24	27	60	26	20
NOV	59	36	64	36	56	32	34	35	89	66	72	46	28	27	22	48	57	38	33	21	24	31	34	42
DEC	19	13	18	18	35	22	27	21	38	32	49	54	55	18	32	27	17	15	20	26	28	13	19	10
Number of intakes:			2	Length of the sampling period:						900	s	Unit:	0.01	µmol mol-1
month\time	0	1	2	3	4	5	6	7	8	9	10	11	12	13	14	15	16	17	18	19	20	21	22	23
JAN	31	22	30	42	31	30	64	33	30	55	50	86	23	47	32	42	35	33	31	14	19	13	22	26
FEB	24	20	12	22	16	29	36	19	21	41	32	21	34	38	18	23	25	23	31	19	32	26	23	16
MAR	20	29	23	19	17	21	24	31	34	39	31	26	27	26	20	25	23	21	13	15	18	22	19	31
APR	64	58	40	79	155	85	149	163	192	55	90	57	38	35	31	21	21	26	40	60	25	43	89	120
MAY	95	27	121	58	68	121	474	209	192	99	76	59	75	50	74	57	37	55	40	60	76	30	211	139
JUN	160	53	145	166	170	114	219	258	122	66	79	55	73	81	43	43	33	55	40	60	61	78	53	76
JUL	83	64	176	105	91	217	238	225	163	81	78	47	63	70	67	65	37	37	41	80	120	113	90	99
AUG	50	81	65	141	92	115	299	345	240	86	68	65	44	38	22	34	35	60	61	41	68	51	88	48
SEP	46	45	127	189	68	141	183	262	199	150	117	49	42	33	40	28	35	32	58	68	30	47	103	62
OCT	26	34	63	66	49	56	61	68	142	198	73	48	50	44	31	41	47	32	53	56	45	78	43	69
NOV	76	55	128	34	45	43	67	78	115	99	114	50	38	38	38	43	93	68	41	37	28	62	44	72
DEC	41	28	22	38	38	24	35	28	37	92	50	125	62	27	35	35	37	39	31	42	31	14	25	15
Number of intakes:			2	Length of the sampling period:						1800	s	Unit:	0.01	µmol mol-1
month\time	0	1	2	3	4	5	6	7	8	9	10	11	12	13	14	15	16	17	18	19	20	21	22	23
JAN	44	47	75	78	106	44	113	48	86	128	103	78	76	81	55	41	55	69	60	37	38	30	39	86
FEB	42	46	25	45	36	28	65	37	124	97	77	51	71	60	38	62	60	39	76	46	67	41	51	42
MAR	36	72	74	35	38	58	50	110	68	73	78	49	36	36	41	46	50	32	40	34	31	47	38	55
APR	246	232	155	100	190	126	365	357	435	127	165	101	55	48	32	56	46	58	75	126	50	79	159	158
MAY	283	118	198	160	115	236	716	501	396	237	168	95	89	62	88	83	79	95	101	142	210	114	235	334
JUN	331	107	194	250	283	352	491	458	272	133	127	77	182	155	86	72	86	74	100	117	154	131	101	103
JUL	310	246	283	220	225	472	408	441	262	160	117	102	104	81	103	85	71	66	92	152	130	222	218	195
AUG	107	119	195	472	182	184	656	711	435	168	144	123	73	67	46	57	91	88	199	56	137	130	169	135
SEP	101	191	142	239	275	170	321	439	450	261	150	113	84	87	73	49	67	70	93	101	68	99	165	149
OCT	56	73	104	129	112	89	116	232	293	238	204	103	91	73	58	72	97	70	80	78	116	108	109	52
NOV	92	116	227	68	77	104	95	112	165	228	153	139	82	72	83	125	130	109	100	104	54	114	99	82
DEC	47	52	48	76	118	71	53	76	81	126	107	257	164	71	98	68	76	50	55	82	98	31	33	34
Number of intakes:			3	Length of the sampling period:						100	s	Unit:	0.01	µmol mol-1
month\time	0	1	2	3	4	5	6	7	8	9	10	11	12	13	14	15	16	17	18	19	20	21	22	23
JAN	10	7	10	15	19	7	18	14	11	21	17	16	14	9	8	7	9	8	7	8	7	9	5	10
FEB	6	6	3	4	5	6	8	6	10	23	8	7	9	8	5	6	5	5	5	6	6	6	5	6
MAR	5	8	6	8	8	8	9	14	13	9	11	6	7	7	6	7	5	6	6	5	7	6	6	8
APR	20	17	22	20	23	21	31	45	31	19	28	24	16	14	10	8	9	8	11	13	10	10	19	24
MAY	32	16	21	22	32	41	123	63	40	30	34	27	34	24	43	21	16	13	10	17	38	51	41	46
JUN	43	18	22	22	28	43	67	38	37	29	28	37	33	31	26	21	17	11	15	17	17	23	20	18
JUL	65	27	48	36	30	83	78	64	40	30	38	35	38	30	34	20	16	12	24	23	28	36	35	60
AUG	21	29	22	30	24	40	85	89	60	29	22	22	16	18	15	13	13	19	19	8	20	32	31	24
SEP	34	12	28	26	51	44	33	63	59	37	26	14	13	14	12	11	6	11	14	15	15	20	15	25
OCT	12	11	23	20	16	16	29	42	40	27	27	17	15	15	14	6	11	11	11	8	13	16	19	11
NOV	24	18	21	19	19	16	16	17	34	35	31	22	10	11	10	15	14	16	16	14	14	12	15	17
DEC	10	8	7	8	10	11	10	10	14	12	18	28	24	15	11	9	7	9	8	7	11	6	6	6
Number of intakes:			3	Length of the sampling period:						120	s	Unit:	0.01	µmol mol-1
month\time	0	1	2	3	4	5	6	7	8	9	10	11	12	13	14	15	16	17	18	19	20	21	22	23
JAN	15	10	10	16	24	6	22	15	11	26	21	22	15	12	10	13	10	8	7	6	5	7	9	12
FEB	6	5	4	6	6	5	12	6	15	24	9	7	8	9	6	7	6	6	8	6	7	7	6	6
MAR	6	7	7	7	11	13	6	16	14	11	13	10	7	8	6	6	6	6	5	6	7	8	7	8
APR	27	18	16	19	24	28	37	57	54	22	26	22	16	16	15	10	10	10	10	17	10	12	14	18
MAY	63	20	45	25	22	82	90	58	40	39	38	37	31	28	33	25	17	16	13	16	27	41	33	62
JUN	22	22	27	35	45	57	82	60	36	26	35	32	34	34	34	22	17	15	12	18	16	20	18	22
JUL	64	41	56	45	46	92	98	76	53	25	39	34	34	29	32	25	15	14	15	29	30	34	45	72
AUG	17	21	27	41	23	53	103	119	59	29	34	25	19	19	15	16	14	15	19	18	12	52	24	18
SEP	29	13	27	49	41	39	31	74	82	41	34	20	13	10	13	9	8	15	13	11	16	18	32	15
OCT	13	8	19	26	17	14	24	64	37	37	23	19	16	13	12	10	14	13	9	14	15	29	22	13
NOV	31	17	24	23	17	23	16	22	38	35	25	14	15	12	11	14	38	17	14	13	13	15	14	19
DEC	10	8	9	8	12	16	22	14	15	17	32	33	30	10	15	8	9	9	7	10	11	6	8	9
Number of intakes:			3	Length of the sampling period:						150	s	Unit:	0.01	µmol mol-1
month\time	0	1	2	3	4	5	6	7	8	9	10	11	12	13	14	15	16	17	18	19	20	21	22	23
JAN	14	11	14	13	33	11	23	13	13	19	22	20	25	11	10	9	11	8	7	8	8	7	9	13
FEB	7	7	4	8	7	9	6	8	16	25	12	7	9	9	7	7	5	6	6	7	7	8	7	7
MAR	7	10	13	8	7	13	10	19	16	15	12	13	9	8	7	8	7	7	7	5	7	9	8	9
APR	19	20	22	19	32	26	49	78	52	29	27	20	19	13	15	9	11	10	15	17	16	15	20	26
MAY	52	13	32	40	26	66	108	75	51	45	36	36	33	39	40	23	17	14	15	32	48	26	60	50
JUN	25	33	38	34	59	58	67	72	53	31	40	46	35	34	44	27	17	16	16	17	19	19	21	22
JUL	63	39	62	54	34	116	115	97	60	46	42	45	35	33	33	21	15	10	14	33	33	38	45	44
AUG	28	34	31	66	34	36	91	129	74	46	25	28	18	21	15	17	18	26	39	16	19	41	27	19
SEP	19	29	29	41	36	37	52	65	86	61	24	23	18	14	12	10	9	13	19	20	14	25	32	18
OCT	14	13	24	32	22	22	31	30	46	39	26	24	16	18	19	14	13	11	12	14	18	21	33	16
NOV	20	18	21	24	28	28	28	23	44	37	36	18	16	16	16	17	18	23	17	14	12	15	21	18
DEC	11	9	5	13	19	11	16	15	22	19	31	40	31	12	13	15	15	15	12	11	25	7	10	7
Number of intakes:			3	Length of the sampling period:						200	s	Unit:	0.01	µmol mol-1
month\time	0	1	2	3	4	5	6	7	8	9	10	11	12	13	14	15	16	17	18	19	20	21	22	23
JAN	12	13	23	24	19	10	25	18	17	33	27	28	20	19	15	15	23	12	13	8	7	9	12	17
FEB	9	9	7	8	7	11	12	10	18	21	12	11	15	11	10	10	8	7	12	9	11	8	7	8
MAR	7	12	9	10	6	10	8	23	19	16	16	10	11	11	8	9	10	7	8	7	10	9	8	9
APR	18	31	41	33	38	38	68	72	61	38	32	28	22	19	21	13	13	12	16	22	14	20	16	30
MAY	33	21	52	36	35	90	138	110	64	41	44	34	43	32	46	35	18	20	18	33	90	29	128	52
JUN	27	23	36	44	54	50	107	99	59	38	48	42	42	39	43	29	27	24	19	22	26	31	33	28
JUL	40	28	50	57	32	107	116	110	68	49	42	37	30	36	33	25	18	21	25	36	57	53	65	66
AUG	27	21	27	56	46	39	139	162	103	42	36	27	20	23	22	16	22	24	36	14	18	37	29	22
SEP	34	15	42	43	37	46	70	76	91	63	37	23	19	19	17	14	11	21	28	23	22	18	38	31
OCT	20	22	57	33	29	24	25	53	48	43	38	27	27	18	20	15	24	16	20	13	22	39	27	20
NOV	27	29	45	22	31	30	28	31	38	46	61	26	20	16	21	20	27	29	22	20	18	18	22	33
DEC	12	11	7	12	26	14	20	27	31	25	30	45	33	16	17	12	15	19	14	14	10	9	9	11
Number of intakes:			3	Length of the sampling period:						240	s	Unit:	0.01	µmol mol-1
month\time	0	1	2	3	4	5	6	7	8	9	10	11	12	13	14	15	16	17	18	19	20	21	22	23
JAN	17	7	28	24	25	10	24	21	19	34	30	34	19	18	19	14	19	15	12	10	8	8	12	19
FEB	10	11	7	12	10	9	20	11	24	32	14	13	13	14	11	13	10	11	14	13	13	10	13	9
MAR	8	13	14	10	13	16	14	23	21	17	20	14	12	14	10	14	12	9	11	8	11	12	11	11
APR	30	31	23	41	42	43	62	85	61	39	39	27	23	21	19	13	11	14	17	26	17	20	29	33
MAY	79	24	58	34	34	56	146	127	81	48	58	35	36	32	46	37	22	27	21	29	46	51	79	81
JUN	30	25	52	49	63	74	118	79	48	37	37	46	46	52	38	37	29	25	20	32	22	32	32	38
JUL	69	58	76	97	80	155	215	121	86	44	44	46	45	41	48	24	21	21	24	47	50	43	59	76
AUG	25	23	43	92	54	62	141	167	102	42	39	34	27	23	17	22	18	40	39	16	30	27	42	36
SEP	34	34	45	42	55	93	71	101	128	78	57	27	30	19	19	19	11	27	31	28	24	23	56	25
OCT	24	19	32	39	29	23	31	51	94	64	37	25	22	22	21	14	35	22	17	23	31	34	14	21
NOV	45	30	54	26	27	34	39	27	38	48	48	31	24	20	21	23	40	34	24	20	22	27	28	34
DEC	12	15	12	19	20	13	29	24	20	25	34	82	47	21	24	18	24	19	14	16	18	11	12	15
Number of intakes:			3	Length of the sampling period:						300	s	Unit:	0.01	µmol mol-1
month\time	0	1	2	3	4	5	6	7	8	9	10	11	12	13	14	15	16	17	18	19	20	21	22	23
JAN	19	15	16	17	52	12	41	20	20	42	33	31	32	24	20	18	20	19	14	13	12	11	14	24
FEB	12	13	7	11	11	12	13	14	27	39	20	15	14	17	12	12	13	14	17	11	12	15	12	14
MAR	11	18	12	12	14	11	15	26	21	22	25	19	15	13	13	13	13	12	10	11	8	11	13	15
APR	46	34	24	33	65	43	98	112	80	39	32	37	28	21	19	11	16	17	24	31	22	21	32	39
MAY	59	25	47	28	45	99	200	159	87	78	57	51	41	43	45	48	24	33	30	23	69	47	73	96
JUN	49	40	71	57	86	99	153	130	83	52	47	55	52	70	50	42	22	28	24	43	38	56	25	32
JUL	83	31	68	106	72	133	208	160	133	60	58	52	43	67	60	30	34	22	20	59	75	59	76	96
AUG	38	47	54	120	64	102	181	185	121	53	44	36	19	31	21	23	36	37	52	19	22	46	50	38
SEP	38	41	52	65	80	62	80	125	114	78	57	35	34	24	29	18	13	26	32	39	37	30	50	38
OCT	24	23	33	42	30	26	43	59	71	61	39	30	30	27	22	19	24	20	25	25	28	49	40	21
NOV	30	35	51	36	41	51	41	38	66	60	73	39	27	32	17	34	46	46	28	24	14	36	34	30
DEC	16	19	12	19	34	21	35	21	27	32	47	74	34	21	24	21	25	17	19	15	30	13	19	14
Number of intakes:			3	Length of the sampling period:						400	s	Unit:	0.01	µmol mol-1
month\time	0	1	2	3	4	5	6	7	8	9	10	11	12	13	14	15	16	17	18	19	20	21	22	23
JAN	22	18	27	33	75	18	32	30	28	34	38	56	26	38	24	15	19	19	19	16	21	15	18	31
FEB	16	17	12	14	12	13	29	16	41	35	25	22	23	22	17	18	16	15	21	17	21	17	16	15
MAR	16	22	22	18	17	19	15	33	28	30	19	22	23	14	15	22	18	13	14	17	12	19	18	16
APR	37	57	52	54	73	57	114	158	94	54	69	44	33	27	32	18	15	24	29	43	38	32	56	42
MAY	113	35	72	34	60	87	183	188	130	93	74	49	50	55	82	54	31	43	44	47	70	85	121	105
JUN	55	50	105	58	126	129	175	172	100	67	60	62	64	70	54	47	47	38	32	48	49	62	39	53
JUL	109	42	124	89	93	232	252	196	97	89	70	49	67	66	71	45	41	28	37	72	91	85	78	85
AUG	42	33	67	166	100	108	221	261	192	77	58	49	34	27	26	31	37	33	68	23	38	58	69	48
SEP	35	55	69	121	120	86	133	193	170	134	66	42	30	36	30	22	22	25	55	56	29	39	71	44
OCT	32	24	85	47	52	39	46	81	114	83	63	46	48	28	24	30	43	30	39	27	35	64	33	27
NOV	58	57	75	36	52	44	40	47	75	68	79	47	26	28	28	54	74	54	42	25	21	33	47	48
DEC	21	19	20	21	49	27	37	35	38	38	55	62	54	26	36	39	33	24	22	23	20	16	24	13
Number of intakes:			3	Length of the sampling period:						600	s	Unit:	0.01	µmol mol-1
month\time	0	1	2	3	4	5	6	7	8	9	10	11	12	13	14	15	16	17	18	19	20	21	22	23
JAN	35	25	48	48	44	24	76	44	42	74	72	52	44	41	33	33	31	35	33	26	21	15	24	33
FEB	29	26	17	21	20	27	44	23	39	49	39	25	30	42	22	24	26	23	34	22	30	30	26	19
MAR	27	37	24	24	22	22	28	34	36	41	36	29	30	30	25	30	28	23	19	17	25	24	24	37
APR	85	61	51	114	132	94	156	208	181	58	102	62	42	40	27	27	26	33	46	75	33	34	106	90
MAY	153	44	106	55	69	124	429	281	165	137	94	71	78	58	91	64	50	68	56	55	120	88	229	115
JUN	101	79	171	121	197	146	281	277	130	88	77	67	92	80	60	59	45	60	48	68	73	100	71	71
JUL	109	80	241	126	116	247	271	254	200	105	97	75	66	74	82	61	52	47	51	80	137	134	118	169
AUG	68	96	85	241	102	146	336	407	256	95	71	77	36	44	33	48	55	73	84	45	36	63	104	68
SEP	82	73	137	182	178	151	217	264	240	192	104	50	55	36	42	31	36	38	69	65	41	61	112	62
OCT	38	38	78	78	44	63	63	115	145	131	91	65	49	50	37	42	55	43	56	64	55	84	61	49
NOV	77	65	127	55	62	65	79	83	136	124	99	60	40	46	41	43	93	84	48	51	32	55	62	70
DEC	42	37	28	39	52	33	47	30	50	66	62	146	79	35	46	35	45	38	36	27	48	22	31	21
Number of intakes:			3	Length of the sampling period:						1200	s	Unit:	0.01	µmol mol-1
month\time	0	1	2	3	4	5	6	7	8	9	10	11	12	13	14	15	16	17	18	19	20	21	22	23
JAN	68	46	52	92	114	55	104	76	96	154	105	88	118	77	61	55	54	85	65	38	46	43	43	95
FEB	53	55	36	49	44	40	79	48	102	106	83	57	74	86	51	55	50	50	58	50	67	52	60	43
MAR	46	85	64	51	48	70	59	115	72	87	65	57	49	54	54	59	60	39	46	38	49	55	44	64
APR	183	257	187	96	296	162	375	395	426	133	144	115	73	65	51	54	60	73	98	147	68	93	177	206
MAY	345	92	164	185	140	211	913	621	334	248	180	126	119	78	125	114	83	110	112	198	218	118	348	357
JUN	286	141	174	273	350	380	513	530	295	177	172	89	154	160	107	98	114	96	101	150	151	147	125	141
JUL	247	251	324	239	197	468	496	561	341	196	138	135	113	120	119	88	83	75	120	202	177	264	247	404
AUG	160	160	185	350	298	241	666	723	503	189	151	155	77	80	52	68	113	141	228	80	101	143	159	111
SEP	138	204	175	335	311	272	390	467	490	342	199	146	101	85	88	51	92	83	116	75	85	130	184	170
OCT	63	92	153	181	123	115	143	232	312	280	169	112	106	88	68	85	122	86	95	91	135	158	119	68
NOV	167	141	256	78	172	138	135	119	245	247	205	127	77	102	88	133	159	148	114	115	78	140	108	102
DEC	60	74	62	96	102	64	80	83	85	122	148	304	173	74	105	72	107	74	72	55	68	49	55	41
Number of intakes:			4	Length of the sampling period:						100	s	Unit:	0.01	µmol mol-1
month\time	0	1	2	3	4	5	6	7	8	9	10	11	12	13	14	15	16	17	18	19	20	21	22	23
JAN	14	9	16	21	15	9	23	18	17	27	40	26	12	12	11	9	11	13	13	8	8	10	8	11
FEB	7	7	5	6	5	6	8	8	19	16	11	8	10	10	7	8	7	7	9	8	8	9	7	8
MAR	6	10	8	10	9	10	10	18	14	12	13	12	8	9	7	6	6	7	7	9	9	7	8	9
APR	27	22	20	22	27	28	49	60	49	27	28	27	23	14	16	12	14	9	13	22	14	16	18	25
MAY	57	31	47	33	29	80	107	66	42	46	42	37	35	43	38	31	21	20	13	20	45	34	58	61
JUN	35	33	37	30	40	52	88	59	38	35	48	36	45	47	35	28	22	14	11	20	21	31	35	24
JUL	65	42	69	63	38	137	148	69	54	46	44	51	50	46	37	30	24	16	18	28	33	50	55	80
AUG	34	16	35	65	47	51	93	106	77	33	26	32	23	23	19	18	23	25	31	16	23	42	32	19
SEP	18	25	28	36	42	51	57	85	90	51	38	19	19	14	15	11	9	18	18	24	24	27	21	41
OCT	16	14	30	23	18	16	25	49	45	42	25	20	23	16	14	10	15	11	16	20	15	23	21	16
NOV	21	27	41	24	32	24	26	30	43	41	45	22	15	14	13	17	27	21	17	18	13	19	19	19
DEC	11	8	9	13	19	23	17	18	18	21	27	33	36	14	15	11	13	13	10	12	13	9	9	10
Number of intakes:			4	Length of the sampling period:						150	s	Unit:	0.01	µmol mol-1
month\time	0	1	2	3	4	5	6	7	8	9	10	11	12	13	14	15	16	17	18	19	20	21	22	23
JAN	13	15	15	24	29	9	34	19	19	42	26	24	23	16	17	18	21	14	14	9	10	12	9	15
FEB	8	10	6	8	7	13	13	11	24	20	14	13	12	11	10	11	10	8	12	9	12	9	9	9
MAR	9	13	10	13	10	10	11	23	25	19	14	12	11	11	10	9	10	8	8	8	12	9	9	11
APR	64	23	40	36	47	43	70	75	53	38	39	30	24	22	22	14	13	14	16	23	18	19	19	30
MAY	45	24	54	41	40	92	144	111	65	46	49	46	42	44	45	39	24	21	22	32	83	33	115	96
JUN	35	24	47	47	63	50	117	109	61	49	52	49	53	46	48	36	26	21	16	25	26	38	37	36
JUL	82	42	56	83	37	106	134	129	79	60	52	39	40	46	45	26	22	19	23	40	64	54	93	79
AUG	35	39	37	95	54	70	131	130	110	52	36	30	20	25	24	19	22	27	44	17	27	48	39	24
SEP	22	22	51	44	55	68	80	96	105	75	39	28	21	21	20	15	12	20	27	27	20	30	41	30
OCT	21	16	55	39	30	29	28	56	66	48	45	30	28	19	20	13	22	15	21	15	25	34	30	19
NOV	32	32	47	25	36	32	29	35	44	48	63	28	23	20	23	22	27	33	26	19	18	19	24	27
DEC	12	11	10	16	24	16	21	29	29	34	40	64	39	17	17	15	24	17	14	19	12	10	7	11
Number of intakes:			4	Length of the sampling period:						180	s	Unit:	0.01	µmol mol-1
month\time	0	1	2	3	4	5	6	7	8	9	10	11	12	13	14	15	16	17	18	19	20	21	22	23
JAN	16	9	22	30	34	11	26	19	20	30	28	26	20	20	17	13	15	16	11	9	9	10	14	19
FEB	11	12	7	11	10	11	19	10	31	22	15	14	14	11	11	12	11	10	15	12	14	11	12	9
MAR	10	16	14	8	19	14	13	25	22	21	21	14	11	14	11	14	11	8	10	9	11	14	11	12
APR	34	31	31	41	54	38	65	87	65	43	38	28	32	23	26	16	14	19	18	31	21	21	43	43
MAY	66	23	65	39	38	69	165	143	88	55	60	41	46	45	49	44	24	26	22	31	53	44	102	120
JUN	39	25	56	60	72	95	111	84	59	49	54	57	48	51	52	38	35	22	18	34	27	34	32	38
JUL	93	63	77	76	105	143	170	129	88	50	52	55	51	55	48	28	22	23	22	47	61	51	56	104
AUG	33	36	50	89	63	83	132	149	114	50	47	43	33	25	22	22	19	38	45	17	26	47	45	35
SEP	33	23	51	47	89	94	77	108	125	79	60	35	31	21	21	18	12	23	31	29	32	25	62	35
OCT	20	24	37	42	29	21	23	50	95	71	38	33	28	25	27	19	28	22	20	24	28	39	19	25
NOV	49	39	58	30	36	30	36	33	54	57	68	28	23	24	21	25	38	37	26	21	23	27	27	39
DEC	21	12	13	19	25	22	22	27	19	34	38	72	50	21	26	19	29	22	15	18	19	12	18	15
Number of intakes:			4	Length of the sampling period:						225	s	Unit:	0.01	µmol mol-1
month\time	0	1	2	3	4	5	6	7	8	9	10	11	12	13	14	15	16	17	18	19	20	21	22	23
JAN	20	22	21	21	66	14	40	23	23	48	37	38	36	24	23	18	15	20	13	12	12	12	16	19
FEB	12	13	8	12	13	11	22	14	31	39	20	14	18	14	12	13	12	16	16	14	14	14	13	12
MAR	12	20	12	12	11	15	17	26	23	26	22	22	14	15	14	16	15	13	11	13	11	17	15	17
APR	44	29	34	48	49	53	89	113	97	41	37	39	30	25	20	14	17	19	26	33	22	26	43	44
MAY	79	29	55	38	57	96	227	167	89	82	61	57	49	54	52	51	30	36	31	38	100	67	104	82
JUN	61	47	54	85	95	95	182	130	79	68	55	60	59	69	53	47	34	29	29	42	42	56	31	37
JUL	116	42	72	123	70	196	226	177	117	75	64	58	52	58	73	34	38	25	24	62	73	71	79	98
AUG	38	42	49	101	84	117	184	200	127	56	44	48	27	27	25	29	34	37	56	26	24	59	58	48
SEP	46	34	55	69	90	55	85	137	148	90	67	38	35	28	30	18	13	26	34	44	43	34	46	36
OCT	26	30	52	54	36	39	55	60	84	65	43	32	35	29	28	24	27	23	31	28	30	56	44	18
NOV	42	40	52	34	44	50	47	36	68	60	67	37	31	28	20	30	40	46	33	29	17	40	39	35
DEC	19	18	13	24	33	31	34	26	29	30	51	86	49	24	27	23	24	17	18	18	29	16	21	15
Number of intakes:			4	Length of the sampling period:						300	s	Unit:	0.01	µmol mol-1
month\time	0	1	2	3	4	5	6	7	8	9	10	11	12	13	14	15	16	17	18	19	20	21	22	23
JAN	23	26	25	41	63	20	46	33	28	46	45	52	31	35	32	17	27	20	17	18	18	15	21	29
FEB	18	17	13	15	14	19	27	16	33	40	27	22	24	22	18	18	15	15	21	18	21	17	17	15
MAR	17	20	24	18	19	22	19	31	33	32	22	25	18	17	16	20	18	13	14	17	15	18	18	17
APR	56	69	59	55	78	66	102	155	108	58	70	47	43	26	34	20	17	21	30	40	37	37	55	43
MAY	116	35	85	35	60	80	187	172	143	97	77	54	59	63	77	54	37	41	47	50	72	57	63	113
JUN	58	43	129	65	113	135	177	184	104	80	66	61	70	75	60	51	47	39	33	53	52	69	46	59
JUL	131	63	172	84	87	177	243	231	110	99	82	65	65	69	63	48	45	30	31	84	116	87	104	89
AUG	52	43	71	153	132	135	225	230	212	71	60	55	43	37	29	34	34	43	74	24	43	73	76	50
SEP	44	59	94	124	132	96	137	184	180	134	71	43	41	37	34	26	21	30	58	58	33	42	88	67
OCT	30	33	100	54	40	44	48	105	110	83	61	43	46	30	29	28	43	33	43	31	39	74	40	32
NOV	45	56	72	46	62	48	45	51	85	80	92	46	24	26	29	54	52	54	41	33	28	35	44	56
DEC	20	21	19	27	43	30	36	42	41	64	63	88	88	30	41	35	30	29	23	24	27	18	25	13
Number of intakes:			4	Length of the sampling period:						450	s	Unit:	0.01	µmol mol-1
month\time	0	1	2	3	4	5	6	7	8	9	10	11	12	13	14	15	16	17	18	19	20	21	22	23
JAN	34	26	34	51	60	26	67	40	42	98	70	41	40	48	31	35	42	35	33	22	21	19	27	39
FEB	25	23	18	21	23	31	47	26	60	55	36	29	38	38	23	23	23	25	31	24	33	22	27	21
MAR	29	35	27	27	28	30	29	39	43	44	40	33	32	33	27	31	31	22	26	18	21	26	25	41
APR	104	70	67	120	113	99	168	181	195	73	114	68	41	39	37	27	29	35	49	78	45	48	105	94
MAY	127	57	124	83	87	185	435	291	174	133	103	73	77	65	86	78	60	58	54	79	118	88	212	163
JUN	140	85	137	97	199	135	295	275	129	100	102	72	89	88	72	67	51	68	52	76	70	84	105	71
JUL	128	70	246	127	125	285	290	279	193	113	98	71	81	89	84	62	57	51	55	92	144	129	130	168
AUG	73	99	71	270	123	174	373	392	271	99	76	78	46	47	37	47	57	77	83	49	70	80	115	73
SEP	85	81	140	256	154	158	226	251	245	174	112	59	58	42	40	34	35	48	70	52	57	67	95	64
OCT	46	45	73	90	47	69	75	137	163	138	95	64	55	48	33	44	65	44	54	50	57	108	57	48
NOV	88	78	113	62	66	75	79	95	128	138	121	65	43	48	43	54	84	90	60	55	38	49	68	78
DEC	44	32	29	40	49	41	55	41	47	71	64	135	75	39	52	37	47	42	34	31	38	28	33	24
Number of intakes:			4	Length of the sampling period:						900	s	Unit:	0.01	µmol mol-1
month\time	0	1	2	3	4	5	6	7	8	9	10	11	12	13	14	15	16	17	18	19	20	21	22	23
JAN	71	50	63	111	134	57	92	75	92	157	114	99	85	99	67	66	84	84	65	44	45	45	42	97
FEB	57	55	34	52	44	47	66	61	138	136	86	56	60	65	55	59	58	54	68	63	70	45	66	46
MAR	46	80	71	53	59	74	62	137	74	85	70	55	53	53	51	66	64	40	45	45	47	70	52	68
APR	306	213	166	132	364	221	373	400	390	133	184	119	86	64	59	51	55	74	99	157	76	95	176	180
MAY	343	110	187	254	144	178	953	646	325	267	196	129	122	80	140	125	105	99	123	191	217	134	298	385
JUN	252	138	181	288	354	383	609	557	259	179	168	107	174	165	111	88	129	104	99	152	139	171	124	147
JUL	302	236	311	307	237	544	553	585	338	211	143	119	133	129	131	98	101	86	107	222	191	251	266	350
AUG	147	132	210	699	306	269	798	768	525	183	151	149	93	76	59	80	104	145	201	90	114	166	205	144
SEP	162	218	206	295	269	317	406	509	547	323	196	160	111	89	87	55	80	99	143	116	77	149	181	166
OCT	77	96	169	178	120	117	153	249	317	289	160	129	107	88	65	81	117	98	101	125	128	166	128	93
NOV	157	146	239	78	171	147	144	144	239	288	227	140	88	92	96	148	135	164	120	109	75	139	117	132
DEC	64	73	56	74	100	83	73	83	108	148	142	239	166	75	80	82	88	73	73	60	85	44	59	47
Number of intakes:			5	Length of the sampling period:						120	s	Unit:	0.01	µmol mol-1
month\time	0	1	2	3	4	5	6	7	8	9	10	11	12	13	14	15	16	17	18	19	20	21	22	23
JAN	15	14	21	25	39	10	23	22	25	37	30	33	22	18	18	19	24	16	16	10	10	12	12	17
FEB	9	9	6	8	7	13	15	11	21	27	15	13	14	13	10	11	10	10	13	10	10	10	9	8
MAR	10	13	12	13	10	13	10	23	25	18	17	12	11	12	10	10	11	9	11	9	9	11	10	11
APR	39	32	45	26	45	38	68	78	59	42	43	34	29	24	22	15	15	15	17	29	21	22	23	29
MAY	38	27	57	48	43	97	159	107	75	51	56	49	49	48	52	40	22	24	24	36	57	68	125	60
JUN	42	29	50	49	47	71	122	100	67	57	59	53	57	60	54	36	34	21	19	26	30	38	35	41
JUL	81	46	64	78	51	129	150	106	75	55	58	51	48	54	45	33	25	20	32	36	66	56	82	76
AUG	45	41	41	55	65	89	124	160	107	49	36	36	23	26	23	23	23	30	45	19	22	59	47	32
SEP	44	24	56	51	46	74	77	132	102	64	37	29	22	21	22	17	11	21	25	30	36	24	38	23
OCT	22	34	57	41	28	40	26	51	67	48	46	31	29	19	17	15	22	18	22	16	24	39	40	23
NOV	39	31	56	27	38	28	29	32	60	51	56	31	23	22	24	21	31	35	24	24	20	19	24	34
DEC	16	11	10	18	24	17	23	31	29	30	44	62	44	19	19	17	23	22	13	15	14	11	9	11
Number of intakes:			5	Length of the sampling period:						180	s	Unit:	0.01	µmol mol-1
month\time	0	1	2	3	4	5	6	7	8	9	10	11	12	13	14	15	16	17	18	19	20	21	22	23
JAN	23	16	23	24	55	19	43	25	23	44	38	38	31	25	22	21	18	21	12	13	14	12	15	21
FEB	13	14	10	14	12	14	18	12	27	39	23	16	20	14	13	14	13	17	19	14	14	15	14	15
MAR	13	17	15	16	14	14	17	28	25	26	29	22	14	15	15	16	14	12	12	13	10	14	16	18
APR	58	35	42	31	62	52	96	119	90	49	47	40	33	27	24	16	18	21	27	32	23	25	43	57
MAY	65	24	54	42	55	109	210	156	103	84	68	55	56	62	54	52	33	36	32	46	91	64	116	92
JUN	64	43	70	68	92	98	188	131	83	69	56	70	58	70	64	51	38	29	27	42	41	52	33	41
JUL	154	56	84	129	96	215	250	181	124	72	64	68	52	69	72	32	38	26	24	62	86	62	61	102
AUG	37	61	59	111	79	120	175	219	129	56	49	48	29	32	28	28	40	49	55	27	24	60	60	47
SEP	32	34	75	57	94	80	84	166	160	100	62	37	38	28	31	20	14	25	33	54	47	36	52	52
OCT	29	20	49	58	31	37	49	59	95	69	43	35	33	32	27	23	27	26	30	28	29	54	47	26
NOV	47	46	56	40	43	52	49	42	76	72	78	42	28	35	28	32	45	53	33	30	20	38	40	36
DEC	19	19	14	28	29	23	34	23	25	34	57	69	53	24	31	26	24	19	20	18	30	17	20	15
Number of intakes:			5	Length of the sampling period:						240	s	Unit:	0.01	µmol mol-1
month\time	0	1	2	3	4	5	6	7	8	9	10	11	12	13	14	15	16	17	18	19	20	21	22	23
JAN	25	26	29	41	73	20	40	32	34	49	66	55	32	38	31	18	24	21	21	17	21	18	19	31
FEB	18	18	12	15	15	22	24	17	43	41	28	21	25	22	21	20	16	16	21	19	21	19	14	16
MAR	17	21	25	15	20	19	20	37	33	34	25	24	21	18	16	25	18	15	15	16	17	21	19	19
APR	74	63	71	58	96	61	95	166	116	63	74	51	51	36	33	25	19	21	32	44	39	35	61	40
MAY	121	44	86	42	61	75	227	192	140	98	86	64	64	68	82	60	38	44	48	46	84	71	148	138
JUN	83	50	88	78	138	129	209	167	101	75	72	72	77	86	62	57	50	39	36	58	50	67	47	66
JUL	166	62	159	113	95	245	297	234	109	91	74	64	77	74	73	51	47	32	31	83	117	96	138	122
AUG	53	37	62	138	133	123	240	283	200	70	59	57	40	31	31	39	44	44	85	30	36	72	72	58
SEP	48	63	91	119	92	112	138	194	199	141	69	45	38	36	31	26	21	30	55	60	49	39	90	65
OCT	32	31	76	54	38	48	58	105	113	98	70	47	53	30	28	31	47	36	45	32	41	76	64	30
NOV	53	51	76	46	65	47	48	51	72	86	93	52	31	30	28	53	52	49	43	34	30	41	47	55
DEC	25	22	20	30	58	30	40	38	44	72	63	94	67	26	35	37	28	27	23	25	26	17	21	15
Number of intakes:			5	Length of the sampling period:						360	s	Unit:	0.01	µmol mol-1
month\time	0	1	2	3	4	5	6	7	8	9	10	11	12	13	14	15	16	17	18	19	20	21	22	23
JAN	32	28	40	54	73	31	73	63	42	101	71	78	52	47	33	40	51	38	32	22	24	19	28	38
FEB	25	24	19	26	26	32	42	25	60	47	36	26	37	46	25	26	25	24	34	25	35	26	28	20
MAR	29	35	29	28	27	25	28	53	47	47	39	36	30	32	29	31	29	22	27	21	23	27	26	42
APR	73	91	86	106	164	96	181	219	192	80	100	69	52	48	43	28	24	34	54	73	46	47	104	111
MAY	134	48	137	77	88	205	498	301	180	136	127	82	85	79	97	91	58	59	59	71	116	116	251	164
JUN	157	89	142	131	227	156	283	301	146	97	95	90	93	102	75	76	53	65	49	80	74	89	69	91
JUL	130	94	237	122	145	301	335	272	219	119	98	80	84	92	91	66	55	51	54	97	135	130	146	162
AUG	51	93	89	223	158	162	350	393	270	109	77	79	53	56	40	47	61	70	102	55	63	90	107	73
SEP	83	83	132	203	160	160	225	268	270	163	121	63	60	47	43	38	37	49	66	78	68	66	111	63
OCT	45	52	90	89	53	71	74	130	187	152	86	69	56	47	42	47	66	44	53	58	59	101	71	64
NOV	81	78	127	73	75	81	79	97	135	118	127	72	43	47	41	56	87	88	59	52	35	57	66	85
DEC	48	31	30	38	49	47	54	38	42	82	82	140	75	38	52	41	45	47	32	34	40	28	35	25
Number of intakes:			5	Length of the sampling period:						720	s	Unit:	0.01	µmol mol-1
month\time	0	1	2	3	4	5	6	7	8	9	10	11	12	13	14	15	16	17	18	19	20	21	22	23
JAN	67	52	70	119	146	65	130	79	98	157	137	107	104	88	70	65	69	87	62	46	44	41	47	89
FEB	54	60	41	51	44	56	83	57	109	131	90	59	59	69	56	64	61	62	76	57	68	52	70	46
MAR	48	74	72	50	45	62	60	133	79	90	74	58	52	53	53	63	68	41	49	48	51	72	56	67
APR	292	243	202	189	345	235	398	436	402	141	197	125	86	74	65	63	56	81	105	167	86	88	193	194
MAY	375	125	193	250	144	218	1001	652	351	280	214	132	131	98	144	120	107	98	129	198	251	153	302	372
JUN	272	139	189	248	324	394	612	538	272	179	171	111	191	178	131	101	125	106	104	156	149	181	129	159
JUL	291	298	413	345	245	534	609	590	364	206	147	142	149	114	154	106	108	89	107	219	207	247	289	411
AUG	176	148	208	720	369	295	777	774	578	192	152	148	94	85	62	84	118	131	224	89	127	169	197	171
SEP	206	206	203	277	293	438	326	507	504	388	191	167	110	89	97	60	92	97	132	146	100	148	199	179
OCT	76	95	188	206	138	123	166	283	325	295	184	132	103	87	77	87	101	106	105	119	121	184	125	100
NOV	149	141	232	98	200	149	169	146	237	279	226	143	99	112	82	157	154	174	126	115	82	128	112	128
DEC	62	64	61	92	112	89	84	92	98	130	152	202	180	84	116	83	95	84	84	58	69	54	72	45

## Sheet: FigS5
LINEAR INTERPOLATION - MEDIAN OF ABSOLUTE DEVIATIONS
Number of intakes:			2	Length of the sampling period:						100	s	Unit:	0.01	µmol mol-1
month\time	0	1	2	3	4	5	6	7	8	9	10	11	12	13	14	15	16	17	18	19	20	21	22	23		Legend
JAN	2	2	2	3	5	2	4	5	3	4	6	5	3	2	2	2	2	3	2	2	1	3	2	2
FEB	1	1	1	1	1	1	1	2	3	2	2	1	2	2	1	1	1	1	2	1	1	1	1	1			<50
MAR	2	2	1	2	2	2	2	3	3	2	3	2	2	2	1	2	1	1	2	2	2	1	2	2			50-100
APR	5	6	5	6	6	6	10	7	5	6	6	5	5	4	4	2	2	2	2	3	3	4	3	5			100-150
MAY	8	4	7	7	5	11	18	9	8	8	10	9	8	9	9	7	5	3	2	5	4	11	10	4			150-200
JUN	6	6	7	6	8	13	20	12	7	12	13	11	11	11	8	6	5	2	2	4	5	7	7	6			200-300
JUL	19	20	13	14	9	32	32	12	10	11	11	9	11	10	9	6	5	2	3	3	6	13	11	11			300-400
AUG	8	6	7	12	10	11	22	17	12	6	5	6	5	5	5	4	6	3	6	4	5	6	4	6			400-500
SEP	4	3	6	8	9	8	8	20	17	7	5	3	3	3	3	2	2	3	3	4	6	5	3	4			500-600
OCT	4	2	5	5	5	4	4	9	7	8	5	4	3	3	5	1	1	3	2	3	3	4	5	4			>600
NOV	5	5	7	5	4	6	5	4	8	8	6	4	3	3	3	3	4	5	3	4	3	3	4	3
DEC	2	2	2	2	3	2	2	3	3	3	4	7	4	2	3	2	2	3	2	2	3	3	2	3
Number of intakes:			2	Length of the sampling period:						120	s	Unit:	0.01	µmol mol-1
month\time	0	1	2	3	4	5	6	7	8	9	10	11	12	13	14	15	16	17	18	19	20	21	22	23
JAN	4	2	2	6	6	2	3	3	3	4	5	5	4	2	1	2	3	2	2	2	2	2	2	3
FEB	1	1	1	1	1	1	1	2	5	3	2	1	2	2	1	1	1	1	1	1	1	1	1	1
MAR	1	2	2	2	2	2	2	4	2	3	4	2	2	2	2	2	1	1	1	1	1	1	1	2
APR	7	5	6	4	5	6	7	10	7	7	6	6	5	4	4	3	2	2	2	4	2	3	3	6
MAY	10	7	4	6	8	12	20	11	10	8	9	9	9	9	10	7	5	3	3	7	6	12	9	17
JUN	6	6	7	6	10	11	17	9	8	9	10	11	10	11	8	8	4	3	2	3	4	7	6	6
JUL	22	11	13	14	12	30	27	13	11	9	12	13	8	10	8	6	3	3	4	4	6	9	12	11
AUG	10	6	8	9	10	19	22	20	11	7	6	8	5	5	4	4	5	4	5	4	4	5	5	5
SEP	4	5	5	7	8	9	12	17	16	11	5	4	4	3	3	2	2	2	4	4	3	5	8	7
OCT	5	3	7	5	5	5	4	9	8	7	4	5	4	3	5	2	2	2	2	3	3	4	4	3
NOV	5	5	5	5	5	5	5	8	8	9	6	5	2	3	3	3	3	4	3	4	3	3	4	3
DEC	2	2	2	3	6	4	2	3	3	6	5	6	9	2	2	2	2	3	2	2	2	2	2	1
Number of intakes:			2	Length of the sampling period:						150	s	Unit:	0.01	µmol mol-1
month\time	0	1	2	3	4	5	6	7	8	9	10	11	12	13	14	15	16	17	18	19	20	21	22	23
JAN	2	2	2	6	6	2	5	4	4	6	5	4	5	2	2	2	2	3	2	2	2	3	2	2
FEB	1	1	1	1	1	1	2	1	3	2	3	2	2	2	2	1	1	1	1	1	2	1	1	1
MAR	2	1	2	2	2	2	2	3	3	3	2	3	2	2	2	1	1	2	1	1	2	1	1	2
APR	3	6	5	6	5	6	8	9	6	6	6	8	3	4	4	3	2	2	2	3	4	2	3	5
MAY	8	4	7	10	9	8	19	10	9	8	8	11	11	9	10	6	5	2	2	6	9	9	11	20
JUN	7	6	7	6	9	9	18	10	8	10	8	11	10	10	9	8	5	2	3	4	5	6	6	7
JUL	20	16	16	15	11	21	31	13	12	13	16	9	10	12	8	6	3	3	6	3	5	8	10	16
AUG	6	5	8	17	12	25	18	23	15	9	8	7	5	5	4	5	3	4	6	2	7	4	7	6
SEP	6	6	6	8	11	13	7	17	11	11	6	5	4	4	3	3	2	2	3	5	4	7	4	8
OCT	4	3	6	6	6	6	4	12	8	6	5	5	3	4	3	1	2	2	2	2	2	5	4	4
NOV	6	3	5	5	3	4	5	4	11	15	6	4	3	2	3	4	5	4	4	3	4	3	4	3
DEC	2	2	2	3	5	3	3	3	4	3	5	8	5	5	3	2	3	2	1	2	2	2	2	1
Number of intakes:			2	Length of the sampling period:						180	s	Unit:	0.01	µmol mol-1
month\time	0	1	2	3	4	5	6	7	8	9	10	11	12	13	14	15	16	17	18	19	20	21	22	23
JAN	4	1	4	4	8	2	5	4	3	4	6	3	3	2	2	2	2	2	2	2	2	1	2	2
FEB	1	1	1	1	1	1	2	2	3	4	2	2	1	2	2	1	1	1	2	1	2	1	1	1
MAR	2	1	1	3	2	2	1	4	4	3	3	2	2	2	2	1	1	1	2	1	2	2	2	2
APR	8	6	5	3	5	4	6	12	6	6	6	6	5	4	5	4	3	2	2	2	2	4	3	8
MAY	14	4	8	4	4	10	14	11	11	11	10	12	9	12	9	8	4	4	3	5	13	19	14	19
JUN	5	6	6	7	7	17	19	15	8	13	12	13	11	13	10	8	5	3	2	3	3	5	5	8
JUL	16	9	15	9	14	31	32	13	12	8	12	11	12	13	10	6	4	3	4	4	6	8	12	23
AUG	8	5	9	16	14	14	21	23	15	9	7	8	6	6	5	5	3	4	6	4	6	9	5	3
SEP	6	3	7	5	15	8	6	25	18	9	6	5	5	3	3	2	2	2	3	4	3	5	6	8
OCT	3	3	4	6	5	4	4	9	11	9	6	5	4	3	4	2	2	3	2	2	3	6	4	4
NOV	6	5	8	6	3	5	3	5	9	9	8	4	4	3	3	3	5	3	4	4	3	3	4	3
DEC	3	2	2	3	3	3	5	4	3	6	5	7	7	3	4	1	3	3	2	2	2	1	3	3
Number of intakes:			2	Length of the sampling period:						200	s	Unit:	0.01	µmol mol-1
month\time	0	1	2	3	4	5	6	7	8	9	10	11	12	13	14	15	16	17	18	19	20	21	22	23
JAN	4	2	2	5	4	1	4	4	3	4	5	4	3	3	3	2	2	3	3	2	2	2	2	2
FEB	1	1	1	1	1	2	2	2	5	3	2	2	2	2	2	1	1	1	2	2	2	1	1	2
MAR	1	1	2	3	2	1	2	3	3	3	3	3	2	2	2	2	1	1	2	2	2	1	2	1
APR	9	6	5	4	10	3	5	12	7	5	6	6	5	5	4	3	2	2	2	3	3	3	3	5
MAY	16	9	5	6	3	9	13	12	11	11	11	11	12	12	13	10	4	4	3	5	10	8	11	15
JUN	8	7	8	6	10	9	19	11	10	11	12	12	10	14	10	7	5	3	2	3	4	6	9	8
JUL	8	10	12	20	9	37	27	14	12	11	11	12	10	11	12	7	5	4	6	6	7	10	10	11
AUG	6	5	5	9	13	18	22	26	12	8	6	7	6	6	4	4	6	5	3	5	5	9	7	6
SEP	5	5	7	7	10	5	10	18	23	10	8	5	5	4	4	3	1	2	3	4	4	5	5	8
OCT	4	4	4	5	6	4	4	7	12	9	5	5	5	4	5	2	1	2	3	3	3	5	4	3
NOV	6	4	6	4	6	4	6	5	8	15	7	3	3	3	3	2	5	4	4	4	3	4	4	4
DEC	3	2	2	2	2	4	4	2	3	4	5	6	6	2	2	2	3	5	2	1	3	2	2	2
Number of intakes:			2	Length of the sampling period:						225	s	Unit:	0.01	µmol mol-1
month\time	0	1	2	3	4	5	6	7	8	9	10	11	12	13	14	15	16	17	18	19	20	21	22	23
JAN	4	4	3	3	7	3	7	4	3	8	7	4	5	3	2	2	2	2	2	2	1	1	2	3
FEB	1	1	1	1	1	2	2	2	3	6	2	2	3	2	1	1	1	1	2	1	2	1	1	1
MAR	2	2	1	4	2	2	2	4	4	3	3	2	2	2	2	2	1	2	2	2	2	2	1	2
APR	5	5	5	4	5	9	7	13	10	8	6	6	6	6	3	3	3	2	2	2	3	4	4	5
MAY	17	7	11	5	8	7	16	14	10	12	8	14	10	12	11	6	6	4	3	8	10	10	6	13
JUN	7	7	6	8	9	10	23	8	9	9	13	13	13	12	10	8	7	4	2	3	4	5	4	8
JUL	13	7	14	17	11	32	30	16	13	13	13	13	9	13	11	6	5	4	5	6	7	13	14	17
AUG	6	5	4	10	8	17	23	26	12	10	7	8	7	5	5	4	5	5	7	5	5	9	4	3
SEP	9	7	9	11	7	10	4	15	41	9	6	5	4	4	3	3	2	2	3	3	9	8	6	7
OCT	3	4	6	8	5	4	7	7	12	7	5	5	4	3	3	4	2	3	4	2	3	4	7	3
NOV	5	5	6	5	7	5	6	5	8	10	7	4	4	2	3	4	4	4	4	3	3	3	5	7
DEC	3	2	1	3	5	2	4	4	3	5	6	6	8	2	3	2	4	3	2	2	4	2	2	2
Number of intakes:			2	Length of the sampling period:						300	s	Unit:	0.01	µmol mol-1
month\time	0	1	2	3	4	5	6	7	8	9	10	11	12	13	14	15	16	17	18	19	20	21	22	23
JAN	3	4	3	5	4	2	6	5	3	5	7	5	6	2	4	3	3	3	2	2	2	2	2	3
FEB	1	1	1	1	1	2	2	2	3	6	3	2	2	2	1	1	1	1	2	1	2	1	1	1
MAR	2	1	2	2	3	2	2	3	4	2	4	3	2	2	2	2	2	1	2	2	2	2	1	2
APR	10	5	10	5	8	7	7	12	7	8	10	6	6	6	6	4	2	3	2	3	4	6	4	5
MAY	13	6	8	5	8	13	20	14	12	12	13	10	13	15	9	11	6	5	5	9	12	10	22	18
JUN	11	7	9	8	10	10	19	16	12	15	13	17	12	14	15	11	7	4	2	4	5	8	8	9
JUL	16	9	20	17	10	23	23	17	12	13	14	14	11	13	12	6	6	4	9	5	10	11	12	25
AUG	5	6	10	16	19	18	18	20	19	9	7	7	7	7	6	4	5	7	5	4	7	6	7	4
SEP	7	5	6	9	16	15	9	24	29	12	7	6	6	5	4	3	3	3	4	5	5	7	9	4
OCT	3	6	7	6	6	5	4	10	8	14	7	6	5	4	4	2	3	3	3	3	2	3	5	3
NOV	6	7	8	6	5	7	7	9	10	9	11	5	4	4	3	3	4	7	4	5	3	3	4	6
DEC	3	2	2	4	3	3	3	6	3	6	7	9	8	3	3	3	6	5	3	3	5	2	3	3
Number of intakes:			2	Length of the sampling period:						360	s	Unit:	0.01	µmol mol-1
month\time	0	1	2	3	4	5	6	7	8	9	10	11	12	13	14	15	16	17	18	19	20	21	22	23
JAN	4	3	4	5	8	2	6	4	3	6	9	4	4	4	3	3	3	3	3	2	2	2	2	3
FEB	1	1	1	1	1	2	3	3	6	6	3	2	2	3	2	2	2	1	1	2	2	1	1	1
MAR	2	2	2	2	3	2	3	4	4	3	4	3	3	2	2	2	1	2	2	2	3	2	1	3
APR	8	5	5	7	10	8	9	13	9	10	7	8	7	7	6	5	2	2	2	5	4	4	8	9
MAY	9	7	15	5	7	6	18	18	15	13	13	10	13	12	13	9	7	6	5	8	7	22	16	25
JUN	11	9	11	10	7	14	31	14	10	14	12	16	13	14	11	10	9	6	3	6	4	7	8	9
JUL	19	14	29	27	17	45	31	19	18	15	16	15	9	12	13	8	6	6	5	8	12	11	22	13
AUG	7	3	6	13	12	19	20	27	13	9	8	9	8	7	5	4	8	7	10	7	6	9	5	12
SEP	8	7	8	17	14	10	11	32	19	14	7	7	7	4	4	5	3	4	4	7	7	7	6	4
OCT	4	6	12	9	7	5	6	10	18	8	5	5	6	6	5	3	4	6	3	2	4	6	4	5
NOV	7	6	7	6	5	5	8	7	9	9	11	6	4	4	4	4	8	6	5	4	4	4	6	8
DEC	3	2	2	4	4	4	5	4	6	4	7	9	11	4	6	3	5	4	4	3	3	4	3	3
Number of intakes:			2	Length of the sampling period:						450	s	Unit:	0.01	µmol mol-1
month\time	0	1	2	3	4	5	6	7	8	9	10	11	12	13	14	15	16	17	18	19	20	21	22	23
JAN	4	4	4	7	7	5	7	5	5	7	6	6	4	4	3	4	3	2	2	2	2	2	2	3
FEB	1	1	1	2	2	3	4	2	7	5	3	4	3	3	3	2	2	2	1	2	3	2	2	2
MAR	2	2	2	2	3	2	3	5	4	5	6	4	3	2	3	2	2	2	2	3	2	3	3	3
APR	13	9	7	6	17	8	10	16	9	9	10	7	6	5	6	4	3	3	3	5	4	8	8	7
MAY	8	8	14	9	11	14	28	15	15	17	15	14	13	15	12	10	7	6	5	10	13	25	9	33
JUN	12	7	10	11	9	15	32	15	11	16	16	17	16	20	13	12	9	7	4	6	7	9	8	12
JUL	27	12	40	37	22	35	40	23	19	15	13	14	13	14	17	8	7	5	7	12	13	16	18	33
AUG	7	6	8	20	35	26	16	36	17	11	10	11	8	7	7	5	7	8	7	6	8	6	10	10
SEP	11	6	8	14	14	13	13	30	15	15	8	9	8	5	5	4	4	3	4	6	6	9	12	6
OCT	5	7	7	12	8	6	9	12	15	11	7	7	7	7	5	4	3	5	4	4	5	7	5	5
NOV	9	9	7	7	4	9	9	9	16	11	10	8	4	5	4	7	6	8	7	7	5	4	7	6
DEC	5	4	3	4	3	5	7	4	4	5	9	10	11	4	4	4	5	3	3	4	4	3	3	3
Number of intakes:			2	Length of the sampling period:						600	s	Unit:	0.01	µmol mol-1
month\time	0	1	2	3	4	5	6	7	8	9	10	11	12	13	14	15	16	17	18	19	20	21	22	23
JAN	5	6	3	7	8	4	3	11	7	9	11	6	5	5	5	5	4	4	3	3	3	4	4	5
FEB	1	2	2	2	2	5	3	3	5	6	3	3	3	4	4	3	2	3	3	4	3	2	2	2
MAR	3	2	3	3	4	5	4	5	5	6	5	4	4	4	4	3	2	3	3	3	5	3	4	3
APR	13	9	12	8	13	12	12	26	13	12	9	9	7	6	7	5	4	3	5	5	9	7	8	13
MAY	21	7	11	12	10	12	44	24	21	17	17	16	13	18	21	13	11	7	9	16	15	26	24	27
JUN	17	10	20	19	22	16	38	18	14	15	15	13	16	20	14	11	12	8	5	8	10	13	11	8
JUL	33	24	47	26	28	60	57	30	24	20	19	18	14	19	15	14	9	9	10	16	16	17	27	28
AUG	13	9	9	18	38	24	27	37	21	14	12	12	10	8	7	7	10	19	7	6	7	9	14	11
SEP	14	7	18	28	17	23	16	41	20	16	11	10	9	7	6	6	5	4	7	12	10	9	16	14
OCT	6	6	9	10	6	6	11	15	22	19	11	9	9	7	6	5	5	6	6	4	4	10	5	6
NOV	16	8	11	11	12	8	10	10	17	17	10	9	7	6	6	8	10	7	7	6	5	7	9	15
DEC	4	3	3	4	6	8	6	6	4	11	11	9	11	6	8	4	5	3	4	4	6	4	5	4
Number of intakes:			2	Length of the sampling period:						900	s	Unit:	0.01	µmol mol-1
month\time	0	1	2	3	4	5	6	7	8	9	10	11	12	13	14	15	16	17	18	19	20	21	22	23
JAN	7	6	5	14	20	7	17	10	7	14	14	9	8	9	7	10	12	7	5	4	4	4	5	6
FEB	3	3	4	3	4	4	5	9	10	9	5	6	6	6	5	5	5	4	5	6	6	4	4	4
MAR	5	4	4	5	4	5	7	8	9	8	7	6	6	6	4	6	4	4	5	5	6	5	4	8
APR	18	17	18	18	30	24	23	28	15	13	12	12	10	9	12	6	7	5	7	11	9	11	13	22
MAY	21	13	16	17	21	47	61	28	25	19	20	19	17	22	20	20	14	10	13	20	20	18	33	30
JUN	22	12	28	23	35	26	52	29	22	20	19	19	18	21	17	15	13	13	6	13	14	16	14	12
JUL	31	34	73	44	53	68	67	43	30	23	27	18	17	19	22	17	14	11	10	17	27	34	35	37
AUG	16	21	23	55	35	41	78	56	41	20	17	13	13	9	11	11	14	15	15	12	13	11	17	12
SEP	25	14	23	49	35	23	32	63	31	31	16	10	8	11	7	8	8	6	10	19	14	16	22	12
OCT	8	9	18	17	7	15	17	17	34	25	13	14	12	8	8	7	10	11	12	7	7	22	15	16
NOV	15	15	18	13	13	12	11	21	24	35	16	13	9	9	9	11	14	16	13	10	8	6	11	17
DEC	10	6	5	8	10	16	12	13	7	21	13	19	13	8	9	7	10	7	5	5	9	7	7	8
Number of intakes:			2	Length of the sampling period:						1800	s	Unit:	0.01	µmol mol-1
month\time	0	1	2	3	4	5	6	7	8	9	10	11	12	13	14	15	16	17	18	19	20	21	22	23
JAN	15	14	20	24	24	14	28	21	18	26	29	19	24	19	17	23	19	17	15	12	10	12	11	15
FEB	8	10	10	7	10	14	12	19	22	24	13	14	11	13	15	15	12	12	14	17	12	11	12	9
MAR	11	12	14	13	10	13	19	25	20	19	17	13	11	12	10	13	9	10	12	11	14	15	13	18
APR	49	49	33	32	43	65	70	60	37	34	27	18	15	16	17	12	12	16	19	21	22	21	36	40
MAY	59	40	29	51	48	76	177	93	74	54	35	29	27	36	27	28	29	22	30	38	44	49	39	70
JUN	39	27	63	59	80	78	123	85	39	34	35	22	30	37	25	25	33	27	17	30	39	37	26	24
JUL	82	86	110	98	106	155	154	118	69	38	35	28	23	23	32	25	24	23	31	49	50	55	56	69
AUG	34	34	45	159	73	111	188	149	97	54	36	26	26	19	19	23	30	37	33	25	27	32	33	41
SEP	62	58	53	92	84	51	82	114	89	54	43	30	18	20	16	15	19	18	20	33	34	34	49	36
OCT	15	24	32	33	26	27	42	50	87	57	32	26	27	16	24	16	22	22	21	19	26	36	33	21
NOV	36	39	40	34	31	29	32	32	40	78	43	28	21	21	23	27	28	32	29	25	26	18	27	28
DEC	21	16	13	18	24	26	26	25	18	22	34	40	37	17	18	16	26	24	13	13	15	15	18	18
Number of intakes:			3	Length of the sampling period:						100	s	Unit:	0.01	µmol mol-1
month\time	0	1	2	3	4	5	6	7	8	9	10	11	12	13	14	15	16	17	18	19	20	21	22	23
JAN	3	3	3	5	7	3	5	5	4	6	7	5	5	3	2	3	3	3	2	3	3	4	2	4
FEB	1	1	1	1	2	2	2	3	4	4	3	2	2	3	2	1	1	2	2	2	2	1	1	1
MAR	3	2	2	3	3	2	3	4	4	4	3	3	2	2	3	2	1	2	2	2	3	2	2	3
APR	7	7	7	7	11	8	16	12	8	7	9	9	7	6	6	3	3	3	3	4	4	4	6	8
MAY	10	4	7	10	13	7	31	13	13	10	15	14	12	11	14	9	7	4	4	8	13	19	21	22
JUN	10	8	10	8	10	14	36	14	11	14	14	16	13	13	12	11	7	3	3	5	6	9	7	9
JUL	27	14	15	19	13	35	33	20	15	15	17	13	16	14	13	9	6	5	7	6	8	13	15	17
AUG	7	9	9	21	12	19	27	26	19	12	9	10	7	7	6	5	5	6	7	3	8	10	10	8
SEP	10	6	11	10	17	16	8	22	15	12	7	5	5	5	5	4	2	3	4	5	6	8	8	9
OCT	5	5	8	6	7	8	7	14	12	8	7	6	5	5	5	2	2	4	4	3	3	6	6	5
NOV	7	7	6	7	7	6	6	6	12	15	7	7	4	4	3	4	5	6	6	5	5	4	5	4
DEC	4	3	3	3	4	4	3	4	4	4	5	9	7	5	3	3	2	4	3	2	3	3	2	3
Number of intakes:			3	Length of the sampling period:						120	s	Unit:	0.01	µmol mol-1
month\time	0	1	2	3	4	5	6	7	8	9	10	11	12	13	14	15	16	17	18	19	20	21	22	23
JAN	4	3	4	6	11	3	6	6	3	7	9	6	5	3	3	3	3	3	3	2	2	3	3	3
FEB	1	1	1	1	1	2	2	3	5	6	2	3	3	3	2	2	2	1	2	2	2	2	2	2
MAR	2	2	2	2	3	3	2	6	5	4	4	3	2	2	2	2	1	2	2	2	3	2	2	3
APR	10	9	7	6	10	8	14	15	10	9	8	9	6	6	6	4	3	3	2	5	4	4	5	8
MAY	14	7	12	10	8	21	23	17	15	14	13	16	13	13	14	11	6	4	3	6	11	17	12	19
JUN	10	8	11	9	12	16	25	16	10	14	14	15	14	15	13	10	7	4	4	4	5	8	8	10
JUL	18	18	24	20	21	36	49	21	16	10	17	16	15	15	14	9	6	5	5	6	9	17	18	24
AUG	6	10	9	17	14	15	33	31	17	11	11	10	7	7	7	6	6	6	8	7	7	16	6	6
SEP	10	7	11	11	19	10	9	28	18	13	7	7	5	4	5	3	2	3	4	4	6	8	9	8
OCT	6	5	6	7	6	6	7	14	12	9	6	7	6	4	4	3	2	5	4	3	5	7	6	4
NOV	8	7	7	8	6	7	5	7	11	18	8	6	5	4	4	4	7	5	4	5	5	4	4	5
DEC	3	3	3	3	3	4	7	3	5	7	8	7	10	4	4	2	4	4	2	3	3	2	3	3
Number of intakes:			3	Length of the sampling period:						150	s	Unit:	0.01	µmol mol-1
month\time	0	1	2	3	4	5	6	7	8	9	10	11	12	13	14	15	16	17	18	19	20	21	22	23
JAN	5	4	5	5	6	3	8	6	4	8	8	5	7	3	3	3	3	3	3	2	2	2	2	3
FEB	1	1	1	1	2	3	2	3	6	6	2	3	2	2	2	2	2	2	2	2	2	1	2	2
MAR	2	2	2	3	2	3	3	4	6	4	4	3	3	3	2	2	1	2	2	2	2	3	2	3
APR	6	6	6	6	10	9	13	18	11	11	9	9	8	6	6	4	3	2	2	3	4	5	4	8
MAY	15	7	11	10	8	13	25	18	15	14	14	16	13	17	17	10	8	5	4	12	16	12	15	26
JUN	10	10	9	10	13	14	23	15	12	13	16	18	16	14	16	12	8	5	3	4	4	9	9	10
JUL	24	12	19	23	19	46	43	19	15	15	16	17	16	14	15	9	6	4	7	7	9	13	16	20
AUG	8	9	8	15	13	25	26	27	18	15	9	9	7	8	6	6	7	6	10	6	5	11	8	8
SEP	7	6	10	11	12	14	9	21	25	13	8	8	5	5	4	4	2	3	5	5	8	9	8	6
OCT	5	5	9	9	8	6	9	11	13	12	6	7	5	5	5	4	3	4	4	3	4	5	7	6
NOV	5	6	7	7	7	7	9	7	10	15	13	6	5	4	4	5	5	6	5	5	4	3	6	6
DEC	3	3	2	4	6	5	6	4	5	8	7	10	9	4	3	3	5	5	3	3	5	3	3	2
Number of intakes:			3	Length of the sampling period:						200	s	Unit:	0.01	µmol mol-1
month\time	0	1	2	3	4	5	6	7	8	9	10	11	12	13	14	15	16	17	18	19	20	21	22	23
JAN	4	4	4	8	6	3	7	7	4	6	9	6	7	4	3	4	4	4	3	2	2	3	3	4
FEB	1	1	1	1	2	3	2	3	6	8	4	3	4	3	3	2	2	2	2	2	2	2	1	2
MAR	2	2	3	5	3	2	3	5	4	5	5	3	3	3	4	2	2	2	2	2	3	2	2	2
APR	9	7	12	8	12	8	12	16	9	11	10	8	8	7	6	5	3	3	4	4	5	6	5	9
MAY	13	10	12	8	11	15	28	18	17	13	16	14	17	15	15	13	6	5	4	11	18	12	31	16
JUN	9	9	10	11	9	16	41	19	12	18	16	19	16	16	17	12	10	5	4	4	6	7	10	10
JUL	14	13	24	17	14	37	39	22	17	19	16	17	14	16	15	9	7	5	10	9	13	15	26	28
AUG	6	6	13	15	14	22	26	35	25	12	10	10	9	9	8	6	8	9	6	6	9	9	7	7
SEP	11	9	8	11	14	15	11	26	29	20	9	8	8	7	4	4	3	4	6	7	8	8	8	6
OCT	5	7	9	9	8	6	6	15	17	14	9	9	7	6	5	3	3	4	5	4	4	6	9	5
NOV	8	8	9	7	7	8	10	10	11	15	12	7	5	5	4	4	9	7	7	6	5	4	6	8
DEC	4	2	3	5	6	4	5	6	5	6	8	11	11	7	5	2	7	6	3	4	4	2	3	3
Number of intakes:			3	Length of the sampling period:						240	s	Unit:	0.01	µmol mol-1
month\time	0	1	2	3	4	5	6	7	8	9	10	11	12	13	14	15	16	17	18	19	20	21	22	23
JAN	4	3	6	6	7	3	7	7	4	10	11	7	5	4	4	3	3	3	3	3	2	3	3	3
FEB	1	2	1	2	2	3	4	4	6	8	4	4	3	4	3	3	2	2	2	2	2	1	2	2
MAR	3	3	2	3	3	3	4	5	6	5	5	5	3	3	4	3	2	2	3	2	3	2	3	3
APR	9	8	8	7	10	8	12	18	13	13	10	10	9	9	6	5	3	3	3	5	5	6	8	9
MAY	21	6	18	8	9	13	23	20	18	16	21	16	15	16	19	13	8	7	5	10	13	23	19	24
JUN	12	9	11	14	10	17	28	20	13	19	17	18	20	20	15	14	11	6	4	8	6	7	11	12
JUL	23	20	35	38	31	57	66	23	20	17	18	21	16	16	18	11	8	6	10	10	15	14	29	23
AUG	9	6	10	21	19	25	37	41	22	13	11	10	10	10	7	7	9	12	12	7	14	9	11	11
SEP	11	11	12	17	13	29	10	35	24	16	13	8	8	6	5	6	3	4	5	9	8	9	12	7
OCT	6	5	12	9	9	8	9	12	20	12	8	7	8	7	5	3	4	6	4	4	6	6	5	6
NOV	10	6	9	10	7	8	9	11	12	14	10	8	6	6	6	5	8	8	7	6	6	5	7	9
DEC	3	3	3	6	4	6	8	6	6	5	8	15	14	6	7	3	5	7	4	4	4	3	4	4
Number of intakes:			3	Length of the sampling period:						300	s	Unit:	0.01	µmol mol-1
month\time	0	1	2	3	4	5	6	7	8	9	10	11	12	13	14	15	16	17	18	19	20	21	22	23
JAN	5	4	5	9	9	4	9	7	6	10	11	7	8	5	5	5	4	4	3	3	4	3	3	4
FEB	1	2	1	2	2	3	4	3	8	8	3	5	3	4	3	3	2	3	2	2	3	2	2	2
MAR	3	3	3	3	4	3	5	6	6	6	6	5	4	3	4	3	2	3	3	3	4	3	3	3
APR	17	11	7	6	20	11	16	21	13	12	13	10	9	8	7	5	4	4	5	6	6	8	8	9
MAY	14	8	16	9	12	19	30	23	19	23	20	19	20	19	18	13	8	8	9	9	21	24	24	37
JUN	14	12	15	14	14	19	34	19	14	20	18	20	17	23	19	16	12	9	5	10	6	11	10	12
JUL	28	17	43	40	32	50	58	28	25	22	24	24	14	21	19	11	10	7	9	13	16	17	20	38
AUG	10	8	16	27	33	36	36	49	22	14	13	14	10	11	9	8	10	12	9	8	10	9	12	11
SEP	12	9	9	21	19	18	16	43	29	16	15	12	8	6	7	6	5	4	7	8	12	10	13	13
OCT	4	7	8	10	10	8	9	13	16	13	12	8	8	8	7	4	5	5	5	4	5	10	9	5
NOV	9	11	12	9	9	11	12	10	19	16	14	9	6	6	5	8	8	9	7	9	7	7	7	8
DEC	6	4	3	4	7	7	7	5	5	6	10	15	13	4	7	4	7	4	4	4	6	3	4	4
Number of intakes:			3	Length of the sampling period:						400	s	Unit:	0.01	µmol mol-1
month\time	0	1	2	3	4	5	6	7	8	9	10	11	12	13	14	15	16	17	18	19	20	21	22	23
JAN	6	7	4	12	18	6	9	10	8	9	15	10	7	5	5	6	5	5	4	4	3	5	4	6
FEB	2	2	2	2	3	5	5	4	8	7	5	5	4	5	4	3	3	3	4	3	3	2	3	2
MAR	3	3	3	5	4	5	5	7	7	7	6	5	5	4	5	3	3	3	4	4	5	4	5	4
APR	16	19	18	10	24	12	17	28	15	13	12	11	9	9	10	6	5	4	6	8	10	10	12	13
MAY	23	9	13	12	12	15	49	28	23	20	21	19	17	23	25	17	13	9	11	20	16	33	32	27
JUN	16	15	20	18	24	23	48	25	20	22	20	20	24	25	21	16	13	11	6	10	10	14	13	14
JUL	42	29	57	32	33	67	76	37	25	27	23	18	19	20	20	16	12	8	12	20	19	21	31	37
AUG	16	10	10	30	35	31	42	37	31	17	15	14	12	11	10	10	12	18	11	8	8	12	15	14
SEP	14	9	20	28	29	30	23	37	31	27	15	12	11	9	9	7	5	5	9	12	13	12	17	12
OCT	8	6	19	15	9	10	13	18	25	26	14	12	11	9	9	5	6	8	9	5	6	10	9	9
NOV	19	11	11	11	14	11	12	11	18	18	15	10	9	8	7	9	11	11	9	11	7	7	11	14
DEC	6	5	3	4	9	9	10	8	4	11	12	12	22	6	7	7	9	5	5	5	6	5	6	5
Number of intakes:			3	Length of the sampling period:						600	s	Unit:	0.01	µmol mol-1
month\time	0	1	2	3	4	5	6	7	8	9	10	11	12	13	14	15	16	17	18	19	20	21	22	23
JAN	9	7	9	17	20	8	21	16	10	19	20	14	11	10	8	10	11	7	6	6	4	5	6	8
FEB	3	4	5	4	4	6	7	7	12	9	6	6	6	8	7	5	6	6	5	6	6	5	4	4
MAR	7	5	5	6	6	6	8	8	10	9	9	7	6	6	6	6	4	5	6	5	8	5	6	9
APR	23	22	21	22	28	27	24	33	20	15	14	15	12	11	13	7	6	6	9	11	12	11	17	24
MAY	37	15	16	19	20	38	71	31	26	23	24	22	23	24	24	24	19	13	15	25	35	36	28	32
JUN	23	23	30	26	37	29	61	41	25	25	23	22	25	28	23	21	17	15	8	14	17	18	26	21
JUL	39	42	84	43	50	77	110	49	43	27	29	28	20	22	23	19	17	14	19	23	39	37	48	65
AUG	17	25	25	61	36	46	72	59	41	23	21	14	15	13	14	13	17	20	16	13	18	16	23	18
SEP	32	24	27	49	41	31	33	76	54	47	22	14	13	12	11	9	8	7	12	21	15	18	25	17
OCT	11	12	23	22	8	14	15	30	39	39	17	17	15	10	11	7	10	12	12	8	9	23	17	17
NOV	20	17	20	18	16	20	20	19	26	37	19	13	11	12	10	12	16	18	14	12	10	9	13	17
DEC	13	8	6	9	10	15	15	12	8	19	16	24	19	10	12	9	11	10	8	7	12	9	8	9
Number of intakes:			3	Length of the sampling period:						1200	s	Unit:	0.01	µmol mol-1
month\time	0	1	2	3	4	5	6	7	8	9	10	11	12	13	14	15	16	17	18	19	20	21	22	23
JAN	16	15	21	34	24	18	30	25	20	32	30	25	28	20	20	24	23	16	15	12	10	15	12	16
FEB	9	10	12	9	11	16	13	21	24	25	15	14	13	15	15	15	15	12	14	18	13	13	13	11
MAR	12	13	15	14	13	15	18	28	24	23	19	13	12	13	13	14	10	11	13	13	15	15	13	16
APR	51	45	38	38	68	62	78	70	42	34	29	22	18	18	21	14	14	17	21	26	24	24	37	55
MAY	56	41	24	52	53	78	199	98	80	55	40	34	33	38	32	41	30	27	32	51	40	47	44	75
JUN	43	28	55	58	93	71	118	86	42	42	40	29	33	42	32	30	35	27	17	31	38	44	35	34
JUL	92	111	134	109	99	154	152	138	73	46	37	35	26	30	38	29	27	26	36	48	65	76	73	91
AUG	44	41	41	136	115	103	178	164	91	58	39	29	28	22	21	25	33	54	35	27	32	39	37	36
SEP	68	52	62	93	78	92	85	128	94	68	48	32	23	22	17	16	23	20	26	36	34	40	50	39
OCT	18	24	38	39	29	29	45	54	89	60	35	27	27	18	22	16	24	27	24	17	24	36	39	25
NOV	46	39	42	35	40	32	30	39	47	81	47	29	20	25	24	27	35	34	29	28	28	21	29	29
DEC	28	17	16	22	23	26	27	27	17	25	37	39	44	19	20	18	27	26	16	14	19	19	20	23
Number of intakes:			4	Length of the sampling period:						100	s	Unit:	0.01	µmol mol-1
month\time	0	1	2	3	4	5	6	7	8	9	10	11	12	13	14	15	16	17	18	19	20	21	22	23
JAN	5	3	3	8	9	4	6	6	5	8	11	6	5	4	3	3	3	5	4	3	3	3	3	4
FEB	2	2	1	2	1	3	3	4	8	5	3	3	3	3	2	2	2	2	2	2	3	2	2	2
MAR	3	3	3	4	3	4	5	5	4	5	5	4	3	3	3	2	2	2	3	3	3	3	2	3
APR	13	10	9	8	11	8	18	16	10	9	11	10	8	7	7	5	3	3	3	6	5	6	6	8
MAY	24	12	12	16	8	19	26	15	16	15	17	17	17	20	17	12	8	6	4	8	14	18	16	13
JUN	12	9	11	10	15	20	28	20	13	17	19	17	17	21	14	11	8	5	3	5	7	11	13	11
JUL	28	23	28	29	16	54	49	22	18	17	19	20	21	19	17	10	8	5	7	8	10	19	24	24
AUG	11	9	13	16	15	18	31	33	21	13	10	12	9	9	8	7	9	8	9	6	9	11	9	8
SEP	8	11	10	12	14	14	15	33	28	13	9	7	7	6	5	4	3	4	5	8	9	8	6	13
OCT	6	6	8	8	9	7	9	14	16	12	7	7	8	6	7	3	3	4	5	5	5	6	7	6
NOV	8	9	10	7	8	9	8	9	15	19	12	7	5	5	5	5	8	7	5	7	5	6	7	6
DEC	4	3	3	4	6	5	5	7	4	7	7	11	10	4	5	3	5	5	3	3	5	4	3	4
Number of intakes:			4	Length of the sampling period:						150	s	Unit:	0.01	µmol mol-1
month\time	0	1	2	3	4	5	6	7	8	9	10	11	12	13	14	15	16	17	18	19	20	21	22	23
JAN	5	5	3	8	8	4	9	8	6	9	10	8	7	4	4	4	4	5	4	3	3	4	3	5
FEB	2	2	1	2	2	3	3	4	8	8	4	3	3	3	3	2	2	2	2	2	3	2	2	2
MAR	3	3	3	5	4	3	3	6	6	5	5	4	3	3	3	2	2	3	2	2	3	2	2	3
APR	12	8	12	8	16	11	16	16	11	12	11	11	8	9	8	6	4	4	3	5	6	7	6	11
MAY	15	8	14	14	14	18	29	21	19	15	19	18	18	19	15	14	9	5	6	11	17	16	33	25
JUN	14	9	14	12	15	18	40	23	16	21	20	22	19	19	19	15	11	6	4	7	7	11	12	11
JUL	27	20	25	26	15	44	44	26	21	21	22	19	18	19	17	11	8	6	10	8	16	14	28	31
AUG	9	11	13	28	22	33	30	41	27	15	11	11	10	10	9	7	8	9	9	7	10	11	10	7
SEP	9	9	10	13	18	22	13	35	32	23	11	9	8	7	6	5	3	4	6	9	8	11	10	10
OCT	7	8	10	11	9	8	7	19	16	15	10	10	7	7	6	3	4	6	6	4	6	6	10	5
NOV	11	9	10	8	7	8	10	10	15	19	14	7	6	5	5	6	9	7	9	6	5	5	7	7
DEC	4	3	3	5	7	6	5	7	6	7	10	14	13	7	6	4	7	5	3	5	6	3	3	4
Number of intakes:			4	Length of the sampling period:						180	s	Unit:	0.01	µmol mol-1
month\time	0	1	2	3	4	5	6	7	8	9	10	11	12	13	14	15	16	17	18	19	20	21	22	23
JAN	6	4	5	8	13	3	8	7	6	9	11	6	6	5	4	4	4	4	3	3	3	3	3	4
FEB	1	2	1	2	2	3	4	4	8	7	4	4	4	4	3	2	2	2	2	3	3	2	2	2
MAR	3	3	3	3	4	4	3	6	6	6	7	5	4	3	4	3	2	2	3	2	4	3	3	3
APR	13	10	9	10	12	9	13	21	13	14	12	11	11	9	8	7	4	4	4	6	5	8	10	11
MAY	19	8	18	10	9	17	32	23	23	18	21	19	19	20	19	16	10	8	7	11	17	28	25	31
JUN	11	10	16	14	13	23	34	25	15	22	21	23	21	22	17	15	12	7	4	8	7	9	12	13
JUL	25	20	35	31	28	61	63	27	23	20	23	24	20	20	19	12	9	7	8	11	15	16	29	33
AUG	13	11	13	24	22	28	36	44	24	16	13	13	12	11	9	8	8	11	11	8	10	13	12	14
SEP	12	8	14	17	22	32	15	38	28	19	14	10	9	6	6	6	4	5	6	10	10	10	13	10
OCT	6	8	15	12	11	7	8	13	22	16	10	9	8	7	7	5	4	7	5	4	6	8	6	7
NOV	11	10	12	10	9	8	11	12	16	13	13	10	6	6	6	6	9	9	7	7	7	7	9	9
DEC	5	3	4	6	6	7	8	7	8	7	9	15	16	5	7	3	7	7	4	4	4	4	5	5
Number of intakes:			4	Length of the sampling period:						225	s	Unit:	0.01	µmol mol-1
month\time	0	1	2	3	4	5	6	7	8	9	10	11	12	13	14	15	16	17	18	19	20	21	22	23
JAN	6	6	6	9	11	5	11	8	7	13	11	8	9	5	4	5	5	4	4	4	3	3	4	5
FEB	2	2	2	2	3	4	5	4	8	8	4	5	4	4	3	3	3	3	3	3	3	2	2	2
MAR	3	4	4	4	4	3	5	7	6	6	7	6	4	4	4	3	2	3	4	4	4	4	3	4
APR	17	10	8	8	24	12	17	25	16	14	12	11	12	9	8	6	5	4	5	6	6	9	9	12
MAY	20	12	17	11	14	17	43	24	20	22	24	23	22	23	21	15	10	7	10	13	28	39	17	34
JUN	17	13	15	17	15	21	39	23	17	23	23	23	21	25	21	19	13	10	6	10	8	12	10	15
JUL	31	17	41	37	31	53	61	31	25	26	26	25	18	22	24	12	11	7	9	15	18	22	24	37
AUG	9	11	16	27	38	38	38	49	28	18	16	16	11	11	10	9	9	12	11	8	11	12	14	12
SEP	16	11	12	24	22	20	13	46	41	19	16	11	10	8	7	6	5	5	7	9	12	14	12	12
OCT	6	8	12	14	11	9	11	18	22	15	12	10	10	9	8	5	5	6	6	5	6	11	9	7
NOV	12	12	14	9	11	12	14	11	21	16	13	10	8	7	6	8	9	10	8	11	7	7	9	9
DEC	6	5	4	5	7	7	8	6	6	9	12	17	16	6	8	5	7	4	4	4	6	5	5	4
Number of intakes:			4	Length of the sampling period:						300	s	Unit:	0.01	µmol mol-1
month\time	0	1	2	3	4	5	6	7	8	9	10	11	12	13	14	15	16	17	18	19	20	21	22	23
JAN	6	8	4	14	19	7	11	12	8	13	16	11	10	6	7	6	5	5	4	5	4	5	5	6
FEB	2	3	2	2	3	6	5	4	9	9	5	5	5	6	4	3	3	3	4	4	4	3	3	3
MAR	4	3	4	4	6	6	6	7	8	8	7	7	5	5	5	4	3	4	4	4	6	4	5	4
APR	18	20	21	10	22	15	17	30	18	16	14	14	11	10	10	7	5	5	6	9	12	12	13	16
MAY	28	10	18	12	14	22	50	30	24	23	24	21	21	25	25	20	14	11	10	18	21	30	28	30
JUN	19	16	23	22	26	26	45	29	23	26	25	27	25	29	23	19	16	11	6	11	10	15	13	16
JUL	41	30	62	35	35	66	74	42	29	29	28	24	22	24	24	16	13	11	13	22	23	24	38	37
AUG	15	13	13	36	43	36	50	45	36	19	16	16	14	12	11	11	12	19	13	10	10	12	18	17
SEP	19	10	18	30	37	30	25	47	39	25	16	14	13	10	10	7	6	6	9	12	13	13	20	16
OCT	9	10	24	17	10	11	13	20	25	22	15	13	12	9	10	5	6	8	10	6	7	11	9	9
NOV	20	13	15	13	16	13	14	14	21	23	18	12	9	8	8	10	12	13	9	13	7	9	11	18
DEC	6	5	4	6	10	10	9	10	6	14	16	19	26	6	8	7	10	7	5	5	7	4	6	5
Number of intakes:			4	Length of the sampling period:						450	s	Unit:	0.01	µmol mol-1
month\time	0	1	2	3	4	5	6	7	8	9	10	11	12	13	14	15	16	17	18	19	20	21	22	23
JAN	10	8	8	19	20	9	21	15	12	20	21	14	12	11	8	11	12	8	7	7	5	5	7	9
FEB	3	4	4	4	5	6	8	8	15	12	7	7	7	8	7	6	5	6	5	6	7	5	5	4
MAR	7	6	5	6	6	7	8	10	11	10	10	8	7	7	6	7	5	5	7	6	8	7	6	9
APR	27	24	22	24	31	26	24	36	19	16	17	17	12	13	15	9	7	7	9	13	13	14	20	28
MAY	33	18	20	20	26	46	80	37	29	27	29	24	27	28	26	26	21	13	17	25	31	36	35	43
JUN	24	23	32	30	36	31	69	44	27	28	29	27	29	33	25	22	19	15	9	17	16	19	29	23
JUL	48	44	88	55	58	81	113	52	43	31	32	28	26	24	30	20	18	15	19	23	39	36	52	72
AUG	17	26	24	61	51	70	79	66	46	24	22	18	17	14	15	15	19	21	18	14	17	21	25	18
SEP	32	25	26	53	49	37	39	74	53	45	21	15	15	13	12	10	9	8	12	22	20	19	28	15
OCT	11	13	24	23	12	18	16	32	40	40	19	18	15	11	11	8	11	13	14	9	10	24	17	18
NOV	22	20	21	21	18	22	21	25	30	36	22	15	12	13	10	14	18	20	16	15	11	8	15	19
DEC	13	9	7	11	11	17	14	13	10	22	18	24	21	12	11	10	12	9	9	8	11	9	9	9
Number of intakes:			4	Length of the sampling period:						900	s	Unit:	0.01	µmol mol-1
month\time	0	1	2	3	4	5	6	7	8	9	10	11	12	13	14	15	16	17	18	19	20	21	22	23
JAN	18	16	22	35	32	17	28	27	23	36	31	26	25	22	20	27	24	17	15	11	10	16	13	16
FEB	9	10	11	9	11	17	13	25	24	27	15	16	13	16	15	15	15	12	15	18	13	14	13	11
MAR	12	13	15	15	13	16	19	29	24	23	19	15	14	14	13	15	10	11	13	14	17	17	15	18
APR	56	48	40	38	85	64	79	74	43	35	29	23	20	20	21	15	15	17	20	28	25	25	40	54
MAY	57	40	33	51	53	77	196	98	83	58	44	38	35	42	36	43	31	26	34	51	45	59	45	71
JUN	45	27	65	56	90	78	132	87	44	45	42	32	38	42	34	31	37	29	18	31	40	44	33	35
JUL	106	110	130	108	120	171	179	138	76	49	45	37	31	33	43	35	30	29	34	51	63	74	68	98
AUG	45	42	56	152	125	118	189	165	101	59	38	29	30	23	22	28	35	50	38	27	31	41	42	43
SEP	76	57	62	92	100	95	88	136	93	70	48	35	23	23	17	17	24	20	27	39	38	39	56	37
OCT	20	25	39	41	29	30	46	51	94	67	36	30	28	19	24	17	24	29	24	20	25	42	41	27
NOV	48	43	45	35	42	34	33	40	48	85	47	32	22	25	25	29	35	35	31	27	27	23	30	33
DEC	27	17	16	23	24	33	27	27	19	30	39	41	47	20	20	19	27	25	16	16	21	18	20	22
Number of intakes:			5	Length of the sampling period:						120	s	Unit:	0.01	µmol mol-1
month\time	0	1	2	3	4	5	6	7	8	9	10	11	12	13	14	15	16	17	18	19	20	21	22	23
JAN	6	5	5	9	8	4	9	9	6	10	12	9	8	5	4	4	4	5	5	4	4	4	3	5
FEB	2	2	1	2	2	3	3	4	9	9	4	4	4	4	3	2	2	2	3	2	3	2	2	2
MAR	3	3	3	5	4	4	3	8	6	6	6	5	4	3	4	3	3	3	3	3	4	3	2	3
APR	13	12	13	8	17	11	17	19	12	14	14	11	10	9	9	7	4	4	5	6	6	7	6	12
MAY	16	13	13	12	14	20	36	23	22	18	21	20	20	21	19	15	11	7	7	14	16	25	31	21
JUN	15	12	16	12	16	21	40	22	18	24	21	24	22	24	22	16	12	6	4	7	8	12	14	13
JUL	34	25	30	22	21	50	55	28	22	24	24	22	19	21	20	13	9	7	11	10	14	18	35	33
AUG	12	13	12	21	25	29	36	44	29	17	12	12	12	10	9	9	10	11	10	8	9	16	10	10
SEP	13	13	13	14	17	22	14	36	33	24	12	10	9	8	7	6	4	5	6	10	11	11	12	9
OCT	8	9	12	12	8	10	8	19	18	17	12	10	8	7	7	4	4	5	7	4	6	8	11	7
NOV	12	10	12	10	9	9	11	11	16	22	14	8	6	5	6	6	10	9	8	9	7	5	7	8
DEC	5	3	3	6	8	6	6	7	6	8	12	15	14	6	6	4	8	7	3	5	6	4	4	3
Number of intakes:			5	Length of the sampling period:						180	s	Unit:	0.01	µmol mol-1
month\time	0	1	2	3	4	5	6	7	8	9	10	11	12	13	14	15	16	17	18	19	20	21	22	23
JAN	7	5	6	11	11	6	11	9	8	11	13	8	8	6	5	5	5	4	5	4	4	4	4	4
FEB	2	2	2	3	3	5	5	4	10	9	4	5	4	4	4	3	3	4	3	3	3	3	3	3
MAR	3	3	3	5	5	4	5	8	8	7	8	7	4	4	5	4	2	3	4	4	4	4	4	5
APR	19	14	11	8	25	11	19	27	16	16	15	12	12	10	9	7	5	5	6	8	7	10	10	13
MAY	17	12	19	16	14	19	45	27	23	24	26	24	24	26	24	17	12	9	10	15	27	36	24	41
JUN	21	14	17	17	16	26	48	27	18	24	25	25	23	26	23	20	14	10	6	11	8	13	13	17
JUL	37	21	47	43	37	70	67	34	30	26	26	27	21	26	24	15	12	7	10	15	19	21	28	43
AUG	11	16	20	26	38	40	45	48	29	18	17	16	12	12	12	10	11	14	13	10	12	14	15	14
SEP	14	11	15	20	26	25	15	44	39	22	15	14	10	9	8	7	5	5	8	10	13	15	13	14
OCT	8	9	13	16	12	11	12	21	23	17	13	11	10	10	9	5	5	7	7	6	6	11	10	8
NOV	13	13	16	11	11	13	16	13	21	22	16	13	8	7	7	9	10	11	9	12	9	7	9	10
DEC	6	5	4	6	7	8	8	6	5	10	12	16	17	6	9	6	9	6	4	5	6	5	5	4
Number of intakes:			5	Length of the sampling period:						240	s	Unit:	0.01	µmol mol-1
month\time	0	1	2	3	4	5	6	7	8	9	10	11	12	13	14	15	16	17	18	19	20	21	22	23
JAN	7	8	5	13	19	7	9	12	9	13	18	11	9	7	6	7	5	6	4	4	4	6	5	6
FEB	2	3	2	3	3	6	5	5	10	9	6	6	5	7	5	4	4	4	4	4	4	3	3	3
MAR	4	4	4	5	5	6	6	9	8	8	8	7	5	5	5	4	4	4	5	4	6	4	5	5
APR	22	18	22	12	27	15	19	34	19	18	17	15	13	12	12	8	6	5	7	10	14	13	14	14
MAY	29	14	23	15	15	19	55	31	27	24	26	25	22	29	28	20	15	11	11	20	22	37	38	38
JUN	22	16	22	23	30	24	49	31	24	29	27	28	28	31	25	21	17	11	6	11	12	16	16	17
JUL	49	31	63	43	38	79	107	45	32	30	30	25	28	26	27	19	13	10	14	22	24	24	46	46
AUG	15	13	12	38	44	40	53	53	38	20	17	18	15	13	12	11	14	20	17	12	11	15	18	18
SEP	21	13	22	31	35	31	24	47	43	37	17	15	14	11	10	8	6	6	9	14	17	13	19	18
OCT	12	11	25	17	11	13	15	24	30	27	17	14	14	10	10	6	7	10	10	7	8	11	11	9
NOV	21	13	14	13	17	13	14	15	19	26	18	12	10	9	9	10	15	12	10	15	8	9	12	17
DEC	6	5	4	7	11	12	10	10	7	13	16	20	27	8	10	8	9	7	6	6	8	5	6	6
Number of intakes:			5	Length of the sampling period:						360	s	Unit:	0.01	µmol mol-1
month\time	0	1	2	3	4	5	6	7	8	9	10	11	12	13	14	15	16	17	18	19	20	21	22	23
JAN	10	8	9	22	21	8	23	18	12	21	24	15	14	12	8	11	13	8	7	7	5	6	7	8
FEB	3	4	4	4	5	6	7	9	15	13	7	8	7	9	7	6	6	6	6	7	7	5	5	4
MAR	7	5	6	8	7	7	8	11	11	10	10	9	7	7	7	7	5	5	7	7	8	7	6	10
APR	26	27	24	24	39	27	27	42	22	17	19	18	15	14	15	10	8	8	10	12	15	14	20	30
MAY	36	19	20	18	23	45	79	38	32	28	36	28	29	33	31	30	20	14	17	28	35	47	41	42
JUN	29	22	32	31	44	32	76	45	32	29	32	33	32	36	29	27	21	16	9	19	16	20	28	26
JUL	49	44	85	59	58	94	117	55	45	35	36	32	28	29	30	22	19	16	19	24	38	39	57	69
AUG	19	28	26	78	46	51	85	67	48	26	24	20	18	17	17	16	22	21	20	16	19	23	29	19
SEP	33	22	29	55	52	40	37	76	56	47	22	17	16	14	12	11	10	8	12	22	22	20	28	15
OCT	12	15	25	22	13	18	17	31	41	38	19	18	16	12	12	8	12	13	14	9	11	25	20	19
NOV	22	20	23	21	21	24	22	25	31	37	24	17	12	13	11	15	18	21	16	15	11	9	14	20
DEC	13	9	7	10	12	17	16	13	9	21	21	25	24	12	14	11	11	10	9	8	13	10	9	10
Number of intakes:			5	Length of the sampling period:						720	s	Unit:	0.01	µmol mol-1
month\time	0	1	2	3	4	5	6	7	8	9	10	11	12	13	14	15	16	17	18	19	20	21	22	23
JAN	18	17	23	35	32	18	32	30	25	37	37	29	27	22	21	27	24	17	16	12	10	16	13	18
FEB	9	10	12	9	11	17	15	24	25	26	16	16	14	17	16	16	15	13	15	19	13	13	13	11
MAR	13	14	15	15	14	16	20	28	24	24	20	15	14	14	13	15	10	11	14	14	17	17	15	19
APR	58	49	45	41	88	64	78	81	47	36	31	24	22	21	22	16	16	19	22	28	26	26	41	56
MAY	58	40	29	54	54	75	200	102	82	60	48	39	37	43	40	44	33	28	34	53	48	61	55	70
JUN	48	29	65	61	92	78	136	92	45	47	46	34	39	49	39	35	38	29	18	32	41	47	37	40
JUL	107	109	142	111	118	163	178	138	83	52	45	40	33	35	42	35	32	30	37	51	69	77	80	110
AUG	47	42	52	160	122	118	197	166	102	60	41	33	30	24	24	28	37	54	41	28	32	42	45	47
SEP	79	56	63	97	104	99	90	137	101	73	51	38	25	23	20	18	24	20	28	41	37	39	55	43
OCT	21	24	42	42	32	31	47	58	97	69	37	31	29	19	25	17	25	30	26	20	26	43	42	27
NOV	49	44	46	37	44	38	35	42	53	85	52	32	23	27	25	28	37	39	32	30	28	23	31	34
DEC	28	17	17	22	24	32	30	26	19	26	40	40	50	21	23	19	28	26	17	16	22	20	21	22

## Sheet: FigS6
LINEAR INTERPOLATION - 90-PERCENTILE OF ABSOLUTE DEVIATIONS
Number of intakes:			2	Length of the sampling period:						100	s	Unit:	0.01	µmol mol-1
month\time	0	1	2	3	4	5	6	7	8	9	10	11	12	13	14	15	16	17	18	19	20	21	22	23		Legend
JAN	4	4	5	8	11	5	10	13	11	11	15	13	5	4	3	4	5	7	7	5	3	6	5	3
FEB	2	2	2	2	2	3	3	5	10	7	4	4	4	5	2	3	2	3	5	2	3	2	2	2			<50
MAR	3	4	3	4	5	4	5	8	8	5	6	4	3	4	3	3	2	3	4	3	3	3	4	4			50-100
APR	8	15	12	20	12	9	25	17	14	11	14	12	13	11	8	6	5	4	5	7	6	9	8	11			100-150
MAY	18	9	15	14	11	20	41	17	14	15	23	17	18	18	18	12	10	6	5	10	8	19	30	9			150-200
JUN	12	14	16	13	16	36	57	23	14	19	23	22	24	25	20	13	11	6	4	7	9	19	15	11			200-300
JUL	33	45	41	31	21	80	64	25	20	22	24	23	23	21	18	14	12	5	6	7	11	34	30	31			300-400
AUG	16	15	14	27	21	31	55	33	25	14	11	15	11	10	10	9	9	9	16	7	8	16	9	11			400-500
SEP	9	7	14	18	18	20	19	59	43	18	10	7	6	6	7	5	3	7	5	9	14	12	7	10			500-600
OCT	10	4	13	12	8	10	10	29	17	17	13	9	8	9	8	3	2	7	5	5	5	9	11	8			>600
NOV	11	15	17	12	8	9	8	9	21	16	12	10	9	7	6	6	10	14	7	8	6	8	9	6
DEC	4	4	6	7	9	5	6	6	6	9	11	19	16	2	7	3	5	8	4	6	6	6	4	6
Number of intakes:			2	Length of the sampling period:						120	s	Unit:	0.01	µmol mol-1
month\time	0	1	2	3	4	5	6	7	8	9	10	11	12	13	14	15	16	17	18	19	20	21	22	23
JAN	9	5	7	10	17	5	6	6	6	11	18	8	9	5	3	5	6	5	6	3	4	4	3	6
FEB	2	2	1	2	2	4	3	4	13	8	5	3	4	6	3	2	2	1	2	3	3	3	2	2
MAR	2	5	4	4	4	3	4	8	5	6	9	5	4	4	3	3	3	2	3	3	3	3	2	3
APR	19	10	20	10	8	13	20	24	17	13	14	12	13	9	7	4	4	4	4	9	5	7	7	13
MAY	27	15	8	11	18	24	60	25	19	16	20	19	21	20	18	13	11	7	7	16	11	29	18	41
JUN	12	11	12	13	34	25	34	23	18	19	22	28	20	24	19	16	8	7	5	5	8	14	12	12
JUL	53	26	34	22	28	47	75	30	27	20	22	24	15	22	15	14	7	7	16	10	14	14	27	24
AUG	28	11	17	16	19	46	59	54	24	13	10	20	11	12	9	7	9	10	11	6	8	9	9	11
SEP	9	10	12	18	18	24	35	46	37	21	10	8	7	8	8	4	5	6	7	13	8	12	9	14
OCT	13	5	17	12	9	8	10	28	22	13	9	11	9	4	9	3	3	4	5	6	8	9	8	8
NOV	11	10	12	11	12	13	10	18	19	23	10	9	4	9	7	5	7	10	6	10	8	7	12	8
DEC	4	4	3	5	19	9	5	11	6	12	14	20	23	5	3	3	7	6	4	4	6	3	4	2
Number of intakes:			2	Length of the sampling period:						150	s	Unit:	0.01	µmol mol-1
month\time	0	1	2	3	4	5	6	7	8	9	10	11	12	13	14	15	16	17	18	19	20	21	22	23
JAN	6	6	4	21	19	3	11	10	11	16	15	8	8	5	5	5	4	8	5	4	4	7	4	6
FEB	2	3	1	2	3	4	5	2	7	6	5	4	4	5	2	3	3	3	3	3	4	2	2	3
MAR	3	3	3	5	6	4	4	9	7	8	5	7	4	3	4	3	2	4	2	3	6	3	3	3
APR	5	10	12	10	13	17	21	24	14	13	17	19	9	9	7	6	4	4	5	5	7	6	6	11
MAY	19	8	16	29	18	16	47	23	19	17	18	18	20	19	21	14	10	5	7	13	20	22	23	40
JUN	17	9	14	10	21	19	52	24	19	18	15	22	23	21	20	18	9	4	5	8	10	12	16	21
JUL	50	43	35	33	23	42	62	32	30	24	28	19	20	24	18	11	8	8	9	7	10	19	21	33
AUG	15	11	19	31	12	77	47	50	33	15	17	17	9	11	10	9	8	11	14	5	19	8	15	11
SEP	12	14	13	15	32	25	17	36	26	23	12	10	8	7	7	8	4	7	9	9	8	18	9	21
OCT	10	4	11	10	8	6	7	40	21	11	11	10	7	9	6	3	4	4	4	4	5	8	7	9
NOV	14	7	15	7	7	9	12	11	24	33	14	10	8	6	4	13	11	10	10	7	8	9	10	8
DEC	5	4	5	9	11	9	8	7	14	7	14	29	14	4	7	5	7	5	3	3	4	5	4	2
Number of intakes:			2	Length of the sampling period:						180	s	Unit:	0.01	µmol mol-1
month\time	0	1	2	3	4	5	6	7	8	9	10	11	12	13	14	15	16	17	18	19	20	21	22	23
JAN	9	3	4	11	34	5	9	8	8	10	17	7	7	5	4	3	5	3	4	3	4	4	5	7
FEB	2	3	2	2	2	3	3	2	10	11	4	2	3	6	3	3	3	2	4	3	5	2	4	2
MAR	3	2	3	4	4	5	3	10	9	11	7	5	3	4	3	2	2	3	5	3	4	4	5	4
APR	15	16	13	5	12	6	15	34	14	17	13	11	12	9	9	11	7	4	5	4	4	6	6	34
MAY	41	6	17	10	6	22	35	24	23	22	19	23	17	28	20	17	7	6	7	11	41	57	53	47
JUN	10	11	13	13	17	40	37	35	18	28	26	30	22	25	20	16	12	6	5	6	7	9	11	17
JUL	40	17	37	14	35	90	93	30	24	17	29	20	27	29	20	12	9	7	5	10	15	15	28	50
AUG	20	10	16	30	36	25	49	57	35	14	18	20	14	14	13	9	7	10	15	5	14	20	9	7
SEP	14	7	11	13	29	21	19	66	34	23	14	10	9	8	7	6	3	5	7	9	9	13	10	25
OCT	5	7	8	16	10	10	11	22	29	17	13	11	9	7	7	4	5	5	6	5	8	11	8	7
NOV	17	12	20	16	5	16	8	11	19	25	20	9	7	6	7	8	15	8	8	9	10	5	7	7
DEC	5	4	3	6	7	5	16	12	7	20	14	15	19	4	13	2	5	5	3	6	4	3	5	4
Number of intakes:			2	Length of the sampling period:						200	s	Unit:	0.01	µmol mol-1
month\time	0	1	2	3	4	5	6	7	8	9	10	11	12	13	14	15	16	17	18	19	20	21	22	23
JAN	10	5	4	8	7	3	9	8	6	11	10	12	5	4	6	4	5	8	6	5	3	4	3	5
FEB	2	2	1	2	1	3	2	4	18	6	6	4	4	5	3	3	2	3	4	4	4	2	3	2
MAR	2	4	5	3	5	3	6	11	7	6	7	7	4	3	4	4	3	5	4	5	4	2	4	3
APR	14	12	14	5	20	6	14	27	13	13	13	13	14	13	10	7	5	4	4	7	5	7	7	16
MAY	40	17	11	12	7	24	30	25	28	26	22	23	23	26	25	22	10	10	6	13	29	20	20	34
JUN	21	18	15	10	35	21	37	24	22	27	22	24	17	31	20	15	14	7	4	7	9	12	20	21
JUL	17	19	31	53	15	97	68	28	27	24	22	26	25	24	26	17	11	8	5	16	14	22	21	22
AUG	11	10	10	18	29	38	50	63	28	17	12	14	13	13	9	8	19	13	9	14	8	17	14	13
SEP	8	10	14	18	26	10	31	42	43	24	17	11	11	10	8	6	2	7	9	9	11	11	11	25
OCT	10	8	8	10	12	8	9	14	27	21	13	12	11	8	11	3	3	6	5	5	5	8	8	7
NOV	16	11	16	9	15	10	14	13	19	22	16	10	6	7	6	4	12	8	8	9	7	8	8	7
DEC	4	3	3	4	6	17	14	5	8	10	16	18	21	4	5	3	10	9	3	3	5	4	5	3
Number of intakes:			2	Length of the sampling period:						225	s	Unit:	0.01	µmol mol-1
month\time	0	1	2	3	4	5	6	7	8	9	10	11	12	13	14	15	16	17	18	19	20	21	22	23
JAN	13	9	10	9	29	6	17	8	5	14	17	7	10	6	7	4	6	5	5	3	2	3	5	4
FEB	2	2	2	2	2	2	5	4	14	18	4	4	5	6	3	3	5	3	4	4	4	2	2	3
MAR	4	5	3	8	3	2	6	13	10	6	7	5	5	5	4	4	3	5	5	5	4	4	3	3
APR	9	14	12	8	9	12	17	40	29	17	14	14	12	11	9	5	5	3	5	5	6	10	7	13
MAY	37	11	23	8	15	19	45	29	25	25	18	27	21	25	25	12	15	8	7	15	24	27	7	32
JUN	20	19	12	19	22	32	60	21	19	19	29	29	24	24	21	20	17	10	5	6	8	10	9	19
JUL	33	13	29	38	26	68	71	34	28	31	23	26	18	26	22	14	12	5	7	11	15	29	25	38
AUG	10	11	9	22	15	26	50	76	21	21	15	21	15	11	10	9	19	14	17	15	8	24	9	6
SEP	22	15	17	28	18	25	9	41	62	16	19	10	8	9	7	6	5	4	8	7	19	21	11	15
OCT	5	8	15	15	12	9	23	20	32	18	12	10	10	7	5	10	4	6	5	5	6	9	24	5
NOV	14	12	15	11	31	12	14	12	19	28	15	9	8	6	8	11	8	7	6	8	6	6	11	12
DEC	4	8	3	9	21	3	10	11	8	10	19	13	28	5	6	3	13	5	4	3	8	5	4	4
Number of intakes:			2	Length of the sampling period:						300	s	Unit:	0.01	µmol mol-1
month\time	0	1	2	3	4	5	6	7	8	9	10	11	12	13	14	15	16	17	18	19	20	21	22	23
JAN	6	13	6	11	6	6	7	15	9	11	17	13	11	6	7	9	5	7	7	3	4	5	6	9
FEB	2	2	1	1	3	5	4	6	9	8	8	5	6	4	3	2	4	3	3	3	4	2	3	2
MAR	4	4	4	3	5	6	5	6	12	7	12	7	5	4	4	3	3	3	3	4	4	3	3	4
APR	33	11	36	10	18	21	14	36	14	16	28	12	12	15	12	7	4	6	5	6	7	13	8	15
MAY	28	11	25	12	17	31	54	32	28	24	27	20	26	28	18	23	13	8	12	25	33	16	49	28
JUN	27	12	24	20	24	20	47	41	27	38	27	40	22	27	32	24	14	7	5	8	10	16	19	30
JUL	23	19	52	44	25	46	72	33	25	29	25	30	24	25	21	12	10	9	12	9	23	25	24	80
AUG	12	10	25	35	38	43	47	39	42	17	14	16	18	17	16	8	13	12	9	8	13	14	19	9
SEP	21	13	12	13	32	38	18	58	66	30	17	16	12	12	8	6	4	6	9	13	12	19	24	7
OCT	5	13	20	13	12	11	10	27	23	17	19	11	13	9	8	5	7	8	7	5	4	6	13	9
NOV	14	15	18	17	8	20	20	21	30	19	31	12	8	8	7	7	9	18	8	13	6	6	11	20
DEC	6	4	4	11	7	6	7	19	7	15	16	24	20	4	5	7	9	16	5	6	9	4	6	8
Number of intakes:			2	Length of the sampling period:						360	s	Unit:	0.01	µmol mol-1
month\time	0	1	2	3	4	5	6	7	8	9	10	11	12	13	14	15	16	17	18	19	20	21	22	23
JAN	5	9	5	12	24	5	14	6	5	13	34	11	7	9	6	8	5	7	6	4	3	4	5	7
FEB	2	4	2	2	3	6	10	5	15	10	6	5	6	6	5	4	3	3	3	5	5	2	3	2
MAR	4	4	3	4	5	5	5	11	12	8	8	5	6	4	6	6	3	5	4	4	7	4	3	6
APR	23	13	10	21	16	17	22	34	20	22	18	18	14	16	15	9	4	6	6	8	8	11	24	25
MAY	18	13	39	13	19	12	40	42	28	24	27	20	29	25	27	21	15	15	10	21	16	69	28	61
JUN	26	25	22	16	14	33	99	26	23	29	25	35	27	25	23	20	22	12	6	14	10	15	23	21
JUL	38	19	81	72	35	114	73	44	30	33	34	33	19	26	28	15	10	11	5	15	29	26	55	33
AUG	14	7	15	25	27	50	45	57	26	18	16	18	19	18	12	9	14	23	35	18	12	23	7	34
SEP	22	20	16	41	28	16	24	74	46	36	14	15	16	9	10	11	5	11	8	13	17	13	14	8
OCT	11	15	21	25	11	11	15	24	46	21	12	12	16	15	14	6	9	14	6	5	10	11	9	11
NOV	16	16	19	14	13	12	17	17	21	28	24	12	10	9	9	8	16	10	12	6	10	12	16	16
DEC	3	5	5	6	12	11	14	12	13	10	19	25	42	10	8	5	10	5	5	7	6	8	10	6
Number of intakes:			2	Length of the sampling period:						450	s	Unit:	0.01	µmol mol-1
month\time	0	1	2	3	4	5	6	7	8	9	10	11	12	13	14	15	16	17	18	19	20	21	22	23
JAN	10	7	7	20	24	7	13	12	11	20	15	14	12	9	6	6	5	5	5	7	5	3	5	6
FEB	3	2	3	4	4	4	10	4	11	8	7	7	9	5	6	4	6	4	3	4	6	4	4	4
MAR	5	4	4	5	8	5	9	7	10	12	12	8	7	4	5	6	4	4	4	7	5	12	8	7
APR	34	30	16	14	20	24	25	34	18	21	25	16	13	13	17	10	6	6	7	11	10	12	17	17
MAY	15	21	37	20	25	34	65	30	28	31	31	30	27	30	26	20	17	14	15	25	28	53	17	97
JUN	35	14	23	27	17	35	123	31	22	42	32	29	32	39	27	30	23	15	8	13	15	15	19	23
JUL	60	24	104	72	54	68	89	39	37	31	29	33	31	28	36	15	13	8	15	30	28	37	26	90
AUG	15	16	22	61	86	75	41	91	38	25	21	25	18	17	16	12	17	25	14	13	21	16	20	22
SEP	31	12	23	27	34	27	31	73	38	35	16	24	21	12	13	13	7	7	7	20	15	17	18	14
OCT	7	20	18	38	13	16	27	43	40	22	13	17	14	14	13	8	7	14	6	9	11	17	14	10
NOV	21	28	16	16	10	24	21	22	39	26	26	18	10	11	10	17	15	16	13	13	13	9	21	9
DEC	8	10	6	8	6	14	21	10	6	13	24	27	33	7	6	13	11	6	7	10	7	7	7	9
Number of intakes:			2	Length of the sampling period:						600	s	Unit:	0.01	µmol mol-1
month\time	0	1	2	3	4	5	6	7	8	9	10	11	12	13	14	15	16	17	18	19	20	21	22	23
JAN	10	18	6	15	19	11	6	29	18	20	33	13	10	11	14	10	7	10	6	8	9	10	7	10
FEB	2	7	4	4	4	7	9	5	12	10	6	6	6	10	11	6	6	6	6	10	5	4	4	5
MAR	6	5	9	10	11	13	10	12	11	14	8	10	7	10	8	6	4	7	7	8	8	8	9	7
APR	40	19	26	22	14	27	30	54	34	28	18	19	17	17	16	9	8	6	11	12	18	16	17	34
MAY	39	13	30	29	25	32	129	53	42	29	40	31	27	39	45	27	21	15	22	37	30	57	73	68
JUN	53	19	56	52	65	42	93	39	32	33	28	31	33	34	27	22	31	12	11	16	18	32	19	25
JUL	94	38	136	45	68	162	148	62	54	44	36	34	28	38	37	30	25	19	20	35	34	41	61	48
AUG	32	19	21	45	95	56	62	85	52	25	28	25	22	19	14	14	20	72	12	9	13	28	23	23
SEP	25	13	34	70	26	39	31	87	52	40	23	26	22	15	13	10	10	9	20	26	19	21	30	37
OCT	11	11	20	17	10	16	26	38	62	31	26	19	17	19	14	11	14	15	9	11	7	21	16	8
NOV	46	20	28	32	43	19	28	26	46	40	21	21	17	15	13	19	18	17	12	19	12	16	19	30
DEC	8	7	6	8	14	22	16	19	8	23	38	22	19	11	11	9	14	7	7	9	10	9	13	7
Number of intakes:			2	Length of the sampling period:						900	s	Unit:	0.01	µmol mol-1
month\time	0	1	2	3	4	5	6	7	8	9	10	11	12	13	14	15	16	17	18	19	20	21	22	23
JAN	17	14	10	32	27	17	45	27	16	32	32	17	22	20	17	20	22	17	12	8	11	8	14	16
FEB	6	8	7	11	7	10	8	12	31	16	10	13	14	15	12	11	11	10	10	15	10	9	9	8
MAR	14	9	9	10	9	14	18	16	20	20	16	14	13	11	9	13	9	9	8	11	15	10	9	18
APR	44	29	36	49	114	65	66	66	27	29	30	28	19	20	21	12	11	10	17	26	21	24	34	56
MAY	55	27	45	54	45	117	130	58	49	34	42	37	38	40	39	50	31	22	37	51	38	47	72	66
JUN	67	30	78	61	110	60	110	78	39	35	45	46	41	39	35	29	23	24	10	33	37	31	34	24
JUL	50	83	154	71	110	163	179	122	61	39	54	36	40	47	44	42	33	23	19	30	59	54	58	90
AUG	28	47	36	149	101	77	186	132	89	37	29	23	33	18	19	18	36	38	44	19	29	23	42	20
SEP	46	26	51	73	75	56	77	139	72	64	36	27	19	26	15	17	20	13	34	39	28	37	46	22
OCT	17	20	41	44	15	44	48	48	86	62	34	31	23	17	18	14	18	24	20	15	19	55	34	45
NOV	38	38	42	25	38	25	27	49	61	80	39	26	20	25	20	25	30	37	24	23	13	13	20	39
DEC	26	13	10	19	21	21	36	32	15	29	44	47	37	14	23	14	19	15	9	10	17	20	17	15
Number of intakes:			2	Length of the sampling period:						1800	s	Unit:	0.01	µmol mol-1
month\time	0	1	2	3	4	5	6	7	8	9	10	11	12	13	14	15	16	17	18	19	20	21	22	23
JAN	45	33	47	48	52	27	74	58	50	54	74	46	58	47	46	50	49	36	31	24	25	27	24	40
FEB	17	19	17	17	20	31	30	45	58	46	30	33	28	24	39	32	31	22	28	33	23	30	29	20
MAR	27	26	25	28	26	34	41	66	51	49	45	30	29	29	24	24	20	21	22	18	30	25	28	43
APR	135	142	71	119	80	103	140	141	81	87	56	36	29	34	27	25	22	36	48	54	54	46	95	93
MAY	143	83	76	190	114	249	528	178	169	103	60	64	54	67	52	57	63	41	61	97	103	121	66	180
JUN	56	39	161	135	268	199	319	195	93	79	82	47	64	75	47	52	71	35	36	59	97	67	52	47
JUL	215	190	306	161	232	293	354	310	111	85	80	70	49	50	73	58	47	44	51	101	104	113	117	120
AUG	88	79	118	424	195	257	394	272	264	109	87	49	50	44	38	56	79	76	73	37	81	58	65	109
SEP	132	135	107	253	183	115	182	347	203	116	95	82	39	47	34	26	36	39	34	60	60	67	80	66
OCT	30	46	76	74	56	66	90	122	224	126	69	58	57	36	64	30	46	35	39	41	70	69	86	34
NOV	90	89	85	75	84	54	65	80	107	197	108	73	44	52	59	74	60	76	60	48	81	38	54	62
DEC	46	32	32	33	51	38	53	55	31	51	89	94	99	34	48	34	55	33	27	32	30	32	33	38
Number of intakes:			3	Length of the sampling period:						100	s	Unit:	0.01	µmol mol-1
month\time	0	1	2	3	4	5	6	7	8	9	10	11	12	13	14	15	16	17	18	19	20	21	22	23
JAN	6	6	6	13	17	4	13	13	11	19	18	13	8	6	3	5	6	8	4	6	7	8	5	9
FEB	3	3	2	3	4	4	6	5	11	11	5	6	5	7	3	3	3	4	4	4	4	3	4	4
MAR	6	5	6	7	5	4	7	9	10	7	8	6	4	4	4	4	3	4	4	5	7	4	5	5
APR	22	15	15	9	19	19	31	37	20	16	18	21	15	13	11	8	7	6	7	9	9	10	11	17
MAY	16	8	12	25	29	26	80	30	27	26	32	26	28	20	36	21	16	8	7	12	17	51	58	57
JUN	27	17	16	15	27	39	54	30	25	25	27	33	28	31	24	25	16	8	7	11	14	17	14	20
JUL	58	33	34	35	25	74	70	48	33	31	32	27	33	30	28	15	13	10	13	15	21	23	31	39
AUG	16	17	20	40	27	37	70	60	39	23	22	21	14	16	14	11	12	17	13	8	18	23	18	22
SEP	28	11	23	21	41	43	21	53	33	32	18	12	10	9	10	9	4	8	8	11	17	16	13	27
OCT	11	9	17	14	14	16	17	40	31	16	17	14	11	11	11	5	6	8	10	6	7	13	16	9
NOV	17	15	14	17	17	13	11	13	32	37	21	16	7	8	6	8	12	12	15	13	10	10	11	9
DEC	11	5	6	6	8	8	7	8	13	10	12	30	14	8	7	5	5	6	6	5	7	8	4	4
Number of intakes:			3	Length of the sampling period:						120	s	Unit:	0.01	µmol mol-1
month\time	0	1	2	3	4	5	6	7	8	9	10	11	12	13	14	15	16	17	18	19	20	21	22	23
JAN	8	7	7	12	36	6	18	16	6	15	27	16	9	6	7	8	6	7	6	5	4	6	7	7
FEB	3	3	3	3	3	3	5	7	12	21	4	5	6	8	4	4	4	3	5	4	5	3	4	3
MAR	5	4	4	4	8	9	7	14	11	10	10	6	4	5	5	5	4	4	4	4	5	5	5	7
APR	21	24	13	10	18	19	31	38	24	20	18	21	14	14	13	8	6	6	6	8	8	10	11	18
MAY	43	14	20	23	19	51	52	31	30	32	29	35	28	29	30	26	16	7	8	13	20	40	27	40
JUN	20	15	27	18	39	46	54	33	24	28	30	29	28	30	32	21	16	9	8	10	10	17	15	18
JUL	38	42	53	47	48	75	111	48	34	22	40	35	34	28	26	19	12	10	10	16	16	26	32	59
AUG	12	18	21	30	26	36	84	74	32	19	30	22	16	16	14	13	10	15	16	11	12	37	13	15
SEP	24	22	20	29	31	29	20	72	43	33	15	15	11	8	10	8	5	9	9	11	20	16	17	27
OCT	12	11	12	21	13	12	13	39	29	19	15	18	13	10	11	5	7	7	9	7	10	13	14	6
NOV	20	17	17	16	12	16	13	20	32	37	22	12	12	8	9	8	16	14	10	12	11	9	10	15
DEC	5	6	5	8	7	6	16	9	15	17	26	17	19	5	10	4	8	6	4	6	7	5	6	5
Number of intakes:			3	Length of the sampling period:						150	s	Unit:	0.01	µmol mol-1
month\time	0	1	2	3	4	5	6	7	8	9	10	11	12	13	14	15	16	17	18	19	20	21	22	23
JAN	10	11	9	11	17	8	17	14	7	16	22	14	21	6	7	7	7	7	7	5	4	4	4	7
FEB	2	3	2	3	4	5	6	7	15	14	6	6	5	6	4	3	4	4	3	4	4	2	4	3
MAR	3	6	6	6	5	7	9	11	16	8	10	7	6	6	6	4	4	4	6	4	5	6	4	6
APR	13	15	16	12	14	16	25	60	25	24	20	21	17	13	13	8	8	6	6	7	9	12	13	17
MAY	40	13	28	25	17	37	55	44	28	26	30	34	28	39	43	23	16	13	9	29	34	28	33	53
JUN	18	20	23	24	33	43	55	38	22	28	38	44	32	30	37	23	17	10	7	7	8	18	20	26
JUL	57	24	45	53	37	108	114	40	34	27	33	40	34	27	30	18	14	12	14	18	20	25	36	38
AUG	17	17	14	33	24	48	51	72	40	25	21	19	16	18	14	14	16	13	25	15	11	34	14	18
SEP	21	13	17	23	32	32	23	63	60	30	18	19	10	10	10	7	6	7	11	11	17	22	21	12
OCT	12	9	24	26	15	11	25	27	35	24	12	15	11	14	12	9	6	9	6	7	9	14	24	11
NOV	11	15	20	17	14	14	18	13	26	30	19	12	10	8	8	13	15	13	10	12	10	9	12	12
DEC	7	8	4	9	14	9	12	10	13	14	22	23	28	5	8	7	12	13	8	8	11	8	6	5
Number of intakes:			3	Length of the sampling period:						200	s	Unit:	0.01	µmol mol-1
month\time	0	1	2	3	4	5	6	7	8	9	10	11	12	13	14	15	16	17	18	19	20	21	22	23
JAN	9	14	11	19	22	6	17	15	11	17	27	13	10	8	7	10	7	9	8	5	5	6	7	10
FEB	3	3	2	3	3	8	7	4	21	14	8	7	8	8	4	4	4	3	4	4	5	4	4	5
MAR	5	5	6	8	6	6	8	14	12	10	13	9	7	6	7	6	3	4	6	4	7	4	4	5
APR	19	18	35	12	22	22	34	41	22	24	21	21	17	16	12	12	6	7	8	9	9	17	10	29
MAY	25	17	22	18	20	29	82	42	33	30	33	26	35	29	31	29	15	8	10	24	62	30	86	33
JUN	19	13	29	21	31	49	64	41	28	35	36	34	34	29	40	29	26	10	9	11	13	17	18	22
JUL	35	29	54	35	34	80	95	48	38	42	35	40	32	31	32	19	14	11	15	18	34	31	60	88
AUG	14	11	29	35	29	55	52	85	57	25	20	22	20	21	20	12	15	23	15	10	26	22	16	16
SEP	28	13	19	23	38	37	28	60	44	38	21	19	15	15	10	11	6	10	11	12	23	15	18	9
OCT	9	16	23	19	17	12	16	49	44	25	24	20	14	12	14	7	8	12	12	8	7	13	23	8
NOV	22	19	25	18	16	16	28	21	29	26	27	19	11	10	11	8	21	16	14	16	11	9	18	14
DEC	9	6	7	10	21	11	13	14	9	13	23	31	19	7	8	6	13	15	6	10	11	5	8	7
Number of intakes:			3	Length of the sampling period:						240	s	Unit:	0.01	µmol mol-1
month\time	0	1	2	3	4	5	6	7	8	9	10	11	12	13	14	15	16	17	18	19	20	21	22	23
JAN	11	9	18	17	26	6	16	20	10	21	32	20	10	8	8	8	6	9	8	5	6	6	8	9
FEB	2	4	3	5	4	8	13	5	18	18	9	9	7	10	6	5	4	3	4	5	5	3	4	3
MAR	7	5	5	5	8	10	12	12	16	12	11	11	7	7	6	5	6	5	7	4	8	6	6	7
APR	22	20	25	16	24	14	30	59	31	29	20	23	19	21	16	12	7	7	7	12	10	16	17	17
MAY	47	12	33	21	15	26	62	38	34	31	41	32	33	32	44	30	18	17	12	25	31	49	42	54
JUN	33	20	22	30	14	57	69	42	28	41	34	41	38	47	29	31	24	15	8	16	13	14	23	23
JUL	63	52	82	95	86	115	182	47	41	34	38	41	33	36	44	24	19	10	17	22	40	31	62	46
AUG	18	14	19	45	31	46	78	122	52	30	24	26	19	22	17	15	15	33	29	12	32	18	25	30
SEP	36	27	23	47	28	77	23	85	76	36	39	16	15	13	11	15	7	6	12	20	12	16	19	19
OCT	14	14	24	24	22	20	26	38	48	24	19	16	20	15	12	8	9	14	9	7	12	16	11	10
NOV	30	17	26	24	19	19	19	24	32	35	28	18	13	14	12	11	21	17	13	14	14	14	16	15
DEC	8	7	7	15	9	10	27	16	11	12	19	32	44	17	13	9	12	16	8	10	9	8	11	9
Number of intakes:			3	Length of the sampling period:						300	s	Unit:	0.01	µmol mol-1
month\time	0	1	2	3	4	5	6	7	8	9	10	11	12	13	14	15	16	17	18	19	20	21	22	23
JAN	11	10	11	23	36	7	16	15	16	30	26	19	18	12	11	9	8	8	9	8	8	6	6	8
FEB	3	5	4	4	5	8	8	5	12	17	6	7	8	8	6	6	5	6	4	5	6	4	5	4
MAR	6	5	8	9	7	5	11	11	14	12	16	13	8	7	7	7	4	6	6	9	8	7	8	8
APR	50	31	12	16	34	25	39	48	31	29	24	20	21	18	17	10	8	8	10	15	17	12	17	26
MAY	30	12	42	17	27	42	84	43	37	40	44	38	39	40	39	29	17	20	27	20	44	53	61	80
JUN	41	26	46	32	29	60	93	46	31	41	38	42	36	43	44	38	23	13	9	29	13	23	26	33
JUL	67	34	110	85	82	100	161	56	57	41	46	44	29	42	40	22	23	13	24	32	40	39	42	99
AUG	20	17	44	67	54	89	64	109	47	24	33	28	21	30	21	18	24	28	17	16	21	19	28	21
SEP	40	24	23	34	49	52	46	102	60	33	33	27	22	13	15	15	10	9	17	17	31	22	25	33
OCT	9	15	18	27	22	16	16	39	41	32	25	19	19	19	16	9	10	10	11	10	11	25	20	12
NOV	26	30	33	21	26	27	31	24	56	41	31	22	16	13	12	19	19	18	18	20	14	15	15	14
DEC	12	8	8	10	22	18	18	10	13	14	34	27	39	11	15	9	20	6	9	10	15	8	9	8
Number of intakes:			3	Length of the sampling period:						400	s	Unit:	0.01	µmol mol-1
month\time	0	1	2	3	4	5	6	7	8	9	10	11	12	13	14	15	16	17	18	19	20	21	22	23
JAN	14	20	8	21	65	13	26	23	18	25	40	22	15	14	12	16	10	13	7	8	7	12	9	12
FEB	4	7	4	5	6	12	10	7	22	17	9	10	9	10	8	7	8	5	8	8	5	4	6	4
MAR	8	7	7	11	10	11	13	11	14	16	17	11	9	10	9	7	6	6	9	10	12	7	12	10
APR	42	61	34	23	45	28	43	55	35	31	28	23	22	21	25	13	10	11	13	18	21	22	26	30
MAY	55	18	20	27	28	33	116	71	46	38	45	40	36	48	53	33	24	20	27	56	28	77	89	101
JUN	40	36	55	49	71	53	90	61	43	53	44	49	49	55	43	36	31	21	12	19	20	28	20	38
JUL	97	53	142	72	74	156	195	67	62	59	50	37	40	49	42	31	28	16	20	49	49	37	68	85
AUG	37	21	19	80	40	68	84	90	73	34	34	29	27	23	21	22	22	48	19	14	15	28	35	32
SEP	33	16	42	57	73	74	61	101	74	54	41	31	22	21	22	16	9	10	25	29	23	25	37	29
OCT	26	11	37	23	21	24	33	41	69	48	28	29	25	20	21	13	14	21	17	11	14	23	20	18
NOV	39	25	33	32	31	26	28	28	46	40	44	21	21	21	17	26	22	26	20	25	14	17	22	20
DEC	10	12	8	11	23	19	26	20	12	30	33	26	47	9	13	22	24	8	10	10	15	10	13	12
Number of intakes:			3	Length of the sampling period:						600	s	Unit:	0.01	µmol mol-1
month\time	0	1	2	3	4	5	6	7	8	9	10	11	12	13	14	15	16	17	18	19	20	21	22	23
JAN	25	14	18	40	44	18	62	52	24	53	40	27	28	23	18	23	24	18	13	17	11	9	15	19
FEB	6	9	11	11	12	12	26	12	39	18	13	12	13	21	13	13	14	14	10	11	14	10	12	8
MAR	12	10	11	16	11	12	20	14	19	25	22	17	14	10	15	13	8	11	14	10	17	13	11	19
APR	58	49	45	66	119	84	65	79	46	33	31	33	25	32	27	16	11	16	17	25	29	24	54	63
MAY	80	36	44	50	49	92	184	60	61	43	50	44	51	51	49	54	35	31	43	58	117	85	63	73
JUN	55	66	91	71	132	77	116	89	48	48	50	50	51	60	53	40	39	32	16	35	28	36	53	56
JUL	92	94	213	84	100	150	194	98	97	56	63	60	43	52	52	34	33	28	35	52	75	68	85	158
AUG	30	58	49	190	96	138	190	141	91	40	38	35	29	27	27	26	36	42	36	23	32	32	63	40
SEP	79	49	53	95	86	68	83	149	98	83	54	32	31	32	23	18	22	14	27	44	32	47	43	35
OCT	32	28	66	45	17	39	38	72	122	76	45	44	30	21	24	16	25	26	26	20	22	45	44	42
NOV	51	46	56	46	51	51	47	39	59	90	47	33	23	34	31	28	42	42	31	29	22	21	26	42
DEC	35	19	15	18	24	26	40	32	22	33	44	61	52	14	23	26	28	21	16	16	24	22	18	18
Number of intakes:			3	Length of the sampling period:						1200	s	Unit:	0.01	µmol mol-1
month\time	0	1	2	3	4	5	6	7	8	9	10	11	12	13	14	15	16	17	18	19	20	21	22	23
JAN	34	35	42	91	76	41	72	65	55	80	67	65	74	44	47	50	51	50	41	27	24	29	24	42
FEB	17	22	24	22	24	21	30	40	66	49	30	34	34	37	31	33	40	26	27	39	24	30	28	26
MAR	29	28	41	34	32	33	46	72	49	57	47	30	29	30	27	32	24	25	28	23	33	34	31	32
APR	131	135	112	103	152	141	194	164	106	68	59	49	38	36	34	32	27	41	48	56	60	57	105	154
MAY	138	98	70	182	131	252	548	174	223	116	83	68	70	75	71	88	74	61	66	121	92	141	99	147
JUN	87	64	136	135	247	192	262	185	106	98	85	58	69	108	70	64	69	46	38	63	88	92	66	66
JUL	190	234	395	187	201	293	376	381	147	90	78	80	49	70	78	68	60	46	60	92	132	178	144	204
AUG	121	93	105	457	336	226	420	390	233	118	88	69	59	52	43	53	86	119	72	58	72	96	79	68
SEP	165	75	126	220	136	226	214	340	206	162	107	82	52	46	34	30	72	44	53	79	69	74	88	77
OCT	28	44	81	90	45	71	124	150	241	135	77	56	60	41	52	34	53	45	45	33	59	81	102	51
NOV	127	85	90	78	128	65	63	97	103	174	101	69	44	62	64	71	75	84	63	70	55	48	49	61
DEC	55	34	38	52	48	49	74	69	29	55	117	108	124	34	53	37	51	44	34	30	29	39	48	46
Number of intakes:			4	Length of the sampling period:						100	s	Unit:	0.01	µmol mol-1
month\time	0	1	2	3	4	5	6	7	8	9	10	11	12	13	14	15	16	17	18	19	20	21	22	23
JAN	12	8	9	18	20	7	16	15	14	21	35	15	10	7	6	7	8	10	11	7	5	7	6	6
FEB	3	4	3	4	3	6	5	7	19	10	7	6	5	6	5	5	5	5	4	5	7	4	4	4
MAR	5	7	6	10	9	8	10	16	12	10	10	9	6	6	5	5	4	6	6	6	7	5	5	6
APR	23	23	16	19	23	18	31	41	25	21	23	26	19	16	15	12	8	7	8	13	11	14	15	17
MAY	63	28	26	34	15	53	66	33	34	29	36	34	34	40	30	24	18	13	8	19	41	35	29	32
JUN	20	22	24	30	38	53	50	42	29	36	41	34	39	44	30	28	21	11	7	11	15	23	33	24
JUL	67	51	69	44	33	149	134	44	42	40	40	49	46	40	39	22	19	12	14	18	26	32	50	69
AUG	22	18	26	38	28	47	85	96	50	27	21	27	20	20	19	14	21	23	15	13	17	25	17	17
SEP	20	27	29	29	34	39	42	77	73	36	22	16	15	13	12	9	5	8	11	16	25	20	16	28
OCT	17	14	18	21	18	13	16	38	44	21	16	16	18	13	13	7	6	10	9	10	12	14	17	13
NOV	17	24	29	19	17	19	19	24	36	31	30	15	13	12	11	13	20	17	10	16	12	15	14	13
DEC	9	7	7	9	19	11	13	17	10	18	21	31	23	7	11	6	13	8	8	8	14	10	7	8
Number of intakes:			4	Length of the sampling period:						150	s	Unit:	0.01	µmol mol-1
month\time	0	1	2	3	4	5	6	7	8	9	10	11	12	13	14	15	16	17	18	19	20	21	22	23
JAN	13	12	6	19	34	7	15	19	16	22	30	18	15	9	10	10	8	11	11	8	6	9	6	12
FEB	3	3	2	5	4	7	8	8	24	16	10	8	8	8	5	4	5	5	5	5	6	5	5	5
MAR	7	6	5	9	10	9	7	15	19	13	13	11	7	6	7	5	5	5	4	5	8	5	5	7
APR	40	17	31	15	37	33	32	37	25	30	26	26	20	18	14	13	9	7	7	11	11	15	13	31
MAY	24	22	24	33	32	33	74	54	39	29	44	40	38	39	38	30	21	12	12	31	51	37	78	59
JUN	36	18	30	25	39	44	86	47	37	42	43	48	42	40	44	36	23	10	10	14	15	25	28	26
JUL	77	37	56	59	35	99	110	63	43	48	47	36	38	38	39	22	21	16	14	19	34	33	59	80
AUG	17	25	36	45	53	90	80	89	67	29	26	25	20	21	21	16	17	28	23	12	24	19	26	16
SEP	21	22	22	25	60	54	28	85	61	54	25	22	17	16	14	13	7	10	16	19	25	24	21	19
OCT	13	13	22	23	22	18	12	45	43	26	26	22	15	15	15	6	10	15	15	8	13	14	27	12
NOV	27	21	26	18	14	22	26	20	33	38	31	19	13	9	15	14	14	16	19	16	10	12	14	11
DEC	9	5	6	12	23	15	13	23	15	18	23	40	33	8	8	8	19	13	7	13	12	8	8	7
Number of intakes:			4	Length of the sampling period:						180	s	Unit:	0.01	µmol mol-1
month\time	0	1	2	3	4	5	6	7	8	9	10	11	12	13	14	15	16	17	18	19	20	21	22	23
JAN	13	12	11	25	39	6	15	18	13	22	34	11	14	11	8	8	9	10	9	5	7	7	7	10
FEB	3	4	3	5	4	5	13	7	30	16	9	8	8	10	7	6	5	4	5	6	5	4	5	4
MAR	6	6	7	6	11	9	8	13	13	15	17	11	8	8	8	7	4	5	7	5	10	6	6	7
APR	39	26	27	20	34	20	31	60	31	32	23	25	23	23	20	14	9	10	8	13	10	13	27	31
MAY	43	19	41	28	21	60	90	57	50	35	41	37	39	43	40	32	22	20	15	27	42	38	49	99
JUN	29	20	37	35	39	72	97	57	31	55	49	50	43	47	41	35	31	13	9	20	13	21	24	21
JUL	61	39	81	78	87	181	162	62	47	41	49	49	46	38	40	25	17	16	14	23	26	25	53	61
AUG	28	22	28	56	35	67	90	110	54	34	29	29	25	22	20	17	17	25	32	14	25	36	29	35
SEP	30	15	31	36	50	81	42	116	69	46	36	23	18	17	13	14	8	9	14	22	21	19	23	19
OCT	12	17	25	25	20	16	16	32	56	27	19	20	17	16	17	11	9	14	10	10	16	19	13	13
NOV	27	26	32	30	24	20	26	31	43	41	31	22	14	15	14	13	22	19	14	16	16	16	21	15
DEC	7	7	7	15	15	18	23	26	22	20	25	48	48	10	16	7	18	15	11	12	11	8	14	11
Number of intakes:			4	Length of the sampling period:						225	s	Unit:	0.01	µmol mol-1
month\time	0	1	2	3	4	5	6	7	8	9	10	11	12	13	14	15	16	17	18	19	20	21	22	23
JAN	13	15	13	19	44	11	23	21	15	37	31	19	21	11	10	11	10	8	10	7	9	6	9	10
FEB	3	5	4	4	8	8	13	9	24	16	7	12	9	10	8	6	7	7	5	6	8	4	6	5
MAR	9	8	7	10	7	7	11	17	16	15	16	12	8	8	8	8	5	6	8	10	10	9	7	9
APR	46	33	21	17	23	27	42	77	37	31	26	23	27	21	17	15	11	9	11	15	13	18	24	35
MAY	44	20	39	23	29	40	114	46	42	44	46	49	44	53	42	32	21	20	29	34	80	73	40	84
JUN	46	31	33	35	33	53	94	55	35	51	49	47	48	52	47	42	29	18	13	28	15	26	23	32
JUL	101	40	117	76	74	123	194	64	54	54	53	51	38	48	51	26	21	12	15	33	40	43	53	87
AUG	23	20	30	56	103	104	80	146	56	37	35	31	25	28	25	21	22	35	20	16	25	21	39	31
SEP	49	27	23	50	57	50	28	104	103	45	35	27	21	18	16	16	10	11	14	27	29	28	23	26
OCT	15	18	33	23	22	21	26	48	60	32	27	22	25	19	19	13	10	14	13	11	13	23	21	12
NOV	29	35	37	20	29	32	31	26	64	42	31	23	16	17	14	20	21	18	16	25	16	17	22	16
DEC	11	11	8	10	15	11	25	17	15	19	34	55	44	12	18	15	15	8	9	9	17	9	13	9
Number of intakes:			4	Length of the sampling period:						300	s	Unit:	0.01	µmol mol-1
month\time	0	1	2	3	4	5	6	7	8	9	10	11	12	13	14	15	16	17	18	19	20	21	22	23
JAN	14	18	11	33	79	14	37	26	23	36	34	25	16	16	15	17	10	13	9	11	9	12	12	12
FEB	4	7	4	5	6	16	14	6	23	21	13	11	10	12	10	8	8	7	7	9	8	6	8	6
MAR	8	8	9	8	15	13	15	14	16	21	14	15	10	10	9	8	7	8	10	12	13	9	13	9
APR	47	61	68	22	37	40	42	66	42	37	32	28	26	24	23	15	11	11	14	21	30	25	33	42
MAY	86	21	53	27	36	71	118	75	54	43	50	47	44	54	59	41	32	22	30	61	63	75	67	68
JUN	47	40	57	68	91	70	119	63	47	54	52	57	56	62	48	45	38	27	13	22	22	32	29	41
JUL	93	61	171	89	85	118	185	83	68	64	64	53	46	45	56	41	37	19	19	49	52	43	77	86
AUG	40	29	37	93	81	73	109	100	84	38	38	36	32	28	26	25	25	46	31	15	22	27	38	39
SEP	49	21	48	58	70	68	71	113	103	61	35	33	30	22	22	15	13	13	22	24	32	31	48	36
OCT	22	18	58	46	23	30	30	58	66	45	37	29	27	22	21	12	15	20	26	14	13	21	23	23
NOV	40	30	37	36	40	37	37	30	50	54	51	28	19	22	18	25	25	31	20	29	16	22	26	32
DEC	13	13	11	17	28	23	24	33	13	35	44	45	64	9	13	21	25	13	13	11	19	11	17	11
Number of intakes:			4	Length of the sampling period:						450	s	Unit:	0.01	µmol mol-1
month\time	0	1	2	3	4	5	6	7	8	9	10	11	12	13	14	15	16	17	18	19	20	21	22	23
JAN	21	18	16	41	53	25	61	34	23	53	47	30	30	24	21	30	23	18	13	22	13	13	19	21
FEB	7	9	7	11	11	10	18	12	57	26	14	13	16	21	13	13	14	14	11	13	17	9	10	8
MAR	14	13	13	15	13	17	16	21	24	22	25	19	15	13	13	16	10	12	15	15	15	17	12	20
APR	61	66	53	51	53	63	64	87	44	34	36	37	23	28	30	19	14	19	22	29	28	28	60	77
MAY	79	45	60	57	54	119	196	79	56	52	57	49	58	58	56	52	37	31	43	61	110	83	85	98
JUN	54	55	101	93	105	74	141	96	50	51	63	59	58	69	53	42	45	27	16	35	33	43	74	50
JUL	114	95	219	113	144	158	205	118	99	62	66	57	62	61	63	44	37	30	37	51	92	73	103	137
AUG	31	54	50	185	159	154	164	165	112	50	42	41	36	33	30	31	45	45	40	26	25	40	53	41
SEP	87	63	58	88	119	101	85	143	106	92	43	35	39	31	26	22	20	18	28	52	42	50	54	35
OCT	27	25	70	62	25	43	38	93	114	66	49	41	32	26	22	18	27	34	29	22	27	57	44	36
NOV	48	53	48	48	52	59	47	67	79	94	48	39	25	31	28	32	48	45	37	32	30	19	30	40
DEC	27	21	16	25	21	34	44	41	28	42	55	68	50	18	23	23	26	21	18	17	27	25	18	18
Number of intakes:			4	Length of the sampling period:						900	s	Unit:	0.01	µmol mol-1
month\time	0	1	2	3	4	5	6	7	8	9	10	11	12	13	14	15	16	17	18	19	20	21	22	23
JAN	41	41	51	87	69	42	75	65	49	87	75	60	54	48	42	59	52	53	32	27	25	34	25	47
FEB	19	21	24	21	26	42	35	44	65	51	31	35	34	36	29	37	41	26	29	42	29	31	36	26
MAR	25	30	43	34	31	36	54	65	55	56	44	32	29	29	28	32	23	27	27	29	37	40	39	44
APR	166	139	107	90	321	146	208	189	125	80	60	54	41	39	37	36	28	34	47	64	58	61	104	182
MAY	136	74	84	194	141	244	523	192	208	120	102	72	77	84	73	88	65	61	65	135	90	142	116	177
JUN	98	74	193	145	238	191	325	187	88	101	86	74	78	97	73	69	86	45	38	63	89	97	71	77
JUL	290	264	303	183	264	373	419	353	145	115	92	88	63	77	91	67	63	52	62	121	143	171	146	224
AUG	96	95	171	461	408	271	392	425	243	125	81	70	62	52	45	68	83	134	94	61	64	110	97	118
SEP	199	143	150	204	252	258	239	334	245	147	108	90	47	51	43	32	61	46	57	84	76	82	126	76
OCT	35	66	76	88	56	71	126	130	280	143	79	65	57	41	50	36	58	57	46	39	57	98	98	59
NOV	115	101	120	87	130	82	68	103	128	183	97	70	48	56	62	78	80	85	67	58	66	52	61	78
DEC	59	39	38	52	60	53	65	75	38	72	122	87	136	39	47	37	58	43	31	36	36	37	53	44
Number of intakes:			5	Length of the sampling period:						120	s	Unit:	0.01	µmol mol-1
month\time	0	1	2	3	4	5	6	7	8	9	10	11	12	13	14	15	16	17	18	19	20	21	22	23
JAN	14	15	10	18	17	8	19	25	18	26	28	18	13	11	7	11	10	13	11	8	9	10	9	12
FEB	4	4	3	5	4	8	8	13	22	17	10	9	10	9	7	5	5	4	5	5	8	4	4	4
MAR	9	6	8	11	8	11	8	16	15	15	14	11	8	8	7	7	6	7	6	6	9	6	5	8
APR	39	30	38	17	43	38	38	44	30	33	32	25	22	22	16	14	9	8	11	13	12	16	14	39
MAY	36	27	30	26	38	47	101	49	43	36	45	43	44	42	41	29	23	15	13	32	41	69	59	49
JUN	35	23	34	28	52	60	91	44	40	51	43	48	49	53	41	39	29	13	9	15	15	26	27	29
JUL	74	44	92	52	53	122	130	60	46	48	51	44	47	45	41	28	23	17	22	21	38	41	82	85
AUG	28	36	37	42	37	55	86	99	71	36	26	29	23	23	23	21	18	27	25	17	18	41	28	23
SEP	39	28	26	32	40	49	38	111	66	52	27	22	18	19	16	14	7	13	13	23	31	25	22	20
OCT	23	20	28	26	16	24	20	48	38	34	31	22	18	15	15	8	10	13	15	8	13	17	25	14
NOV	29	23	31	22	26	22	26	27	41	48	43	16	15	10	15	12	19	24	16	21	15	12	16	18
DEC	13	7	6	14	19	15	15	24	17	18	32	42	33	9	10	10	16	21	8	9	13	9	10	7
Number of intakes:			5	Length of the sampling period:						180	s	Unit:	0.01	µmol mol-1
month\time	0	1	2	3	4	5	6	7	8	9	10	11	12	13	14	15	16	17	18	19	20	21	22	23
JAN	14	11	12	30	39	12	22	23	20	30	34	17	18	15	12	11	11	10	10	9	9	9	8	10
FEB	4	5	5	7	7	9	12	7	24	18	9	11	9	9	6	8	7	7	5	6	7	6	7	6
MAR	8	8	7	12	12	10	8	19	19	16	18	16	8	9	8	8	6	7	8	10	12	8	10	9
APR	59	34	34	18	49	28	50	93	40	34	39	27	29	25	19	14	14	9	12	15	17	22	29	32
MAY	32	23	53	45	37	48	125	57	49	49	52	51	50	52	49	35	26	22	32	36	72	70	57	93
JUN	51	26	48	44	36	78	115	58	40	52	53	59	50	58	50	45	32	17	12	30	17	30	32	32
JUL	93	40	122	114	78	162	175	78	62	54	53	60	47	56	51	28	26	16	23	34	41	51	55	92
AUG	23	31	49	77	58	94	78	134	71	33	37	32	25	27	26	22	24	41	29	20	25	33	43	33
SEP	39	23	36	42	66	68	37	107	90	55	27	32	24	21	18	16	12	14	17	21	35	34	27	28
OCT	19	18	28	36	23	28	31	57	62	36	29	27	23	26	19	11	13	15	15	13	12	31	19	15
NOV	39	36	34	23	28	33	33	33	61	53	37	30	17	17	15	20	25	24	20	28	20	17	26	19
DEC	12	9	9	17	19	19	18	15	11	21	34	37	48	9	15	16	24	13	9	11	13	12	12	10
Number of intakes:			5	Length of the sampling period:						240	s	Unit:	0.01	µmol mol-1
month\time	0	1	2	3	4	5	6	7	8	9	10	11	12	13	14	15	16	17	18	19	20	21	22	23
JAN	13	21	10	31	81	15	23	30	23	35	46	21	17	16	15	20	10	15	10	11	10	13	12	15
FEB	4	8	5	7	8	16	14	8	25	19	13	11	11	13	11	9	9	7	6	8	10	6	8	6
MAR	10	9	8	11	13	15	13	21	17	18	17	15	10	12	9	10	7	10	11	10	10	10	12	9
APR	59	49	51	28	69	44	46	73	45	42	40	32	30	27	27	18	13	11	13	20	27	29	35	29
MAY	79	36	56	26	39	48	134	69	55	44	58	55	50	58	60	42	33	23	29	40	63	75	97	89
JUN	43	41	54	62	97	66	122	64	54	59	59	59	57	70	50	52	39	28	13	28	23	34	39	54
JUL	134	74	158	100	81	181	220	109	74	61	66	50	59	55	63	45	36	20	26	47	55	51	108	110
AUG	38	24	24	90	76	76	109	138	94	45	40	37	35	29	27	26	27	66	49	21	21	28	33	39
SEP	51	26	48	76	80	82	51	117	117	80	40	33	33	26	24	19	13	12	20	32	45	33	48	41
OCT	29	23	62	32	21	26	39	54	77	53	37	29	31	25	23	13	16	20	25	14	18	27	25	22
NOV	47	35	44	39	42	32	37	33	44	82	48	28	25	23	19	29	31	32	19	32	18	20	27	30
DEC	14	13	9	16	32	26	36	32	18	36	46	44	65	14	16	27	23	12	15	13	16	12	14	13
Number of intakes:			5	Length of the sampling period:						360	s	Unit:	0.01	µmol mol-1
month\time	0	1	2	3	4	5	6	7	8	9	10	11	12	13	14	15	16	17	18	19	20	21	22	23
JAN	25	24	20	58	69	19	63	68	26	63	43	34	31	26	22	30	27	19	15	21	14	13	18	22
FEB	7	11	9	12	12	10	16	14	42	24	16	20	15	24	13	13	16	15	12	12	14	11	13	9
MAR	13	13	14	23	14	11	18	23	26	24	21	18	15	14	14	17	9	12	17	15	19	14	13	19
APR	63	77	65	60	104	66	71	112	50	37	39	41	35	33	31	21	15	19	20	29	32	28	69	80
MAY	95	48	57	47	53	101	194	82	59	56	73	58	63	73	63	64	41	32	37	78	101	114	99	67
JUN	72	63	88	86	137	75	144	97	62	54	67	77	63	83	61	57	46	31	16	44	37	41	63	68
JUL	120	91	221	128	142	219	277	114	107	75	75	69	68	63	71	51	42	35	36	52	92	84	114	171
AUG	36	56	50	221	106	109	175	178	99	52	43	45	45	37	35	31	46	48	51	31	38	49	71	55
SEP	79	55	56	93	131	116	78	134	133	93	58	42	40	32	26	24	21	18	29	61	49	45	57	36
OCT	21	37	69	57	26	46	46	80	112	88	48	41	32	27	32	18	27	32	32	23	30	59	38	36
NOV	57	46	63	43	55	72	58	70	84	95	56	36	26	31	28	31	51	49	35	32	26	26	27	44
DEC	27	18	18	21	27	33	45	36	21	39	61	65	66	17	29	26	21	24	18	16	35	27	24	26
Number of intakes:			5	Length of the sampling period:						720	s	Unit:	0.01	µmol mol-1
month\time	0	1	2	3	4	5	6	7	8	9	10	11	12	13	14	15	16	17	18	19	20	21	22	23
JAN	41	43	51	77	84	48	81	73	61	82	76	66	60	49	45	60	55	48	35	29	24	39	31	52
FEB	19	24	26	21	25	35	39	44	73	52	33	34	33	40	34	39	38	27	29	44	27	30	39	26
MAR	29	32	38	38	35	34	50	67	54	60	43	34	31	30	30	33	22	28	28	29	40	47	35	45
APR	182	178	132	107	262	164	244	217	118	80	66	55	43	41	41	36	30	42	51	70	57	63	121	163
MAY	150	93	73	141	123	248	642	214	171	117	97	83	83	88	85	103	74	60	80	140	115	140	143	176
JUN	113	61	192	154	287	197	323	190	93	101	108	68	80	107	72	80	80	52	39	62	105	108	76	81
JUL	266	233	355	218	272	345	413	392	171	129	99	86	64	80	93	73	60	54	71	110	167	170	194	252
AUG	123	105	173	453	378	282	403	390	252	135	94	83	64	53	52	53	91	149	106	66	80	99	103	129
SEP	234	86	165	294	240	285	261	362	212	167	114	86	59	53	42	34	71	47	60	105	77	96	123	77
OCT	40	60	105	76	66	82	130	141	265	142	87	67	58	43	58	37	58	69	60	42	58	97	98	56
NOV	117	106	130	81	106	72	70	95	131	201	133	72	51	67	59	74	88	91	65	76	77	56	60	76
DEC	60	38	42	52	65	52	74	89	34	65	125	88	132	38	45	37	59	52	43	40	37	45	50	48

## Sheet: FigS7
SPLINE INTERPOLATION - MEDIAN OF ABSOLUTE DEVIATIONS
Number of intakes:			2	Length of the sampling period:						100	s	Unit:	0.01	µmol mol-1
month\time	0	1	2	3	4	5	6	7	8	9	10	11	12	13	14	15	16	17	18	19	20	21	22	23		Legend
JAN	2	2	2	3	4	2	4	5	4	4	6	5	3	2	2	2	2	3	2	2	1	3	2	2
FEB	1	1	1	1	1	1	1	2	3	2	2	1	2	2	1	1	1	1	2	1	1	1	1	1			<50
MAR	2	2	1	2	2	2	2	3	3	2	3	2	2	2	1	2	1	1	2	2	2	1	2	2			50-100
APR	5	5	5	6	6	6	10	7	5	6	6	5	6	4	4	3	2	2	2	3	3	4	3	5			100-150
MAY	8	4	7	7	5	12	18	9	8	8	11	9	8	9	9	7	5	3	2	5	4	11	10	4			150-200
JUN	6	6	6	6	8	13	21	12	7	12	13	11	11	11	8	6	5	2	2	4	5	7	6	6			200-300
JUL	18	19	14	14	9	33	32	12	10	12	11	9	11	10	9	6	6	2	3	3	6	13	11	11			300-400
AUG	8	5	7	11	10	28	22	17	12	6	5	6	5	6	5	4	6	3	6	4	5	6	5	6			400-500
SEP	4	3	6	8	9	8	8	20	17	7	5	3	3	3	3	2	2	3	3	4	6	5	3	4			500-600
OCT	4	2	5	5	5	5	4	9	7	9	5	4	3	3	5	1	1	3	2	3	3	4	5	4			>600
NOV	5	5	7	5	4	6	5	4	8	8	6	4	3	3	3	3	4	5	3	4	3	3	4	3
DEC	2	2	2	2	3	2	2	3	3	4	4	7	4	2	3	2	2	3	2	2	3	3	2	3
Number of intakes:			2	Length of the sampling period:						120	s	Unit:	0.01	µmol mol-1
month\time	0	1	2	3	4	5	6	7	8	9	10	11	12	13	14	15	16	17	18	19	20	21	22	23
JAN	4	3	2	6	6	2	3	3	3	4	5	5	4	2	1	2	3	2	2	2	2	2	2	3
FEB	1	1	1	1	1	1	2	2	5	3	2	1	2	2	1	1	1	1	1	1	1	1	1	1
MAR	1	2	2	2	2	2	2	4	2	3	4	2	2	2	2	1	1	1	1	1	1	1	1	1
APR	7	4	6	4	5	6	7	10	7	7	6	6	5	4	4	4	2	2	2	4	2	3	3	5
MAY	10	7	4	5	8	12	20	11	10	8	9	9	9	9	10	7	5	3	3	7	6	12	9	18
JUN	6	6	6	6	10	11	17	9	8	9	11	12	10	11	8	8	4	3	2	3	5	7	6	6
JUL	22	11	12	14	12	30	28	14	11	10	13	13	8	11	8	6	3	3	5	4	6	9	12	11
AUG	10	7	8	8	9	19	21	20	11	7	6	8	5	5	4	4	5	4	5	4	4	5	5	5
SEP	4	5	5	7	8	9	12	18	16	11	5	4	4	3	3	2	2	2	4	4	4	5	8	7
OCT	5	3	7	5	5	5	4	9	8	7	4	5	4	3	5	2	2	2	2	3	3	4	4	4
NOV	5	5	5	5	5	5	5	8	8	9	6	5	2	3	3	3	3	4	3	4	3	3	4	3
DEC	2	2	2	3	6	4	2	4	3	6	5	6	8	2	1	2	2	3	2	2	2	2	2	1
Number of intakes:			2	Length of the sampling period:						150	s	Unit:	0.01	µmol mol-1
month\time	0	1	2	3	4	5	6	7	8	9	10	11	12	13	14	15	16	17	18	19	20	21	22	23
JAN	3	2	2	6	6	2	5	4	4	6	5	4	5	2	2	2	2	3	2	2	2	3	2	2
FEB	1	1	1	1	1	1	2	1	3	2	3	2	2	2	2	1	1	1	1	1	2	1	1	1
MAR	2	1	2	2	3	2	2	3	3	3	2	3	2	2	2	1	1	2	1	1	2	1	1	2
APR	4	6	5	6	5	6	8	9	6	6	6	8	3	4	4	4	2	2	2	2	3	3	3	5
MAY	8	4	7	10	9	9	19	11	9	8	8	11	11	10	10	6	5	2	2	6	10	9	11	20
JUN	7	6	7	6	9	9	18	10	8	10	8	11	10	10	9	8	5	2	3	4	5	6	6	7
JUL	20	16	15	15	11	21	31	13	12	14	16	9	10	12	9	6	4	3	6	3	5	9	10	17
AUG	6	5	9	17	12	40	19	23	15	9	8	7	5	5	4	5	3	4	6	2	7	5	7	6
SEP	6	6	6	8	11	13	7	16	11	11	6	5	4	4	3	3	2	2	4	5	4	7	4	8
OCT	4	3	6	6	6	6	4	12	8	6	6	5	3	4	3	1	2	2	2	2	2	5	4	4
NOV	6	3	5	5	3	4	5	4	11	15	6	4	3	2	3	4	5	4	4	3	4	3	4	3
DEC	2	2	2	3	5	3	3	3	4	3	5	8	5	5	3	2	3	3	1	2	2	2	2	1
Number of intakes:			2	Length of the sampling period:						180	s	Unit:	0.01	µmol mol-1
month\time	0	1	2	3	4	5	6	7	8	9	10	11	12	13	14	15	16	17	18	19	20	21	22	23
JAN	4	1	4	5	8	2	5	4	3	3	6	4	3	2	2	2	2	2	2	2	2	2	2	2
FEB	1	1	1	1	1	1	2	2	3	5	2	2	1	2	2	1	1	1	2	1	2	1	1	1
MAR	2	1	1	2	3	2	1	4	4	3	3	2	2	2	2	1	1	1	2	1	2	2	2	2
APR	8	6	5	3	5	4	6	13	6	6	6	6	5	4	5	6	3	2	2	2	2	4	3	8
MAY	14	4	8	4	4	10	14	11	11	11	10	12	9	12	9	8	4	4	3	5	14	19	15	20
JUN	5	6	6	6	7	16	20	15	8	13	13	13	11	13	10	8	5	3	2	3	3	5	5	8
JUL	16	10	14	10	14	31	31	14	12	9	13	11	12	13	10	7	4	3	4	4	6	9	12	23
AUG	8	5	9	15	14	37	21	23	15	9	7	8	6	6	5	5	3	4	6	4	6	9	5	4
SEP	5	3	7	5	15	8	7	25	18	9	6	5	5	3	3	2	2	2	2	4	3	5	6	8
OCT	3	3	4	6	5	4	4	9	10	9	6	5	4	3	4	2	2	3	2	2	3	6	4	4
NOV	6	5	8	7	3	5	4	5	9	9	8	4	4	3	4	3	5	4	4	4	3	3	4	3
DEC	3	2	2	3	3	3	5	4	3	6	5	7	7	3	3	1	3	4	2	2	2	1	3	3
Number of intakes:			2	Length of the sampling period:						200	s	Unit:	0.01	µmol mol-1
month\time	0	1	2	3	4	5	6	7	8	9	10	11	12	13	14	15	16	17	18	19	20	21	22	23
JAN	4	2	2	5	4	1	4	4	3	4	5	4	3	3	3	2	2	3	3	2	1	2	2	2
FEB	1	1	1	1	1	2	2	2	5	4	2	2	2	2	2	1	1	1	2	2	2	1	1	2
MAR	1	1	2	3	2	1	2	4	3	3	3	3	2	2	2	2	1	1	2	2	2	1	2	1
APR	9	6	5	4	10	3	5	12	7	5	6	6	5	5	4	3	2	2	2	3	3	3	3	5
MAY	17	10	5	6	4	9	12	12	12	12	11	11	12	12	13	10	4	4	3	5	11	8	10	16
JUN	8	7	7	6	10	9	19	11	10	11	12	12	10	14	10	7	6	4	2	3	4	6	9	9
JUL	8	11	12	20	9	37	27	14	12	11	12	12	10	11	12	7	5	4	6	6	7	9	10	11
AUG	6	5	5	8	13	35	22	26	12	8	6	7	6	6	4	4	6	5	3	5	5	9	7	6
SEP	5	6	7	6	9	5	11	17	23	10	8	5	5	4	4	3	1	2	3	4	4	5	6	8
OCT	4	4	4	5	6	4	4	7	12	9	5	5	5	4	5	2	1	3	3	3	3	5	4	3
NOV	7	4	6	4	6	4	6	5	8	15	7	3	3	3	3	2	5	4	4	4	3	4	4	4
DEC	3	2	1	2	2	5	4	2	3	4	5	6	6	3	2	2	3	5	2	1	3	1	2	2
Number of intakes:			2	Length of the sampling period:						225	s	Unit:	0.01	µmol mol-1
month\time	0	1	2	3	4	5	6	7	8	9	10	11	12	13	14	15	16	17	18	19	20	21	22	23
JAN	4	3	3	3	7	3	7	4	3	8	7	4	5	3	2	2	2	2	2	2	1	1	2	3
FEB	1	1	1	1	1	2	2	2	3	6	2	2	3	2	1	1	1	1	2	1	2	1	1	1
MAR	2	2	1	4	2	2	2	4	4	3	3	2	2	2	2	2	1	2	2	2	2	2	1	2
APR	5	5	5	4	6	8	7	14	10	8	6	6	6	6	4	3	3	2	2	2	3	4	4	5
MAY	17	7	11	4	8	7	16	14	11	12	9	14	10	12	11	6	6	4	3	8	11	10	6	13
JUN	7	7	6	8	9	10	24	9	9	9	13	14	13	12	11	8	7	4	2	3	4	6	4	7
JUL	13	8	13	17	12	32	31	16	13	13	13	13	9	12	11	7	5	4	5	6	7	13	14	18
AUG	6	5	5	10	7	23	23	27	12	10	7	8	7	5	4	4	5	5	7	5	5	9	5	3
SEP	9	7	9	11	6	10	3	13	22	10	6	5	4	4	3	3	1	2	3	3	9	8	6	7
OCT	3	4	6	8	5	4	7	7	12	7	5	5	4	3	3	4	2	3	3	2	3	4	7	3
NOV	5	5	6	5	7	5	6	5	7	10	7	4	4	2	3	4	4	3	4	4	3	3	5	7
DEC	3	2	1	3	5	2	4	4	3	5	6	6	8	2	3	2	4	3	2	2	4	2	2	1
Number of intakes:			2	Length of the sampling period:						300	s	Unit:	0.01	µmol mol-1
month\time	0	1	2	3	4	5	6	7	8	9	10	11	12	13	14	15	16	17	18	19	20	21	22	23
JAN	3	4	3	5	4	2	6	5	3	5	7	5	6	2	4	3	3	3	3	2	2	2	2	3
FEB	1	1	1	1	1	2	2	2	3	6	3	2	2	2	1	1	1	1	1	1	2	1	1	1
MAR	2	1	2	2	3	2	2	3	4	3	4	3	2	2	2	2	2	1	2	1	2	2	1	2
APR	11	5	10	4	9	7	7	12	7	8	10	6	6	6	6	4	2	3	2	3	4	6	3	5
MAY	13	5	8	5	8	12	21	14	12	12	13	10	14	16	9	11	6	5	4	8	12	10	23	20
JUN	11	8	9	8	10	10	18	16	12	16	12	17	11	14	15	11	7	4	2	4	5	8	8	10
JUL	16	7	16	14	9	22	23	16	12	14	14	14	11	13	12	6	6	4	8	5	10	10	12	25
AUG	5	7	10	16	20	24	19	20	19	9	7	7	8	7	6	4	5	7	5	4	7	6	8	4
SEP	7	5	6	7	16	16	7	25	23	13	7	6	6	6	4	3	2	3	4	5	4	7	9	3
OCT	3	6	7	6	6	5	4	10	8	13	7	6	5	4	4	2	3	3	3	3	2	3	5	3
NOV	6	7	8	6	5	7	7	9	10	9	11	5	4	4	3	3	4	7	5	5	3	3	4	7
DEC	2	2	2	4	3	2	3	7	3	6	7	9	8	4	3	3	5	5	3	3	5	2	2	3
Number of intakes:			2	Length of the sampling period:						360	s	Unit:	0.01	µmol mol-1
month\time	0	1	2	3	4	5	6	7	8	9	10	11	12	13	14	15	16	17	18	19	20	21	22	23
JAN	4	3	3	5	9	2	6	4	4	5	9	4	4	4	3	3	3	3	3	2	1	2	2	3
FEB	1	1	1	1	1	3	3	3	6	6	3	2	2	3	2	2	2	1	1	2	2	1	1	1
MAR	2	2	2	2	3	2	3	4	4	3	4	3	3	2	2	2	1	2	2	2	3	2	1	3
APR	8	5	5	7	10	7	8	13	8	10	8	8	7	7	6	6	2	2	2	4	4	4	8	8
MAY	9	6	15	6	7	6	18	19	14	13	13	10	13	12	13	10	7	5	5	8	6	23	16	24
JUN	11	9	12	10	7	14	30	13	10	14	13	16	13	14	11	10	9	6	3	7	4	7	8	9
JUL	18	14	25	26	16	45	30	19	18	16	15	15	9	12	14	8	6	6	5	8	13	11	22	13
AUG	6	3	6	11	12	27	18	27	13	9	8	9	8	7	5	4	8	7	11	7	6	9	4	12
SEP	8	6	7	18	14	9	10	31	18	14	8	7	7	4	4	5	2	4	4	6	7	7	7	4
OCT	4	5	13	10	7	4	6	10	17	9	5	5	6	6	5	3	4	7	3	2	4	6	4	4
NOV	7	6	7	6	5	6	8	6	9	9	11	6	4	4	3	3	7	7	5	3	5	4	5	8
DEC	3	2	2	4	4	4	5	4	6	4	7	9	11	4	6	3	5	4	3	3	3	3	3	2
Number of intakes:			2	Length of the sampling period:						450	s	Unit:	0.01	µmol mol-1
month\time	0	1	2	3	4	5	6	7	8	9	10	11	12	13	14	15	16	17	18	19	20	21	22	23
JAN	4	4	4	6	7	5	7	5	5	7	6	6	4	4	2	4	3	2	2	2	2	2	2	3
FEB	1	1	1	2	2	3	4	2	7	5	3	4	4	3	2	2	2	2	1	2	2	2	2	1
MAR	2	2	2	2	3	2	3	5	4	5	6	4	3	2	3	2	2	2	3	2	2	3	3	3
APR	14	9	6	5	18	6	10	16	9	10	10	8	6	5	6	4	3	3	3	5	4	8	8	8
MAY	8	9	15	8	11	14	26	15	16	18	15	14	14	15	12	10	7	6	6	9	13	26	10	33
JUN	12	8	10	10	8	15	31	15	11	16	16	17	15	20	13	11	9	7	4	5	6	9	8	12
JUL	27	12	36	37	21	35	39	23	18	15	12	14	14	14	17	9	6	4	7	12	13	15	18	33
AUG	7	6	8	21	39	22	16	35	16	11	9	11	8	7	7	5	6	8	7	6	8	7	11	10
SEP	11	5	7	11	14	13	10	29	15	15	8	9	8	6	5	4	3	3	4	6	5	9	12	6
OCT	5	7	7	12	9	7	9	12	15	10	7	7	7	7	5	3	3	4	3	4	5	6	4	4
NOV	9	8	7	7	3	10	8	9	16	8	11	8	5	5	4	7	6	8	7	7	5	4	7	5
DEC	4	4	3	4	3	5	6	3	3	6	9	10	11	4	4	4	5	3	3	4	4	3	3	2
Number of intakes:			2	Length of the sampling period:						600	s	Unit:	0.01	µmol mol-1
month\time	0	1	2	3	4	5	6	7	8	9	10	11	12	13	14	15	16	17	18	19	20	21	22	23
JAN	4	6	3	7	8	4	3	11	7	9	11	6	4	4	5	4	3	3	2	3	3	4	4	5
FEB	1	2	1	2	2	5	3	3	4	5	3	3	3	4	4	2	2	2	3	3	2	2	2	2
MAR	3	2	3	2	4	4	3	4	4	5	4	4	4	3	4	3	2	3	3	3	4	3	4	3
APR	14	8	12	7	14	8	10	27	13	11	9	9	8	6	8	5	4	3	4	5	10	6	8	14
MAY	21	6	11	9	7	8	43	22	17	15	17	16	13	18	19	14	10	7	8	16	14	26	26	26
JUN	17	11	21	19	23	17	37	16	15	15	16	14	17	21	15	11	12	8	4	8	8	13	10	9
JUL	32	24	40	19	28	63	57	26	23	21	20	18	15	19	15	14	9	9	10	16	17	16	28	25
AUG	13	9	9	13	41	20	21	34	20	12	11	11	10	8	7	7	9	19	7	5	5	9	13	13
SEP	13	5	18	23	15	24	14	41	20	15	11	10	9	7	6	5	4	4	8	12	10	8	17	14
OCT	6	6	8	10	5	4	10	15	21	18	11	9	9	7	6	4	5	5	6	4	4	9	4	6
NOV	15	7	10	10	12	8	11	10	16	13	10	8	7	5	6	7	9	7	7	6	4	7	7	15
DEC	3	3	3	4	5	8	7	6	4	12	11	10	11	4	8	3	4	3	3	4	5	4	5	3
Number of intakes:			2	Length of the sampling period:						900	s	Unit:	0.01	µmol mol-1
month\time	0	1	2	3	4	5	6	7	8	9	10	11	12	13	14	15	16	17	18	19	20	21	22	23
JAN	7	5	5	14	19	6	18	9	7	14	13	8	7	8	5	8	11	7	4	3	3	3	5	6
FEB	2	2	3	3	3	4	4	8	11	9	5	5	6	7	5	3	4	4	4	5	5	3	3	2
MAR	5	4	2	3	4	5	6	7	7	6	6	5	6	6	4	5	4	3	4	5	5	5	3	7
APR	17	18	19	18	34	17	21	30	15	11	12	12	10	9	12	6	7	5	6	11	8	11	13	22
MAY	18	10	16	8	15	44	58	23	17	15	20	18	17	21	21	20	13	9	13	21	18	18	37	22
JUN	19	14	27	19	30	27	43	26	21	21	20	20	18	18	18	16	14	12	5	13	10	13	13	12
JUL	26	25	58	34	46	67	60	29	26	22	26	17	18	19	22	17	13	12	9	17	25	27	38	38
AUG	13	19	26	55	36	32	82	45	40	14	14	12	13	10	10	11	11	14	15	12	12	13	19	11
SEP	21	13	17	43	37	18	24	61	30	28	14	10	8	11	7	8	6	5	10	18	14	14	23	10
OCT	9	9	18	18	6	16	14	13	28	24	11	14	10	8	7	7	9	8	12	7	7	22	10	16
NOV	15	13	16	10	11	12	10	20	22	29	13	12	9	8	8	11	12	14	11	7	5	5	8	16
DEC	10	4	4	6	12	16	11	10	8	23	13	18	13	6	9	7	7	5	4	4	8	6	6	6
Number of intakes:			2	Length of the sampling period:						1800	s	Unit:	0.01	µmol mol-1
month\time	0	1	2	3	4	5	6	7	8	9	10	11	12	13	14	15	16	17	18	19	20	21	22	23
JAN	15	13	17	26	24	12	30	17	18	26	25	19	20	17	17	16	16	13	13	9	8	10	11	15
FEB	8	9	7	7	8	13	10	16	20	21	12	12	11	10	12	12	13	13	13	12	11	8	11	9
MAR	8	12	11	11	9	14	15	22	21	17	16	12	9	11	10	11	8	11	11	10	11	16	12	16
APR	55	55	31	28	54	50	46	64	37	24	27	14	13	17	17	13	11	16	15	20	19	21	40	37
MAY	56	29	35	35	31	54	159	76	61	46	35	27	25	32	25	26	26	19	28	34	34	52	30	44
JUN	33	33	64	53	53	70	104	75	37	32	33	25	32	35	25	24	36	26	15	29	32	30	22	25
JUL	88	81	106	95	99	136	127	104	70	37	33	26	20	23	27	25	22	18	31	42	47	38	53	70
AUG	34	31	42	162	74	114	170	146	87	41	34	25	24	17	15	23	26	38	31	22	22	32	31	45
SEP	47	50	44	81	79	57	59	100	92	51	36	28	16	17	15	13	15	15	17	28	33	31	47	33
OCT	14	20	33	30	27	27	31	51	79	52	25	26	25	13	22	13	21	24	19	18	22	28	30	18
NOV	30	41	41	27	33	30	24	23	39	72	42	21	20	19	19	25	25	29	27	23	18	18	23	21
DEC	17	14	14	15	21	25	23	17	20	20	30	35	34	18	16	18	24	21	12	11	15	14	14	18
Number of intakes:			3	Length of the sampling period:						100	s	Unit:	0.01	µmol mol-1
month\time	0	1	2	3	4	5	6	7	8	9	10	11	12	13	14	15	16	17	18	19	20	21	22	23
JAN	3	3	3	5	7	3	5	5	4	7	7	5	5	3	2	3	3	3	2	3	3	4	2	4
FEB	1	1	1	1	2	2	2	3	4	5	3	2	3	3	2	1	2	2	2	2	2	1	1	2
MAR	2	2	2	3	3	2	3	4	4	4	3	3	2	2	3	2	1	2	2	2	3	2	2	3
APR	6	7	7	7	11	8	11	12	8	7	9	9	7	6	6	4	3	3	3	4	4	5	6	8
MAY	11	4	7	10	13	8	31	14	12	11	14	14	13	11	14	10	7	4	4	8	13	19	22	22
JUN	10	8	10	8	10	13	36	14	11	14	14	16	13	13	12	11	7	4	3	5	6	9	7	9
JUL	26	14	16	18	13	36	33	20	15	14	17	13	16	14	13	9	6	5	7	6	8	13	15	17
AUG	7	9	9	21	13	36	28	26	19	12	9	10	7	7	6	5	5	6	7	3	8	10	10	8
SEP	10	6	11	10	17	16	8	22	16	12	8	5	5	5	5	4	2	3	4	5	6	9	8	10
OCT	5	5	8	6	8	8	7	14	12	8	8	6	5	5	5	2	3	4	4	3	4	6	6	5
NOV	7	7	6	8	7	6	6	6	12	16	7	7	4	4	3	4	5	6	6	5	5	4	5	4
DEC	4	3	3	3	4	4	3	4	5	4	5	10	7	5	4	3	2	4	3	2	3	3	2	3
Number of intakes:			3	Length of the sampling period:						120	s	Unit:	0.01	µmol mol-1
month\time	0	1	2	3	4	5	6	7	8	9	10	11	12	13	14	15	16	17	18	19	20	21	22	23
JAN	4	3	4	6	11	3	6	6	3	7	10	6	5	3	3	3	3	3	3	2	2	3	3	3
FEB	1	1	1	1	1	2	2	3	4	6	2	3	3	3	2	2	2	1	2	2	2	2	2	2
MAR	2	2	2	2	3	4	2	6	5	4	4	3	3	3	2	2	1	2	2	2	3	2	2	3
APR	10	8	7	6	11	8	11	16	10	9	8	9	6	6	6	5	3	3	3	5	4	4	5	8
MAY	14	7	12	10	8	21	23	17	15	14	13	16	13	13	14	11	6	4	4	6	11	18	12	19
JUN	10	9	11	9	12	16	25	16	10	14	14	15	14	15	14	10	7	4	4	5	5	8	8	10
JUL	18	18	22	20	22	36	50	21	16	11	17	16	15	14	14	10	6	5	5	6	9	16	18	24
AUG	6	10	9	17	14	16	33	32	18	11	11	10	7	8	7	6	6	6	8	7	8	16	6	6
SEP	9	7	12	12	20	10	9	28	18	13	7	7	5	4	5	3	2	3	4	4	6	8	9	8
OCT	6	5	6	8	6	6	7	14	12	9	6	7	6	4	4	3	2	5	4	3	5	7	6	4
NOV	8	8	7	8	6	7	5	7	12	17	8	6	5	4	4	4	7	5	4	5	5	4	4	5
DEC	3	3	3	3	3	4	7	4	5	7	8	7	9	4	4	2	4	4	2	3	3	2	3	3
Number of intakes:			3	Length of the sampling period:						150	s	Unit:	0.01	µmol mol-1
month\time	0	1	2	3	4	5	6	7	8	9	10	11	12	13	14	15	16	17	18	19	20	21	22	23
JAN	5	4	5	5	6	3	8	6	4	8	8	5	7	3	3	3	3	3	3	2	2	2	3	3
FEB	1	1	1	1	2	3	2	3	5	6	2	3	2	2	2	1	2	2	2	2	2	1	2	2
MAR	2	2	2	3	2	3	3	4	6	4	4	3	3	3	2	2	1	2	2	2	2	3	2	3
APR	7	5	6	6	10	9	9	18	11	11	9	9	8	6	6	4	3	3	2	3	4	5	4	8
MAY	16	7	11	10	8	13	25	19	16	14	14	17	13	18	17	10	8	5	4	11	17	12	15	26
JUN	10	11	9	10	13	14	24	15	12	13	15	19	15	14	16	12	9	5	3	4	5	10	9	11
JUL	23	13	18	23	19	46	44	19	15	15	16	18	16	14	15	9	6	4	7	7	9	13	17	21
AUG	8	9	8	15	14	39	27	28	19	15	9	9	7	8	6	6	7	6	10	6	5	11	8	8
SEP	8	7	10	10	12	14	9	19	25	13	8	8	5	5	5	4	2	4	5	5	9	9	8	6
OCT	5	5	9	9	8	6	9	12	14	12	6	7	5	5	5	4	3	4	3	3	4	5	7	6
NOV	5	7	7	7	7	7	9	7	10	14	13	6	5	4	4	5	5	5	5	5	4	3	6	6
DEC	3	3	2	4	6	5	6	4	5	8	8	10	9	4	3	3	6	5	3	3	4	3	3	2
Number of intakes:			3	Length of the sampling period:						200	s	Unit:	0.01	µmol mol-1
month\time	0	1	2	3	4	5	6	7	8	9	10	11	12	13	14	15	16	17	18	19	20	21	22	23
JAN	4	4	4	8	6	3	7	7	5	6	9	6	7	4	3	4	4	4	3	2	2	3	3	4
FEB	1	1	1	1	2	3	2	3	6	8	4	3	4	3	2	2	2	2	2	2	2	2	1	2
MAR	2	2	3	5	3	2	3	5	4	5	5	3	3	3	4	2	2	2	2	2	3	2	2	2
APR	9	7	11	8	13	8	12	17	9	11	10	9	8	7	6	5	3	3	3	4	5	6	5	9
MAY	13	10	12	8	11	14	28	18	17	13	16	14	17	15	15	13	6	5	4	10	19	12	32	17
JUN	9	9	10	11	9	16	42	18	13	18	16	19	17	17	17	12	11	5	4	5	6	7	10	10
JUL	14	13	22	16	13	39	40	22	17	19	17	17	14	17	15	9	7	5	10	9	13	14	26	29
AUG	6	6	13	14	13	28	26	35	26	12	10	11	9	9	8	6	8	9	6	6	9	10	7	7
SEP	11	9	8	10	14	15	10	28	25	21	9	8	8	7	4	4	3	4	6	7	8	7	8	6
OCT	5	7	10	9	8	7	6	15	17	14	9	9	7	6	5	3	3	5	6	4	4	5	10	5
NOV	7	8	9	7	7	8	9	10	11	15	13	7	5	4	5	4	9	7	7	6	5	4	6	7
DEC	4	2	3	5	7	4	5	6	4	6	8	11	11	7	5	2	7	6	3	4	4	2	3	3
Number of intakes:			3	Length of the sampling period:						240	s	Unit:	0.01	µmol mol-1
month\time	0	1	2	3	4	5	6	7	8	9	10	11	12	13	14	15	16	17	18	19	20	21	22	23
JAN	4	3	6	6	8	3	7	7	5	10	11	7	5	4	4	3	3	3	3	3	2	3	3	4
FEB	1	1	1	2	2	3	4	4	6	8	4	4	3	5	3	2	2	2	2	2	2	1	1	2
MAR	3	3	2	3	3	3	4	5	6	5	5	5	3	3	4	3	2	2	3	2	3	2	3	3
APR	9	8	8	8	10	7	11	18	13	13	11	10	9	9	7	5	3	4	3	5	5	6	8	8
MAY	21	6	19	8	9	14	21	21	18	17	21	17	15	16	20	13	8	7	5	9	14	25	18	24
JUN	12	9	11	14	10	17	28	20	13	20	16	19	20	20	15	15	11	6	3	8	6	7	12	12
JUL	22	19	31	37	30	58	66	23	20	18	18	22	17	16	18	11	8	6	10	11	15	13	29	23
AUG	9	6	11	20	20	25	37	41	22	13	11	11	10	10	7	8	9	12	13	7	14	9	11	11
SEP	9	11	13	17	12	30	8	35	26	16	14	8	8	6	5	6	3	4	5	8	8	9	12	8
OCT	6	5	12	9	9	8	9	12	20	12	8	8	8	7	5	3	4	6	4	4	6	6	5	6
NOV	10	7	10	10	6	8	9	11	12	14	10	8	6	6	6	5	8	8	7	5	6	5	7	9
DEC	3	4	3	6	4	6	8	6	6	5	8	15	14	6	7	3	5	8	4	4	4	3	4	4
Number of intakes:			3	Length of the sampling period:						300	s	Unit:	0.01	µmol mol-1
month\time	0	1	2	3	4	5	6	7	8	9	10	11	12	13	14	15	16	17	18	19	20	21	22	23
JAN	5	4	5	9	9	4	9	7	6	10	11	7	8	5	5	4	4	4	3	3	4	3	3	4
FEB	1	2	1	2	2	3	4	3	8	9	3	5	3	4	2	2	2	3	2	2	3	2	2	2
MAR	3	3	3	3	4	2	5	6	5	6	6	6	4	3	4	3	2	3	3	3	4	3	3	3
APR	17	11	7	6	21	10	16	21	14	12	13	10	9	8	7	6	4	4	4	6	6	8	8	10
MAY	13	8	17	10	12	18	31	23	19	23	20	19	20	19	19	13	8	8	9	8	22	25	24	36
JUN	14	12	16	14	13	20	32	18	14	21	18	20	16	23	19	16	12	8	5	10	5	10	11	13
JUL	28	17	37	38	33	52	57	28	25	23	23	24	15	21	19	12	9	7	9	14	17	16	20	39
AUG	10	8	17	25	36	27	35	49	22	14	13	14	10	11	9	8	9	12	9	8	10	9	13	11
SEP	13	9	9	20	19	18	15	45	31	17	15	12	8	6	7	6	4	4	7	9	12	11	13	13
OCT	5	7	8	10	10	8	8	14	16	13	12	8	9	9	7	4	4	4	5	4	5	10	9	5
NOV	9	11	13	9	9	11	12	11	19	14	14	9	6	6	5	7	8	9	8	9	7	7	7	7
DEC	5	4	3	4	7	6	7	5	5	7	11	16	13	5	7	4	7	4	4	4	6	3	4	3
Number of intakes:			3	Length of the sampling period:						400	s	Unit:	0.01	µmol mol-1
month\time	0	1	2	3	4	5	6	7	8	9	10	11	12	13	14	15	16	17	18	19	20	21	22	23
JAN	6	7	4	12	18	5	9	10	8	9	15	10	6	6	5	5	4	5	4	3	3	5	4	6
FEB	2	2	2	2	2	5	5	4	9	7	4	5	4	5	4	3	3	3	4	3	3	2	3	2
MAR	3	3	3	5	4	4	4	7	7	7	6	5	5	4	5	3	3	3	4	4	5	4	5	3
APR	17	20	19	11	24	9	16	30	15	14	13	11	10	9	10	6	5	5	6	8	10	10	13	13
MAY	22	7	13	10	11	15	48	26	23	19	21	20	18	23	23	17	14	9	10	20	16	35	34	26
JUN	18	15	20	18	24	25	46	24	19	22	20	20	24	26	21	17	13	10	6	10	10	14	12	14
JUL	40	26	50	30	30	68	80	36	25	27	24	19	20	20	20	16	12	8	11	21	20	20	33	38
AUG	15	10	10	30	37	30	37	34	29	16	15	15	12	11	10	10	12	18	11	8	8	12	15	15
SEP	12	7	21	27	32	32	21	36	30	25	15	13	11	9	9	7	5	5	10	13	13	10	18	13
OCT	8	5	19	15	10	10	13	18	23	25	14	12	11	9	9	5	6	7	8	5	6	8	8	8
NOV	19	10	11	12	14	11	13	12	18	15	16	10	8	8	7	9	11	11	9	11	6	7	10	14
DEC	5	5	3	4	10	9	10	8	4	11	12	13	22	6	7	7	8	5	5	5	6	5	5	4
Number of intakes:			3	Length of the sampling period:						600	s	Unit:	0.01	µmol mol-1
month\time	0	1	2	3	4	5	6	7	8	9	10	11	12	13	14	15	16	17	18	19	20	21	22	23
JAN	8	6	9	19	20	7	22	16	10	18	19	14	11	9	7	8	10	7	6	6	4	4	6	8
FEB	2	3	4	4	4	5	7	7	13	8	6	5	6	9	6	5	6	6	5	5	6	4	3	3
MAR	6	5	5	5	6	5	7	8	9	7	8	7	6	6	6	6	4	5	5	4	8	5	5	8
APR	23	23	21	21	29	22	21	37	21	14	15	16	12	11	13	8	6	7	7	11	12	11	17	25
MAY	35	12	15	11	17	32	70	27	22	23	23	22	23	23	26	25	18	14	14	24	34	39	29	35
JUN	21	25	27	22	35	33	58	37	26	26	24	23	27	28	24	22	18	14	7	14	13	16	28	22
JUL	36	42	70	35	45	80	75	42	39	28	30	30	21	23	24	19	17	15	18	22	38	32	51	70
AUG	15	24	27	61	35	41	71	55	39	21	19	14	14	14	14	14	16	22	15	13	16	17	26	19
SEP	28	24	22	43	40	31	21	73	54	38	20	14	14	12	12	9	8	7	13	23	15	16	25	16
OCT	12	11	22	23	9	15	12	29	33	36	16	18	14	10	11	7	9	11	12	8	9	22	14	16
NOV	21	15	18	16	17	21	19	20	25	32	18	13	10	11	10	13	15	17	13	12	8	8	11	16
DEC	12	8	6	9	11	16	13	10	8	21	16	25	19	9	12	9	9	8	8	7	10	8	6	8
Number of intakes:			3	Length of the sampling period:						1200	s	Unit:	0.01	µmol mol-1
month\time	0	1	2	3	4	5	6	7	8	9	10	11	12	13	14	15	16	17	18	19	20	21	22	23
JAN	17	14	18	36	24	18	32	24	20	33	28	29	27	17	20	21	21	13	16	10	9	12	12	15
FEB	8	8	10	10	9	15	11	20	24	24	16	13	14	15	14	13	15	13	13	16	12	11	12	10
MAR	11	12	13	13	12	16	16	27	25	23	18	13	11	13	13	13	9	12	14	13	15	17	13	14
APR	52	50	37	33	84	45	66	70	45	28	30	20	18	19	22	15	14	17	19	27	23	24	40	61
MAY	50	29	31	38	37	58	193	82	68	50	39	32	32	35	33	41	29	26	31	49	35	55	44	46
JUN	44	33	56	50	72	66	97	78	42	42	39	32	36	43	36	31	36	28	18	31	31	42	32	36
JUL	96	108	135	107	94	144	143	134	74	48	35	36	26	32	36	29	28	26	35	46	68	66	77	98
AUG	47	40	47	128	116	100	170	149	81	47	38	30	28	22	20	24	31	59	36	24	31	36	40	39
SEP	61	45	57	82	72	103	64	109	99	68	45	31	23	22	16	14	19	16	25	32	31	38	51	40
OCT	17	22	37	41	31	29	36	56	80	52	33	28	24	17	22	14	23	26	25	17	21	30	39	22
NOV	48	39	43	30	45	35	22	34	47	77	49	25	21	24	22	26	32	33	26	26	23	21	25	26
DEC	28	15	17	22	20	24	26	21	16	23	35	36	43	22	20	21	28	25	14	13	17	19	18	18
Number of intakes:			4	Length of the sampling period:						100	s	Unit:	0.01	µmol mol-1
month\time	0	1	2	3	4	5	6	7	8	9	10	11	12	13	14	15	16	17	18	19	20	21	22	23
JAN	5	3	4	8	9	4	6	6	5	8	11	6	5	4	3	3	3	5	4	3	3	4	3	4
FEB	2	2	1	2	1	3	3	4	6	5	3	3	3	3	2	2	2	2	3	2	3	2	2	2
MAR	3	3	3	4	3	4	5	5	4	5	5	4	3	3	3	2	2	2	3	3	3	3	2	3
APR	11	9	9	8	11	9	13	16	11	9	11	10	8	7	7	5	3	3	3	6	5	6	6	8
MAY	25	12	12	16	8	20	26	15	17	15	17	17	17	20	17	12	8	6	4	8	14	18	16	13
JUN	12	10	11	11	15	20	29	20	13	17	20	17	17	21	14	12	9	5	3	6	7	11	13	11
JUL	26	21	28	30	15	54	50	22	18	17	19	20	22	19	19	10	8	5	7	8	11	18	24	24
AUG	10	8	13	16	15	33	32	33	21	12	10	12	9	9	8	7	9	8	9	6	9	11	10	8
SEP	7	10	10	12	13	14	14	32	28	13	9	7	7	6	5	4	2	4	5	8	9	8	7	13
OCT	6	6	8	8	9	7	8	14	16	12	7	7	8	6	7	3	3	4	5	5	5	6	7	6
NOV	8	9	11	7	9	9	8	9	15	19	12	7	5	5	5	5	8	7	5	7	5	6	7	6
DEC	4	3	3	4	6	5	5	7	4	8	7	10	10	4	5	3	5	5	3	3	6	4	3	4
Number of intakes:			4	Length of the sampling period:						150	s	Unit:	0.01	µmol mol-1
month\time	0	1	2	3	4	5	6	7	8	9	10	11	12	13	14	15	16	17	18	19	20	21	22	23
JAN	5	5	4	8	9	4	9	8	6	9	10	8	8	4	4	4	4	5	4	3	3	4	3	5
FEB	2	2	1	2	2	3	3	4	7	8	4	3	3	3	3	2	2	2	2	2	3	2	2	2
MAR	3	3	3	5	4	3	3	6	6	5	6	4	3	3	4	2	2	3	2	2	3	2	2	3
APR	13	8	13	8	17	11	15	16	11	12	12	11	8	9	8	6	4	4	3	5	6	7	6	10
MAY	15	8	14	14	13	18	29	21	19	15	19	19	19	19	15	14	8	5	6	10	18	17	34	26
JUN	15	9	15	12	14	18	40	23	17	21	20	22	19	20	20	15	11	6	5	7	7	11	13	11
JUL	27	20	25	25	14	45	44	27	21	22	22	20	19	20	17	11	8	6	10	8	16	14	28	32
AUG	9	12	13	27	22	33	30	41	28	15	11	12	10	10	9	8	8	9	10	7	10	11	11	7
SEP	9	9	9	12	18	23	12	35	29	23	11	9	8	8	6	5	3	4	7	9	8	12	10	10
OCT	7	7	11	11	9	9	7	19	17	14	10	10	7	7	6	3	4	6	6	4	6	7	10	6
NOV	11	10	11	8	8	9	10	11	15	19	14	7	6	5	6	5	9	7	9	6	6	5	7	7
DEC	4	3	3	5	7	6	5	7	6	7	10	15	13	7	6	4	7	6	3	5	6	3	3	4
Number of intakes:			4	Length of the sampling period:						180	s	Unit:	0.01	µmol mol-1
month\time	0	1	2	3	4	5	6	7	8	9	10	11	12	13	14	15	16	17	18	19	20	21	22	23
JAN	6	4	5	8	13	3	8	7	6	9	11	6	5	5	4	4	4	4	3	3	3	3	3	4
FEB	1	2	1	2	2	3	4	4	7	8	4	4	4	4	3	2	2	2	2	3	3	2	2	2
MAR	3	3	3	3	4	4	3	6	6	6	7	5	4	3	4	3	2	2	3	2	4	3	3	3
APR	13	9	9	10	14	9	12	22	13	14	13	11	11	9	8	7	4	4	4	6	5	8	10	11
MAY	20	7	18	9	9	17	32	24	23	18	21	20	19	20	19	16	10	8	7	11	17	29	25	30
JUN	11	10	16	14	13	24	34	25	15	23	21	24	22	22	17	15	12	7	4	8	7	9	12	13
JUL	25	21	31	30	29	62	64	28	23	21	23	24	21	20	19	13	8	7	8	11	15	15	30	33
AUG	12	11	13	22	21	30	37	44	25	16	13	13	12	11	9	8	8	10	12	8	11	14	12	14
SEP	11	9	15	18	22	32	14	37	28	20	15	10	9	6	6	6	3	5	6	10	10	10	14	10
OCT	6	7	15	12	11	7	8	13	22	15	10	10	8	8	7	5	4	7	6	5	7	9	6	7
NOV	11	10	13	11	9	8	11	12	16	14	14	10	6	6	7	5	9	9	7	7	7	7	9	9
DEC	5	3	4	7	6	7	8	7	8	8	10	15	16	5	7	3	7	7	4	4	4	4	5	5
Number of intakes:			4	Length of the sampling period:						225	s	Unit:	0.01	µmol mol-1
month\time	0	1	2	3	4	5	6	7	8	9	10	11	12	13	14	15	16	17	18	19	20	21	22	23
JAN	6	6	6	9	11	5	11	9	7	13	11	8	9	5	4	5	5	4	4	4	4	3	4	5
FEB	2	2	1	2	2	4	5	4	8	9	4	5	5	4	3	3	3	3	2	2	3	2	2	2
MAR	3	3	4	4	4	3	4	7	6	7	7	6	4	4	4	3	2	3	4	4	4	4	3	4
APR	17	10	8	8	24	11	17	25	16	14	12	11	12	10	8	6	5	4	5	6	7	9	9	12
MAY	20	12	18	11	14	16	42	26	20	23	24	23	23	24	21	16	11	8	10	13	28	40	18	34
JUN	17	13	15	17	15	21	38	23	17	23	23	24	21	25	21	19	12	9	5	10	7	12	11	15
JUL	33	16	38	36	30	54	62	31	26	27	25	25	18	22	24	12	11	7	8	15	18	22	25	37
AUG	9	10	16	27	40	29	40	50	28	18	16	16	12	11	10	9	9	12	11	9	12	12	15	13
SEP	17	11	12	22	22	19	13	49	39	19	16	11	10	8	7	6	5	5	8	9	13	14	12	13
OCT	7	8	12	15	12	9	12	18	22	15	12	10	10	9	8	5	5	5	6	6	6	11	9	6
NOV	12	12	14	9	11	13	14	11	21	16	13	10	8	7	6	8	9	10	8	11	7	7	9	9
DEC	6	5	4	5	7	6	8	6	6	9	12	17	15	6	8	5	7	4	4	4	6	4	5	3
Number of intakes:			4	Length of the sampling period:						300	s	Unit:	0.01	µmol mol-1
month\time	0	1	2	3	4	5	6	7	8	9	10	11	12	13	14	15	16	17	18	19	20	21	22	23
JAN	7	8	4	14	20	6	12	12	8	13	16	11	10	7	6	6	5	4	4	4	4	5	5	6
FEB	2	2	1	2	3	6	5	4	9	9	5	5	5	6	4	3	3	3	4	4	4	3	3	3
MAR	4	3	4	4	6	5	5	7	7	8	7	7	5	5	5	4	3	4	4	4	6	4	5	4
APR	18	21	21	10	22	13	17	31	19	16	15	14	12	10	11	8	5	5	6	9	13	12	13	15
MAY	29	10	18	11	14	21	50	29	22	23	24	21	21	25	25	20	14	10	10	19	22	32	31	31
JUN	19	17	23	21	27	27	44	28	23	27	26	27	25	31	24	20	16	11	6	11	10	14	13	16
JUL	41	28	55	31	35	71	76	42	29	30	28	25	23	23	24	17	13	11	13	23	23	23	40	38
AUG	15	13	14	36	51	33	48	42	34	18	16	17	14	13	11	11	11	21	14	10	10	13	18	18
SEP	18	9	19	27	38	32	22	46	38	24	16	14	14	10	11	7	5	6	10	13	13	13	22	16
OCT	10	9	24	18	11	11	12	20	24	21	15	13	12	9	10	5	6	8	9	7	8	10	8	9
NOV	20	13	15	13	16	13	14	15	20	21	18	12	9	8	8	10	12	13	9	13	6	8	11	18
DEC	6	5	4	6	10	10	9	10	6	14	15	20	27	6	8	7	10	7	5	5	7	4	6	4
Number of intakes:			4	Length of the sampling period:						450	s	Unit:	0.01	µmol mol-1
month\time	0	1	2	3	4	5	6	7	8	9	10	11	12	13	14	15	16	17	18	19	20	21	22	23
JAN	10	7	9	21	21	8	22	15	12	21	22	15	12	10	7	9	11	8	6	7	5	5	7	9
FEB	3	3	4	4	4	6	8	8	16	11	7	7	8	9	6	5	5	6	5	5	7	4	4	3
MAR	7	6	5	5	6	6	8	10	10	9	10	8	7	6	6	7	4	5	7	6	8	7	6	9
APR	27	24	22	24	37	18	23	39	20	16	19	17	13	13	16	9	8	7	8	13	13	14	20	28
MAY	34	17	21	13	23	45	79	35	27	28	29	25	28	28	29	28	21	14	16	23	31	37	40	45
JUN	24	24	33	25	36	32	63	43	29	29	30	29	31	33	26	23	21	15	8	17	13	17	31	24
JUL	46	40	78	49	53	87	88	48	40	33	32	30	28	26	31	20	19	15	18	24	40	32	57	77
AUG	16	24	27	63	51	49	78	63	45	22	21	19	17	15	15	16	18	21	18	14	17	21	26	20
SEP	29	27	23	49	49	37	29	71	53	39	19	16	15	13	13	10	8	8	14	24	20	18	30	14
OCT	12	12	24	25	13	19	16	33	33	39	19	18	16	11	11	8	11	12	14	9	11	24	13	17
NOV	22	19	19	20	18	23	21	25	29	33	21	15	12	12	10	15	17	19	15	15	9	8	13	17
DEC	12	9	7	11	12	17	13	12	10	24	18	23	21	10	11	10	9	8	9	8	11	9	7	8
Number of intakes:			4	Length of the sampling period:						900	s	Unit:	0.01	µmol mol-1
month\time	0	1	2	3	4	5	6	7	8	9	10	11	12	13	14	15	16	17	18	19	20	21	22	23
JAN	17	16	19	35	31	17	30	26	24	36	28	28	24	19	20	23	22	15	15	10	9	14	14	16
FEB	8	9	9	10	9	16	13	24	24	27	16	14	15	16	15	14	15	13	14	17	13	11	13	11
MAR	11	12	13	13	12	18	17	29	26	23	17	15	13	14	14	14	10	12	13	14	16	18	14	17
APR	60	54	42	36	100	48	70	76	46	31	31	22	20	20	22	16	15	18	18	29	24	27	45	57
MAY	58	33	41	38	42	59	193	88	72	55	46	38	35	39	38	42	31	26	32	49	38	68	43	54
JUN	46	35	68	51	70	75	131	81	48	47	43	35	41	43	36	32	40	29	18	31	33	42	30	36
JUL	111	106	128	109	121	174	169	131	78	51	45	38	30	36	41	34	31	28	35	49	65	66	77	104
AUG	48	39	57	153	129	118	188	167	98	49	37	31	30	23	21	28	33	55	38	26	30	43	44	47
SEP	71	48	57	88	99	104	68	126	100	70	47	34	23	22	17	16	21	18	27	38	35	37	57	37
OCT	21	23	38	40	33	32	37	54	83	64	33	32	28	18	25	17	24	30	23	20	22	37	41	26
NOV	49	44	46	31	46	36	26	37	50	81	48	28	23	23	22	27	34	34	30	26	22	23	28	32
DEC	28	15	17	24	22	31	24	20	18	29	37	39	45	20	21	21	27	26	14	14	19	18	19	19
Number of intakes:			5	Length of the sampling period:						120	s	Unit:	0.01	µmol mol-1
month\time	0	1	2	3	4	5	6	7	8	9	10	11	12	13	14	15	16	17	18	19	20	21	22	23
JAN	6	5	5	9	9	4	9	9	7	9	12	9	8	5	4	5	4	5	5	4	4	4	3	5
FEB	2	2	1	2	2	3	4	4	7	9	4	4	4	4	3	2	2	2	3	2	3	2	2	2
MAR	4	3	3	5	4	4	3	8	6	6	6	5	4	4	4	3	3	3	3	3	4	3	2	3
APR	14	12	13	8	18	12	14	19	12	14	15	11	10	9	9	7	4	5	5	6	6	8	7	12
MAY	16	13	13	12	15	20	36	23	22	19	21	20	20	21	20	15	11	7	7	13	16	26	31	20
JUN	16	12	16	12	17	21	40	22	18	24	22	24	23	24	23	16	12	6	5	7	8	12	14	14
JUL	34	24	27	22	20	51	56	29	23	24	24	22	20	20	20	13	9	7	11	10	14	18	36	34
AUG	12	13	13	21	26	29	36	45	30	17	12	13	12	10	9	9	10	11	10	8	9	16	11	10
SEP	13	13	13	15	17	23	14	36	30	25	12	10	9	8	7	6	4	5	6	10	12	11	13	9
OCT	8	9	12	12	8	10	8	19	18	17	12	10	9	7	7	4	4	5	7	4	6	8	12	7
NOV	12	10	12	10	10	9	11	11	16	22	14	8	6	5	6	6	10	9	8	9	7	5	7	8
DEC	5	3	3	6	8	6	6	7	6	8	12	15	14	6	6	4	8	7	3	5	6	4	4	3
Number of intakes:			5	Length of the sampling period:						180	s	Unit:	0.01	µmol mol-1
month\time	0	1	2	3	4	5	6	7	8	9	10	11	12	13	14	15	16	17	18	19	20	21	22	23
JAN	7	5	6	11	11	6	11	10	8	11	14	8	8	6	5	5	4	4	5	4	4	4	4	5
FEB	2	2	2	3	3	5	5	4	9	9	4	5	4	4	3	3	3	4	2	2	3	2	2	3
MAR	3	3	3	4	5	4	5	8	8	7	9	7	4	4	5	4	2	3	4	4	5	4	4	5
APR	19	13	12	8	27	11	19	28	16	16	16	13	12	11	9	7	6	5	6	7	7	10	10	14
MAY	17	12	19	16	15	20	46	28	24	25	26	24	25	26	24	18	12	9	10	14	28	37	25	41
JUN	21	14	17	17	17	27	47	27	19	25	25	26	23	27	23	21	14	10	6	11	8	12	14	18
JUL	38	23	42	44	38	70	67	34	30	27	26	27	22	26	24	15	10	8	9	15	18	22	28	44
AUG	10	16	21	26	41	35	47	50	29	18	17	17	12	13	12	10	10	14	13	10	12	15	15	14
SEP	15	11	16	18	26	24	15	45	38	23	15	14	10	9	8	7	5	5	8	10	13	14	13	14
OCT	8	9	13	16	12	11	12	21	21	17	13	12	10	10	9	5	5	7	7	6	7	12	10	8
NOV	14	13	16	11	12	14	16	13	22	22	17	13	8	7	7	9	10	12	9	12	9	7	9	10
DEC	6	5	4	6	7	8	8	7	5	10	13	16	17	6	9	6	9	7	4	5	6	5	5	4
Number of intakes:			5	Length of the sampling period:						240	s	Unit:	0.01	µmol mol-1
month\time	0	1	2	3	4	5	6	7	8	9	10	11	12	13	14	15	16	17	18	19	20	21	22	23
JAN	7	8	4	13	20	7	9	13	9	13	18	11	9	7	6	6	5	5	4	4	4	6	5	6
FEB	2	3	2	3	3	6	5	5	10	9	5	6	5	7	5	4	4	3	4	3	4	3	3	3
MAR	4	4	4	4	5	6	5	9	8	8	8	7	6	5	5	4	3	4	5	4	6	5	5	4
APR	22	19	22	12	28	14	19	35	19	17	18	15	14	12	12	8	6	5	7	10	14	13	14	15
MAY	30	14	24	16	13	20	54	30	26	24	27	26	23	29	28	21	15	11	11	20	21	39	40	38
JUN	23	18	22	22	31	25	48	31	24	30	27	29	28	32	26	22	17	11	6	11	11	16	16	18
JUL	49	30	55	42	36	83	91	45	32	31	30	26	29	26	27	20	14	10	13	22	25	24	48	46
AUG	14	13	12	38	50	36	51	52	37	20	18	19	15	14	12	12	14	21	17	12	11	16	18	19
SEP	19	12	23	28	36	33	20	48	41	31	17	16	14	11	11	8	6	6	10	14	17	14	21	18
OCT	12	11	25	18	11	12	14	23	29	26	17	14	14	10	10	6	7	10	10	7	8	10	11	9
NOV	21	13	14	13	18	13	14	15	19	24	19	12	10	9	9	10	15	13	10	15	8	9	12	17
DEC	6	5	4	6	12	12	10	10	7	14	16	20	28	8	10	8	9	7	6	6	8	5	6	5
Number of intakes:			5	Length of the sampling period:						360	s	Unit:	0.01	µmol mol-1
month\time	0	1	2	3	4	5	6	7	8	9	10	11	12	13	14	15	16	17	18	19	20	21	22	23
JAN	10	8	10	23	22	8	25	19	12	22	25	16	14	11	8	9	12	8	6	7	5	5	8	9
FEB	3	3	4	4	5	6	7	9	15	12	7	8	7	10	6	5	6	6	6	6	6	4	4	3
MAR	7	6	5	7	7	7	8	11	11	9	9	8	7	7	7	7	4	5	7	6	8	7	5	10
APR	27	28	26	24	46	21	26	46	23	17	20	19	15	14	16	11	7	8	9	12	14	15	21	31
MAY	36	19	20	13	22	46	80	36	28	28	37	29	31	34	32	31	20	15	18	29	33	51	44	42
JUN	30	24	33	27	44	34	70	43	33	30	33	34	35	37	30	28	22	16	8	19	14	18	29	28
JUL	49	43	76	52	55	94	99	49	42	36	38	34	30	30	31	22	20	16	17	25	40	38	62	73
AUG	18	27	28	82	45	46	83	62	47	23	24	22	18	18	17	17	21	22	20	17	20	24	30	21
SEP	30	23	26	50	51	43	28	77	55	36	22	18	17	14	13	11	8	8	14	23	22	19	29	16
OCT	12	14	26	24	15	19	15	32	36	39	19	19	16	12	12	8	12	11	14	9	11	24	18	18
NOV	23	19	21	20	21	25	22	24	31	34	24	18	13	13	10	16	18	20	16	16	10	9	13	19
DEC	13	9	7	10	12	19	16	11	10	24	22	25	25	10	14	10	10	10	9	8	12	9	8	9
Number of intakes:			5	Length of the sampling period:						720	s	Unit:	0.01	µmol mol-1
month\time	0	1	2	3	4	5	6	7	8	9	10	11	12	13	14	15	16	17	18	19	20	21	22	23
JAN	18	17	21	38	34	18	34	29	26	38	33	32	26	20	22	23	23	15	16	12	9	15	14	19
FEB	8	9	10	10	10	16	14	24	25	26	16	15	15	16	16	14	16	14	14	17	13	11	13	11
MAR	12	13	13	14	13	17	18	28	26	24	19	15	13	14	14	14	10	12	14	14	17	18	15	18
APR	63	55	48	41	105	51	69	86	50	32	32	25	22	22	23	18	16	20	20	28	25	28	45	59
MAY	58	37	36	42	44	58	201	92	72	56	50	39	38	42	42	45	33	28	33	53	46	68	51	51
JUN	46	39	67	58	74	77	131	86	49	49	47	37	43	51	42	37	41	30	20	32	35	45	35	42
JUL	114	107	143	115	119	158	170	135	85	55	45	42	35	38	41	36	33	31	38	49	75	71	90	121
AUG	50	39	55	158	124	118	194	168	102	51	41	35	30	25	24	28	35	60	43	28	31	42	46	51
SEP	72	49	62	92	102	107	69	132	114	72	48	38	26	22	20	17	21	19	28	40	36	38	58	44
OCT	22	23	43	44	36	32	39	61	89	67	35	34	28	18	26	16	24	31	26	20	23	39	43	26
NOV	51	47	48	35	49	39	29	37	54	83	53	30	25	25	23	29	35	40	31	30	24	23	29	34
DEC	29	16	19	23	23	33	28	22	20	24	37	36	48	22	22	22	28	28	16	16	21	20	20	20

## Sheet: FigS8
SPLINE INTERPOLATION - 90-PERCENTILE OF ABSOLUTE DEVIATIONS
Number of intakes:			2	Length of the sampling period:						100	s	Unit:	0.01	µmol mol-1
month\time	0	1	2	3	4	5	6	7	8	9	10	11	12	13	14	15	16	17	18	19	20	21	22	23		Legend
JAN	4	5	5	8	11	5	10	13	12	12	16	12	5	4	3	4	4	7	7	5	3	6	4	3
FEB	2	3	2	2	2	3	3	4	10	8	4	4	4	5	2	3	2	3	5	2	3	2	1	2			<50
MAR	4	4	3	4	5	4	4	8	9	5	6	4	3	4	3	3	2	3	4	3	3	3	4	4			50-100
APR	8	14	11	21	13	8	25	18	14	12	14	11	13	10	8	6	6	4	5	7	5	9	9	11			100-150
MAY	17	9	16	14	11	21	40	18	17	15	23	16	18	19	18	13	10	6	5	10	9	19	32	10			150-200
JUN	12	14	15	13	15	37	57	22	15	20	24	22	24	25	19	15	11	5	4	7	9	19	14	11			200-300
JUL	32	47	43	31	22	83	64	26	20	22	23	23	24	21	19	12	12	4	6	7	11	35	30	32			300-400
AUG	16	14	15	26	19	35	60	34	26	14	11	15	12	11	9	9	10	10	16	7	7	16	10	11			400-500
SEP	9	6	14	18	18	22	20	59	44	19	11	8	6	6	7	5	3	7	6	8	15	11	6	10			500-600
OCT	9	4	13	13	8	9	10	29	17	17	13	10	8	8	8	3	3	7	5	5	5	9	9	8			>600
NOV	10	14	18	14	8	9	8	9	20	17	12	10	8	7	6	5	10	14	7	8	7	7	9	6
DEC	4	4	6	8	8	6	6	6	6	9	11	19	18	2	7	3	5	8	4	5	6	7	4	6
Number of intakes:			2	Length of the sampling period:						120	s	Unit:	0.01	µmol mol-1
month\time	0	1	2	3	4	5	6	7	8	9	10	11	12	13	14	15	16	17	18	19	20	21	22	23
JAN	10	5	7	9	17	5	6	6	6	11	19	8	9	5	3	5	6	5	6	4	3	4	2	6
FEB	2	2	1	2	2	3	3	4	13	8	5	4	4	6	3	2	3	1	2	3	3	3	3	2
MAR	2	5	4	5	4	3	4	8	5	6	9	5	4	3	4	3	3	2	3	3	3	3	2	3
APR	20	10	19	9	7	13	19	25	17	13	14	12	13	9	7	5	4	3	4	9	5	8	7	12
MAY	27	14	7	11	18	26	60	25	19	16	21	19	21	20	20	13	11	7	7	15	10	28	17	45
JUN	14	11	13	14	32	24	35	22	18	19	22	29	21	23	19	16	8	8	5	5	8	14	12	13
JUL	54	27	35	22	28	53	71	31	28	20	22	25	15	22	17	15	6	7	16	9	15	15	26	22
AUG	28	12	18	14	19	46	58	58	24	13	11	20	11	11	9	7	10	10	11	6	8	9	8	11
SEP	8	10	11	18	19	23	36	50	38	22	10	9	7	8	8	5	4	6	7	12	8	12	10	15
OCT	13	5	17	12	9	8	11	29	22	12	9	10	10	5	9	3	3	4	5	7	8	9	9	8
NOV	10	11	11	11	11	14	11	19	17	18	11	9	5	9	8	5	8	10	5	10	8	7	13	9
DEC	5	4	4	6	19	9	4	11	6	11	14	20	24	6	3	3	6	5	4	4	5	3	4	3
Number of intakes:			2	Length of the sampling period:						150	s	Unit:	0.01	µmol mol-1
month\time	0	1	2	3	4	5	6	7	8	9	10	11	12	13	14	15	16	17	18	19	20	21	22	23
JAN	6	5	3	20	20	4	10	10	12	16	14	8	8	5	5	5	4	9	4	4	4	7	4	6
FEB	2	3	1	2	2	4	5	2	7	6	4	4	5	6	2	3	3	3	3	3	3	2	3	3
MAR	3	4	3	5	7	3	4	8	7	8	6	7	5	4	4	3	2	4	2	2	6	3	3	3
APR	6	10	13	10	11	17	21	25	13	12	17	18	9	9	7	6	5	4	5	5	7	5	6	12
MAY	20	7	17	28	17	16	45	24	19	18	18	19	21	18	22	14	10	5	6	13	18	22	22	42
JUN	19	9	13	10	20	19	55	24	19	18	16	22	22	22	22	18	10	5	5	8	11	12	15	20
JUL	52	46	37	38	25	45	63	31	26	27	28	19	22	24	18	11	7	7	9	7	11	20	20	31
AUG	15	12	19	31	12	60	47	46	32	17	17	17	9	11	10	10	8	10	14	5	21	9	14	11
SEP	11	14	12	17	33	25	20	32	27	23	12	10	8	7	7	7	3	7	9	10	9	20	9	22
OCT	10	5	12	10	9	6	7	40	21	11	12	11	7	10	7	3	4	4	4	4	5	9	7	9
NOV	14	7	15	8	6	11	13	12	22	36	14	10	8	5	4	13	11	9	10	8	8	8	10	8
DEC	5	4	5	9	11	9	9	6	15	7	13	29	15	4	8	5	5	6	3	3	4	5	4	2
Number of intakes:			2	Length of the sampling period:						180	s	Unit:	0.01	µmol mol-1
month\time	0	1	2	3	4	5	6	7	8	9	10	11	12	13	14	15	16	17	18	19	20	21	22	23
JAN	8	4	4	14	34	5	9	11	8	8	17	8	7	5	4	3	5	4	4	3	4	4	4	7
FEB	2	2	2	2	2	2	3	2	10	12	3	3	3	5	4	3	3	2	4	3	5	2	4	2
MAR	3	2	3	4	4	5	3	10	9	12	8	4	3	4	3	2	2	2	5	3	4	3	5	4
APR	14	14	12	5	14	9	13	34	15	17	13	11	11	9	10	11	7	5	5	4	4	6	6	36
MAY	41	6	16	9	7	20	43	27	23	22	18	23	17	28	19	17	7	6	8	11	38	58	52	46
JUN	10	10	11	12	22	42	34	35	17	28	25	31	22	24	21	16	12	6	5	7	7	9	11	17
JUL	43	19	30	18	35	86	95	33	26	18	30	21	28	29	20	12	9	6	5	10	15	16	27	47
AUG	21	10	17	30	41	25	49	57	36	13	18	20	15	14	13	10	6	10	14	6	14	20	9	7
SEP	14	7	11	12	29	19	23	71	33	20	13	10	9	8	7	5	2	4	7	9	8	13	10	25
OCT	5	6	8	15	10	10	11	22	27	17	13	12	9	8	7	4	4	4	5	5	8	13	8	6
NOV	18	12	21	16	5	18	9	12	20	24	21	8	8	6	7	7	14	9	8	10	11	5	6	6
DEC	4	4	3	6	6	4	18	13	7	22	14	12	17	4	13	3	5	5	3	6	3	3	6	5
Number of intakes:			2	Length of the sampling period:						200	s	Unit:	0.01	µmol mol-1
month\time	0	1	2	3	4	5	6	7	8	9	10	11	12	13	14	15	16	17	18	19	20	21	22	23
JAN	11	5	5	8	8	3	10	9	6	10	12	12	5	4	6	4	5	8	6	5	3	4	3	5
FEB	2	2	1	2	1	2	2	4	17	6	5	4	3	5	3	3	2	2	4	4	4	3	2	2
MAR	2	4	5	4	5	3	6	11	8	7	8	7	4	3	4	3	2	5	4	5	4	2	3	2
APR	11	12	14	5	20	8	12	28	14	14	14	14	13	13	9	7	5	4	4	6	5	7	8	16
MAY	39	16	12	10	6	24	23	25	30	27	24	23	24	26	25	23	10	9	7	13	29	20	19	37
JUN	23	20	14	9	34	23	32	24	22	28	24	25	16	31	19	15	14	8	4	7	8	11	20	20
JUL	14	28	31	49	14	98	75	28	27	24	23	27	26	24	27	17	11	8	5	16	15	21	21	25
AUG	11	9	10	15	38	33	52	65	28	15	12	14	14	13	8	9	17	14	10	13	8	18	14	14
SEP	8	10	14	14	26	11	28	38	42	24	16	11	11	10	8	5	2	6	9	9	11	11	11	25
OCT	9	7	8	10	12	8	9	12	30	15	12	12	11	9	11	3	2	5	5	5	6	9	9	6
NOV	16	13	18	9	16	10	13	15	20	26	17	11	6	7	6	5	13	7	8	9	8	10	9	7
DEC	4	3	3	5	5	18	13	5	8	10	15	16	21	5	5	3	9	9	3	3	8	4	4	3
Number of intakes:			2	Length of the sampling period:						225	s	Unit:	0.01	µmol mol-1
month\time	0	1	2	3	4	5	6	7	8	9	10	11	12	13	14	15	16	17	18	19	20	21	22	23
JAN	15	9	12	10	29	5	17	9	5	15	18	7	12	6	6	4	6	5	6	3	2	3	5	4
FEB	2	2	1	2	2	3	6	4	14	19	4	5	5	6	3	3	5	3	4	4	5	2	2	3
MAR	4	5	3	8	3	3	6	13	11	7	7	5	5	4	4	4	2	5	5	4	4	4	3	3
APR	10	13	13	10	8	12	16	42	31	16	14	14	12	12	9	5	5	3	4	6	6	11	7	12
MAY	38	11	22	6	15	18	45	30	22	27	20	27	21	25	27	12	14	9	7	15	30	28	9	33
JUN	20	20	12	18	20	30	59	21	20	19	30	30	24	24	22	19	17	9	4	6	7	11	11	17
JUL	35	12	24	37	31	69	71	35	28	31	23	27	17	25	23	15	13	5	5	10	15	25	24	36
AUG	9	11	10	22	15	41	50	76	20	21	15	19	15	11	9	9	19	16	18	14	8	24	8	6
SEP	24	16	19	24	15	22	9	31	56	16	18	10	9	9	7	5	3	5	8	7	19	21	13	16
OCT	6	8	12	15	12	8	24	19	33	17	12	12	10	7	5	10	4	6	5	5	6	8	26	5
NOV	16	12	17	11	31	13	14	10	17	32	16	8	9	6	7	11	7	7	6	8	5	6	12	11
DEC	5	8	2	9	21	3	13	13	7	12	17	15	28	7	6	3	10	5	4	3	8	6	4	3
Number of intakes:			2	Length of the sampling period:						300	s	Unit:	0.01	µmol mol-1
month\time	0	1	2	3	4	5	6	7	8	9	10	11	12	13	14	15	16	17	18	19	20	21	22	23
JAN	7	14	6	11	8	6	6	13	9	15	17	13	12	5	8	9	6	7	6	3	4	5	7	8
FEB	2	2	2	2	2	5	4	7	8	9	7	4	5	4	3	2	4	3	3	3	4	2	3	2
MAR	4	3	4	2	5	5	4	7	10	6	13	7	4	4	4	4	3	3	3	3	4	4	3	4
APR	43	10	39	8	20	19	13	32	17	17	27	12	13	14	12	8	4	7	4	6	8	13	6	13
MAY	33	11	26	11	22	26	55	33	27	25	26	21	27	29	19	24	14	7	11	25	30	21	55	30
JUN	27	15	24	19	23	19	44	36	28	38	27	41	22	27	32	24	15	7	4	11	11	15	19	28
JUL	25	15	25	44	19	50	64	33	27	30	25	31	24	25	21	12	9	10	11	9	25	21	23	75
AUG	10	12	27	37	41	48	47	45	48	16	13	17	15	18	14	8	11	11	9	10	12	14	17	8
SEP	20	14	14	13	31	42	16	49	64	33	19	15	11	14	9	7	4	6	8	12	12	17	23	7
OCT	6	12	21	12	13	11	11	29	23	16	17	11	13	8	8	5	8	9	8	5	5	5	13	8
NOV	12	15	21	16	10	19	17	23	28	20	33	11	8	8	7	8	9	19	8	11	6	6	11	21
DEC	6	5	4	13	7	5	8	20	6	16	17	22	20	4	5	6	10	15	5	6	12	3	5	8
Number of intakes:			2	Length of the sampling period:						360	s	Unit:	0.01	µmol mol-1
month\time	0	1	2	3	4	5	6	7	8	9	10	11	12	13	14	15	16	17	18	19	20	21	22	23
JAN	6	5	4	12	25	3	15	7	5	13	34	8	6	8	5	7	5	8	6	3	3	4	7	7
FEB	2	4	1	2	2	6	10	6	16	9	7	5	6	7	5	3	3	4	4	5	5	2	3	2
MAR	4	4	3	3	7	5	6	11	15	9	7	6	6	5	6	5	3	5	5	3	7	4	3	5
APR	17	10	11	24	11	18	21	33	18	22	19	18	14	15	15	10	5	7	5	7	8	8	24	19
MAY	18	12	38	13	15	15	41	44	27	24	26	22	28	25	29	21	16	16	10	22	10	75	31	62
JUN	29	24	24	19	14	32	87	30	24	36	26	39	28	27	23	23	21	12	6	14	8	14	22	20
JUL	43	33	64	68	31	118	59	42	32	32	33	34	18	26	29	15	11	13	7	17	27	23	55	32
AUG	13	6	16	27	24	51	40	53	27	19	15	18	19	18	12	9	16	22	37	17	12	22	7	36
SEP	22	19	13	44	31	17	23	49	41	30	15	14	17	8	10	11	5	12	8	12	18	12	15	8
OCT	11	11	20	33	11	12	14	23	49	22	11	13	16	15	15	6	9	16	6	5	9	11	9	12
NOV	14	15	18	14	13	10	18	19	21	26	27	11	9	8	8	8	18	9	11	6	9	13	17	20
DEC	3	4	5	6	11	9	11	14	14	11	18	25	40	10	7	8	9	4	4	8	7	8	7	6
Number of intakes:			2	Length of the sampling period:						450	s	Unit:	0.01	µmol mol-1
month\time	0	1	2	3	4	5	6	7	8	9	10	11	12	13	14	15	16	17	18	19	20	21	22	23
JAN	9	10	4	16	27	6	11	13	12	19	16	14	12	9	5	7	5	5	4	6	5	3	5	5
FEB	2	2	2	5	4	7	11	6	12	9	6	6	10	6	5	4	5	5	3	3	5	3	5	4
MAR	5	3	3	4	6	4	8	7	11	9	12	7	5	5	5	6	3	4	5	5	6	11	7	7
APR	32	31	11	16	24	15	20	33	17	23	28	19	14	13	17	9	6	8	6	10	10	11	17	18
MAY	13	18	40	24	27	43	65	27	33	31	32	30	27	31	25	21	13	14	13	22	30	57	23	104
JUN	34	15	28	35	16	34	119	27	22	38	33	28	32	38	27	25	23	16	9	14	12	14	20	29
JUL	54	23	91	82	62	85	95	43	36	33	29	32	31	28	37	16	14	10	17	30	32	36	26	75
AUG	15	14	21	48	99	71	41	76	33	23	18	23	19	17	14	10	14	24	14	12	22	19	22	19
SEP	28	11	15	23	37	28	26	80	36	32	19	25	20	14	13	12	7	7	7	17	13	19	19	14
OCT	7	24	16	43	13	12	24	39	38	22	13	18	15	16	12	7	6	9	7	8	9	17	11	9
NOV	25	26	19	18	6	22	22	22	35	22	27	19	10	11	9	17	13	16	14	13	13	9	18	9
DEC	9	9	6	10	5	14	20	9	6	10	24	22	35	8	6	10	9	5	6	10	8	7	5	7
Number of intakes:			2	Length of the sampling period:						600	s	Unit:	0.01	µmol mol-1
month\time	0	1	2	3	4	5	6	7	8	9	10	11	12	13	14	15	16	17	18	19	20	21	22	23
JAN	8	19	6	11	18	8	5	30	19	21	34	14	6	12	12	10	6	11	4	7	8	10	7	12
FEB	2	4	3	4	4	9	10	4	14	8	7	5	5	9	9	6	5	4	6	9	6	4	3	4
MAR	7	4	6	6	11	11	7	9	10	10	9	9	7	8	8	5	3	6	6	7	9	7	8	6
APR	35	23	23	17	43	19	31	52	32	23	18	21	17	15	18	11	8	7	9	11	20	14	17	36
MAY	45	8	31	29	14	18	116	40	33	28	39	32	28	37	44	31	21	13	15	44	39	57	70	87
JUN	56	21	64	58	99	43	86	33	30	36	27	32	38	35	25	22	29	15	11	16	13	26	21	24
JUL	92	51	73	37	68	142	173	50	55	42	38	36	29	41	31	28	23	18	18	36	39	33	59	46
AUG	31	19	25	29	93	39	45	87	46	24	25	26	22	20	15	14	23	73	14	8	9	25	26	25
SEP	27	12	38	64	34	46	43	88	42	36	22	25	20	16	13	11	7	10	20	27	21	18	26	40
OCT	13	8	18	16	10	12	26	26	57	25	25	18	19	18	15	10	12	11	7	9	9	17	9	8
NOV	44	20	27	38	31	18	37	30	46	33	22	25	18	10	12	20	17	17	15	16	11	17	19	28
DEC	5	6	6	9	9	19	17	15	9	22	40	19	34	11	9	7	11	5	8	9	8	8	12	6
Number of intakes:			2	Length of the sampling period:						900	s	Unit:	0.01	µmol mol-1
month\time	0	1	2	3	4	5	6	7	8	9	10	11	12	13	14	15	16	17	18	19	20	21	22	23
JAN	14	10	14	47	28	13	50	25	16	33	28	20	18	17	12	18	24	14	9	11	8	7	13	17
FEB	4	6	4	10	6	10	12	10	42	25	11	9	14	20	9	7	10	11	9	9	8	6	5	6
MAR	11	7	4	8	11	14	14	16	17	15	15	13	15	13	8	13	9	10	10	11	14	13	7	11
APR	45	39	52	34	185	52	63	85	31	24	25	32	24	19	22	13	11	11	13	23	17	25	39	49
MAY	33	23	44	19	37	77	146	48	29	28	40	37	46	43	41	45	28	22	31	50	53	42	92	55
JUN	55	34	70	52	135	77	78	54	35	37	45	44	46	40	34	32	26	24	8	32	20	32	34	25
JUL	50	52	140	56	111	181	155	66	66	50	51	34	42	49	45	37	31	23	16	32	42	50	72	92
AUG	27	42	51	177	83	72	142	95	99	30	31	26	29	23	24	19	25	40	40	17	26	25	33	20
SEP	48	30	49	55	81	50	57	123	83	46	28	23	19	26	16	18	15	8	34	52	21	39	42	17
OCT	15	23	52	39	11	36	38	28	68	47	31	31	23	15	18	16	20	20	23	15	17	42	17	35
NOV	40	38	34	22	25	30	21	51	54	60	32	26	19	16	20	27	34	41	21	14	13	10	17	41
DEC	35	9	11	15	37	20	32	22	16	49	35	51	32	12	19	12	16	11	10	8	11	15	14	15
Number of intakes:			2	Length of the sampling period:						1800	s	Unit:	0.01	µmol mol-1
month\time	0	1	2	3	4	5	6	7	8	9	10	11	12	13	14	15	16	17	18	19	20	21	22	23
JAN	34	27	36	36	64	22	114	48	44	54	63	48	46	36	36	42	39	32	28	17	15	25	22	37
FEB	17	20	12	17	18	43	25	47	59	63	31	27	31	19	23	34	30	28	25	27	25	16	29	19
MAR	16	27	19	31	21	34	34	54	53	44	40	28	21	21	24	30	16	24	23	19	29	20	22	33
APR	143	171	72	80	103	108	112	162	79	62	57	30	28	43	22	26	22	48	36	50	39	53	112	83
MAY	173	73	94	112	69	159	441	220	121	80	56	58	52	59	53	66	63	37	63	83	95	171	61	124
JUN	72	106	157	112	94	175	219	179	93	66	75	49	65	86	51	44	83	55	31	53	74	57	50	59
JUL	243	157	240	167	234	295	281	246	134	86	82	67	42	52	62	50	52	42	56	111	97	78	144	141
AUG	72	50	101	487	172	208	412	348	213	84	80	55	41	41	28	47	60	93	71	49	70	64	55	125
SEP	119	140	84	214	189	167	133	252	212	119	95	61	33	44	34	26	39	29	36	49	47	70	88	60
OCT	29	45	83	66	51	54	66	150	192	107	55	57	52	29	55	28	49	38	39	38	56	67	73	35
NOV	89	95	104	82	85	71	49	58	105	153	81	47	42	49	44	58	56	65	46	59	43	40	51	59
DEC	51	24	28	26	57	36	61	44	25	43	88	90	84	35	48	46	56	40	19	25	27	23	28	38
Number of intakes:			3	Length of the sampling period:						100	s	Unit:	0.01	µmol mol-1
month\time	0	1	2	3	4	5	6	7	8	9	10	11	12	13	14	15	16	17	18	19	20	21	22	23
JAN	7	5	6	14	16	4	14	13	11	19	18	14	8	5	4	5	6	8	4	7	6	9	5	9
FEB	3	3	2	4	4	4	6	5	8	11	5	6	5	7	3	3	4	4	4	4	4	3	4	4
MAR	5	5	6	7	5	5	7	9	9	8	8	7	5	5	4	4	3	4	4	5	7	4	5	6
APR	19	14	14	10	18	19	26	36	19	16	18	22	15	14	10	8	7	6	7	9	9	10	12	19
MAY	16	9	12	26	30	27	83	30	27	25	32	26	29	21	36	22	16	8	7	11	18	50	61	59
JUN	27	17	17	16	28	42	60	31	25	25	27	33	28	31	24	25	17	8	7	12	14	17	14	20
JUL	62	28	36	34	26	75	72	49	35	30	34	27	33	30	27	17	13	10	13	16	21	23	31	43
AUG	15	16	19	39	30	49	71	58	38	24	22	21	14	16	14	11	14	17	13	8	18	25	20	22
SEP	25	12	22	24	42	43	21	50	36	32	18	12	10	9	10	10	4	8	8	11	17	17	13	27
OCT	10	9	17	14	15	16	16	39	30	16	18	14	11	11	12	5	7	9	11	7	7	10	14	9
NOV	18	15	15	17	17	13	12	13	34	35	21	16	8	8	6	9	12	12	15	12	9	11	12	10
DEC	11	5	6	5	8	8	6	7	13	10	13	30	14	7	6	5	5	6	6	5	7	8	4	5
Number of intakes:			3	Length of the sampling period:						120	s	Unit:	0.01	µmol mol-1
month\time	0	1	2	3	4	5	6	7	8	9	10	11	12	13	14	15	16	17	18	19	20	21	22	23
JAN	9	8	8	13	38	6	18	15	6	16	29	16	9	6	7	8	6	7	6	5	4	6	7	7
FEB	3	4	3	3	3	3	5	7	11	20	4	5	6	8	4	4	4	3	5	3	5	3	4	3
MAR	5	4	4	4	8	9	7	14	11	10	10	7	4	6	5	5	3	4	4	5	6	5	5	6
APR	20	25	13	11	16	21	27	39	27	20	18	21	13	14	13	9	6	5	5	8	8	10	12	19
MAY	42	14	20	20	19	48	51	35	31	32	29	36	29	29	30	26	15	7	8	14	27	40	25	42
JUN	21	15	28	17	37	44	53	35	24	28	29	29	28	29	31	21	16	10	8	9	10	15	15	19
JUL	38	41	54	43	49	76	110	49	34	23	41	34	32	28	26	20	12	10	11	17	17	28	35	58
AUG	12	17	22	29	25	36	85	75	30	19	31	21	17	16	14	14	11	13	16	13	12	38	15	16
SEP	24	21	19	31	33	26	17	68	45	33	15	15	11	8	11	8	4	10	9	11	20	16	19	27
OCT	12	11	13	22	13	10	12	41	27	19	15	18	13	10	11	5	6	7	9	7	11	13	15	7
NOV	21	17	18	17	13	16	12	18	33	34	24	12	12	8	9	8	17	14	10	12	11	10	11	12
DEC	5	6	5	8	7	6	19	7	15	17	28	19	20	4	10	4	8	7	5	6	7	5	5	5
Number of intakes:			3	Length of the sampling period:						150	s	Unit:	0.01	µmol mol-1
month\time	0	1	2	3	4	5	6	7	8	9	10	11	12	13	14	15	16	17	18	19	20	21	22	23
JAN	11	11	9	11	15	9	17	14	10	16	21	13	19	6	7	6	7	7	7	5	4	5	4	7
FEB	2	3	2	3	5	4	5	7	16	14	7	6	5	6	4	3	4	3	3	4	4	2	4	3
MAR	3	6	5	6	6	6	9	10	17	9	10	8	5	6	6	4	3	4	6	4	5	6	5	6
APR	14	15	15	12	13	18	23	63	27	25	20	22	18	13	16	8	8	6	6	7	9	12	12	20
MAY	41	13	30	27	19	36	59	44	33	26	31	35	28	39	42	23	16	12	8	29	34	29	31	54
JUN	20	22	23	23	33	43	56	40	24	28	37	45	32	31	37	24	17	9	7	7	8	20	18	25
JUL	50	31	46	55	37	107	116	38	34	28	35	39	37	29	29	17	15	11	13	19	22	28	37	41
AUG	17	18	16	27	23	65	55	74	43	25	21	20	16	18	13	15	16	14	26	14	11	35	13	19
SEP	21	15	19	22	33	33	21	57	59	31	21	20	11	11	10	7	6	8	10	11	16	22	20	11
OCT	12	8	25	27	16	11	27	26	33	23	12	15	10	14	12	9	5	9	6	7	9	13	23	11
NOV	14	15	20	17	16	14	18	14	27	30	17	13	10	7	7	14	15	11	10	12	11	9	12	11
DEC	6	7	4	9	14	7	13	9	14	15	23	24	27	4	7	7	14	13	8	8	11	7	6	5
Number of intakes:			3	Length of the sampling period:						200	s	Unit:	0.01	µmol mol-1
month\time	0	1	2	3	4	5	6	7	8	9	10	11	12	13	14	15	16	17	18	19	20	21	22	23
JAN	8	13	11	21	21	7	16	16	13	17	27	13	11	9	7	10	7	10	9	5	5	6	8	9
FEB	4	3	2	3	3	8	8	5	22	17	8	6	9	8	4	4	4	3	4	4	5	4	3	5
MAR	5	5	6	7	6	5	7	15	12	11	13	8	7	6	7	5	4	4	5	4	7	4	5	5
APR	25	21	36	14	27	27	34	41	22	26	23	22	16	15	13	12	7	7	7	8	9	18	11	29
MAY	25	17	20	22	20	32	65	42	33	30	37	27	35	30	32	29	14	9	10	21	66	29	88	34
JUN	19	15	24	22	27	51	61	41	29	36	38	36	35	29	41	27	27	9	9	11	13	17	19	20
JUL	31	22	51	36	28	98	89	52	37	42	39	41	33	32	34	19	16	12	12	18	36	32	63	81
AUG	14	10	30	34	25	64	58	85	56	24	19	22	19	20	19	12	15	22	15	11	27	24	14	17
SEP	28	18	20	29	43	36	26	64	48	34	24	19	15	16	10	12	6	10	11	14	25	13	19	9
OCT	10	15	28	22	18	14	17	48	39	23	23	21	14	13	15	8	8	13	12	8	8	11	25	9
NOV	19	19	28	20	11	16	26	21	29	27	27	20	11	11	13	9	21	16	17	14	11	9	17	13
DEC	8	6	7	10	24	11	14	16	9	13	21	33	20	6	8	5	12	14	6	9	12	5	7	8
Number of intakes:			3	Length of the sampling period:						240	s	Unit:	0.01	µmol mol-1
month\time	0	1	2	3	4	5	6	7	8	9	10	11	12	13	14	15	16	17	18	19	20	21	22	23
JAN	10	6	16	19	27	6	16	22	10	25	31	18	11	10	9	8	5	11	7	5	6	6	6	9
FEB	2	4	3	5	3	7	12	5	18	19	8	11	7	10	6	5	4	3	4	4	5	3	4	3
MAR	7	5	4	4	9	8	10	13	16	11	11	11	7	8	7	5	5	6	7	5	9	5	7	8
APR	22	22	23	25	20	17	30	62	35	29	20	25	18	20	17	13	7	7	7	10	10	16	21	17
MAY	47	11	34	26	19	29	64	44	35	32	42	32	33	31	42	29	18	16	13	25	36	55	39	50
JUN	28	26	22	34	23	57	73	41	27	40	34	41	36	46	29	33	25	12	9	18	11	15	27	26
JUL	57	44	87	91	87	127	173	53	45	34	35	44	35	35	43	24	20	11	11	22	41	32	66	48
AUG	20	14	20	40	32	41	76	106	56	26	23	28	19	23	16	15	17	31	31	16	29	17	19	30
SEP	33	32	30	41	27	84	16	56	74	35	35	16	14	13	10	15	6	6	13	16	13	19	19	19
OCT	14	11	26	23	21	19	24	33	52	25	17	15	20	14	12	8	8	14	8	7	13	16	12	10
NOV	32	15	28	23	18	25	22	27	28	32	29	20	13	13	12	10	19	17	14	15	15	13	17	16
DEC	8	8	7	15	9	10	24	20	11	13	20	31	44	16	14	8	14	16	7	8	8	8	11	8
Number of intakes:			3	Length of the sampling period:						300	s	Unit:	0.01	µmol mol-1
month\time	0	1	2	3	4	5	6	7	8	9	10	11	12	13	14	15	16	17	18	19	20	21	22	23
JAN	11	11	11	26	32	7	14	18	14	30	29	20	18	13	11	10	9	8	7	7	9	5	6	9
FEB	3	5	3	4	5	7	9	8	12	18	6	8	8	9	5	6	5	6	4	5	6	4	5	4
MAR	6	6	6	9	7	5	9	11	13	11	15	13	8	7	7	6	4	6	7	8	8	7	7	7
APR	50	29	11	17	39	26	39	49	31	30	23	22	21	18	15	11	8	9	10	15	15	13	21	23
MAY	27	15	47	24	29	45	72	49	40	41	46	38	41	40	38	30	17	22	24	18	54	51	63	89
JUN	38	26	51	31	28	62	80	43	33	40	40	41	40	46	44	37	23	15	9	24	13	22	25	33
JUL	54	39	89	88	93	90	161	59	54	43	45	45	31	43	39	22	20	13	22	32	41	36	42	98
AUG	21	18	50	62	47	70	67	120	47	26	33	28	20	30	20	18	21	29	18	14	22	24	30	21
SEP	41	22	25	40	44	55	37	115	61	34	34	26	22	15	16	15	10	10	17	20	33	21	31	33
OCT	9	17	19	28	22	19	14	36	44	27	24	20	20	19	16	9	9	8	11	10	11	24	20	11
NOV	26	29	33	19	26	26	30	25	58	39	32	20	15	14	12	18	19	17	17	16	13	15	16	14
DEC	12	9	8	11	24	19	24	11	13	14	34	27	36	9	16	6	17	9	8	10	15	8	12	8
Number of intakes:			3	Length of the sampling period:						400	s	Unit:	0.01	µmol mol-1
month\time	0	1	2	3	4	5	6	7	8	9	10	11	12	13	14	15	16	17	18	19	20	21	22	23
JAN	13	28	9	21	62	12	25	23	19	28	36	23	13	14	12	12	9	13	8	8	7	12	9	13
FEB	4	5	4	5	6	13	10	6	23	17	10	7	10	9	8	7	6	5	8	7	5	5	8	3
MAR	7	6	5	9	11	10	12	14	17	14	16	13	9	10	10	6	5	6	10	9	13	7	11	7
APR	37	67	50	21	39	23	44	75	38	28	31	23	23	22	23	14	10	12	14	17	20	23	33	39
MAY	53	13	19	23	26	43	122	59	48	38	47	42	34	50	52	34	25	19	27	60	42	85	86	81
JUN	42	36	49	57	67	56	103	62	42	48	43	51	49	54	44	40	33	22	12	23	15	27	21	42
JUL	100	62	140	65	68	179	214	83	54	65	48	40	45	51	41	31	26	16	18	53	52	34	75	81
AUG	33	20	22	69	51	65	72	84	74	33	31	30	27	25	22	23	20	53	19	13	15	20	31	36
SEP	29	16	49	67	63	86	61	73	79	50	34	30	23	20	21	16	9	11	25	33	31	26	40	26
OCT	26	9	35	23	22	21	33	39	59	44	32	27	24	21	22	11	13	13	16	11	11	16	15	17
NOV	35	25	32	35	35	29	33	29	50	35	44	25	22	19	16	26	23	27	24	23	14	18	23	22
DEC	9	11	7	12	28	22	28	19	12	33	34	27	53	11	13	19	22	10	12	11	13	11	14	11
Number of intakes:			3	Length of the sampling period:						600	s	Unit:	0.01	µmol mol-1
month\time	0	1	2	3	4	5	6	7	8	9	10	11	12	13	14	15	16	17	18	19	20	21	22	23
JAN	26	12	22	39	46	14	61	52	25	53	27	27	27	23	15	21	21	15	15	19	10	9	14	15
FEB	5	6	6	10	10	9	28	12	44	21	11	9	15	21	10	11	13	13	9	10	12	8	8	8
MAR	11	10	8	14	12	12	19	18	18	17	18	16	12	11	13	16	6	10	14	10	21	12	9	17
APR	56	53	39	40	120	51	64	108	46	31	32	37	27	27	27	17	12	15	16	25	30	28	52	69
MAY	80	29	37	23	35	65	180	56	37	48	42	49	55	51	53	50	35	33	31	68	116	93	65	76
JUN	54	72	76	72	139	90	106	81	50	55	52	55	49	58	48	41	45	33	14	34	23	32	63	51
JUL	69	121	224	75	79	181	175	108	88	59	68	62	43	48	49	41	40	30	31	46	71	69	93	160
AUG	28	53	62	196	74	109	160	137	103	35	40	35	30	32	28	27	39	43	36	23	32	34	75	42
SEP	84	59	55	87	85	77	59	113	95	72	55	27	31	30	24	18	17	13	32	71	32	44	48	33
OCT	30	30	62	52	19	35	40	75	76	63	41	46	28	22	29	18	17	23	22	16	23	47	25	32
NOV	51	44	43	32	41	57	43	51	67	70	43	30	22	24	23	29	42	42	24	31	21	19	26	38
DEC	27	20	19	21	26	24	26	23	21	40	50	75	60	14	22	18	18	16	18	15	24	21	13	18
Number of intakes:			3	Length of the sampling period:						1200	s	Unit:	0.01	µmol mol-1
month\time	0	1	2	3	4	5	6	7	8	9	10	11	12	13	14	15	16	17	18	19	20	21	22	23
JAN	42	33	36	78	80	43	67	59	50	91	65	62	67	34	38	51	42	37	34	20	18	24	24	44
FEB	19	18	17	25	19	25	27	38	61	46	39	32	36	32	33	34	41	27	27	35	21	25	30	24
MAR	30	27	33	30	28	32	38	61	67	63	44	28	24	33	29	31	18	27	27	30	38	37	27	35
APR	119	155	90	79	193	119	222	153	109	61	69	48	36	42	38	34	32	44	41	53	49	60	128	201
MAY	115	66	92	127	68	104	544	198	125	105	85	66	60	74	70	90	67	49	74	140	83	149	105	118
JUN	87	86	166	129	192	168	236	150	91	89	82	59	72	103	80	58	81	55	38	58	77	80	66	93
JUL	220	262	333	189	232	275	345	373	187	110	72	83	50	74	72	57	65	56	68	78	123	133	159	254
AUG	117	88	111	396	391	179	389	442	202	87	88	73	59	53	40	56	83	122	75	53	63	57	85	82
SEP	206	69	100	211	107	259	169	230	237	150	108	72	48	47	33	29	46	33	59	52	66	69	119	65
OCT	29	44	87	104	76	65	110	142	230	100	80	65	50	37	47	32	56	45	51	39	51	67	87	47
NOV	127	102	106	75	125	100	49	79	105	152	102	59	44	60	42	59	75	86	50	69	48	53	47	69
DEC	66	37	32	59	54	42	73	55	28	47	111	89	116	38	55	56	58	47	33	23	26	41	44	48
Number of intakes:			4	Length of the sampling period:						100	s	Unit:	0.01	µmol mol-1
month\time	0	1	2	3	4	5	6	7	8	9	10	11	12	13	14	15	16	17	18	19	20	21	22	23
JAN	10	8	9	20	23	7	16	16	15	21	36	16	9	7	7	7	8	11	12	7	6	7	6	6
FEB	3	4	3	4	3	5	5	7	16	10	7	6	5	6	5	5	5	5	4	5	7	4	4	4
MAR	6	6	6	10	9	8	10	16	12	11	11	9	6	6	6	5	4	6	6	6	6	5	5	6
APR	18	23	15	17	21	19	28	42	25	20	23	26	18	16	15	12	8	6	8	14	11	15	15	17
MAY	67	29	27	33	17	59	68	32	35	30	36	34	35	39	32	23	18	13	9	19	40	35	26	34
JUN	20	22	22	27	39	56	60	41	29	35	41	35	40	44	30	28	21	11	7	11	16	22	34	24
JUL	64	44	66	50	31	145	135	44	40	38	41	50	45	40	40	21	19	12	14	19	26	36	50	71
AUG	19	17	28	39	29	54	85	93	46	28	22	27	20	20	19	14	18	21	16	14	17	24	18	17
SEP	19	28	28	30	35	37	48	61	76	36	21	16	14	13	12	9	5	9	11	16	24	20	16	28
OCT	16	12	19	21	18	13	16	37	43	20	17	16	18	13	13	7	6	9	9	10	12	15	16	13
NOV	19	23	28	20	19	21	18	26	37	34	29	15	12	13	11	13	22	18	10	17	12	14	16	13
DEC	9	7	7	9	15	13	12	17	9	19	22	30	24	8	12	5	11	9	8	9	14	9	7	8
Number of intakes:			4	Length of the sampling period:						150	s	Unit:	0.01	µmol mol-1
month\time	0	1	2	3	4	5	6	7	8	9	10	11	12	13	14	15	16	17	18	19	20	21	22	23
JAN	14	12	8	21	31	8	15	21	16	23	29	17	16	10	9	9	8	12	12	7	6	9	6	12
FEB	3	4	2	5	4	8	9	8	20	15	9	8	9	8	5	4	5	5	5	5	6	5	4	5
MAR	7	6	5	8	10	9	7	15	17	12	13	11	7	7	7	6	5	6	5	4	8	5	5	7
APR	37	17	27	15	41	33	30	40	27	29	28	26	21	19	15	12	9	7	7	11	11	16	11	31
MAY	29	21	25	33	33	33	68	51	40	29	42	39	37	38	39	30	21	11	12	29	63	35	83	62
JUN	39	16	27	28	43	46	79	49	40	47	45	49	42	41	43	35	23	12	10	15	15	25	27	26
JUL	77	44	55	59	33	94	111	71	41	49	49	37	38	37	42	22	20	14	15	19	34	31	60	78
AUG	20	26	36	43	45	63	80	89	66	28	24	26	20	21	20	16	17	28	24	12	23	19	24	17
SEP	19	23	24	24	60	56	28	90	63	54	24	22	18	16	14	13	7	11	16	21	23	25	21	20
OCT	14	14	28	24	22	19	15	50	44	28	27	21	16	14	16	7	10	16	14	8	12	13	27	12
NOV	25	22	28	17	14	21	24	20	35	44	31	19	13	10	14	13	15	16	19	17	10	12	14	12
DEC	10	5	6	13	25	13	14	23	16	17	26	43	33	8	9	8	17	15	7	13	12	7	7	8
Number of intakes:			4	Length of the sampling period:						180	s	Unit:	0.01	µmol mol-1
month\time	0	1	2	3	4	5	6	7	8	9	10	11	12	13	14	15	16	17	18	19	20	21	22	23
JAN	11	10	9	26	36	7	18	17	14	25	32	10	14	11	9	9	9	11	9	5	6	7	7	10
FEB	3	4	3	4	4	5	13	7	23	15	9	9	8	10	7	6	6	4	5	5	6	4	4	4
MAR	7	5	7	6	11	9	8	13	13	16	17	11	8	8	9	6	5	5	7	4	10	6	5	7
APR	44	27	27	21	35	16	34	59	30	32	23	26	24	22	19	15	10	11	8	13	10	14	28	25
MAY	46	19	42	26	22	66	89	60	50	36	43	38	39	43	40	36	20	20	17	26	43	40	48	101
JUN	27	20	39	36	41	71	96	60	31	52	46	50	43	48	41	34	32	15	10	20	14	22	28	23
JUL	64	44	83	75	85	193	162	69	47	40	49	50	46	41	41	25	17	17	12	24	34	29	56	65
AUG	31	23	32	47	27	71	87	117	59	34	28	30	26	22	20	17	17	24	31	14	24	39	27	36
SEP	29	18	38	40	52	84	37	89	66	43	33	25	18	14	12	14	6	10	14	21	20	19	24	21
OCT	12	16	27	29	20	16	17	34	58	26	20	21	18	16	19	12	9	15	12	10	17	18	13	13
NOV	28	24	31	32	23	20	27	29	44	35	35	24	14	15	15	13	23	21	14	18	17	17	22	22
DEC	7	7	7	15	12	19	24	25	20	21	25	47	50	10	17	8	19	16	11	12	11	9	12	12
Number of intakes:			4	Length of the sampling period:						225	s	Unit:	0.01	µmol mol-1
month\time	0	1	2	3	4	5	6	7	8	9	10	11	12	13	14	15	16	17	18	19	20	21	22	23
JAN	14	15	12	19	48	11	22	21	15	35	29	19	20	11	11	12	9	8	10	7	9	6	9	11
FEB	3	5	3	4	7	9	14	11	25	17	7	11	9	10	6	6	7	7	6	6	7	4	6	6
MAR	8	8	7	10	9	6	10	17	16	13	15	12	9	9	8	8	5	6	9	9	9	9	7	9
APR	53	32	19	18	22	28	52	75	34	29	26	23	27	21	17	15	11	9	11	15	13	19	25	33
MAY	48	22	44	25	34	38	121	49	46	48	48	49	45	54	43	31	21	20	25	38	76	78	39	93
JUN	43	36	34	32	29	61	100	52	39	53	50	50	47	51	46	41	29	17	13	28	16	26	23	38
JUL	102	37	100	83	66	120	188	70	59	54	50	53	40	47	45	26	24	12	14	34	44	54	52	91
AUG	22	18	27	53	132	86	80	137	58	37	37	33	25	27	23	22	22	34	22	17	25	23	44	32
SEP	50	27	23	52	54	51	26	122	108	43	37	28	21	17	15	15	10	11	15	28	28	29	28	28
OCT	14	17	28	25	22	26	26	49	59	35	28	23	25	21	19	14	9	13	13	12	13	16	19	14
NOV	34	33	38	24	30	35	32	28	62	40	32	26	17	17	14	21	22	18	17	25	14	18	24	17
DEC	13	10	8	10	16	15	23	17	15	21	34	50	49	13	18	16	15	8	8	10	17	9	8	8
Number of intakes:			4	Length of the sampling period:						300	s	Unit:	0.01	µmol mol-1
month\time	0	1	2	3	4	5	6	7	8	9	10	11	12	13	14	15	16	17	18	19	20	21	22	23
JAN	14	23	10	32	80	13	41	28	21	37	35	28	15	14	16	16	8	10	9	11	9	12	13	14
FEB	4	6	4	5	6	15	13	8	24	22	12	10	11	12	8	7	8	5	8	9	7	6	8	5
MAR	7	7	9	7	16	12	13	14	17	18	14	16	11	10	10	8	6	9	10	10	13	9	13	8
APR	48	66	80	21	30	34	48	67	39	37	35	29	28	24	25	16	11	12	14	19	25	24	35	56
MAY	86	18	59	25	34	74	133	67	46	45	50	46	43	55	57	40	31	25	31	51	71	79	56	67
JUN	52	42	48	64	95	70	105	60	48	62	55	58	58	62	51	47	40	28	13	20	19	33	28	40
JUL	88	61	163	76	78	135	200	93	68	64	60	56	48	47	52	40	31	19	21	53	59	44	85	82
AUG	36	29	39	92	98	70	100	103	85	36	34	35	31	30	24	24	21	57	31	16	17	24	38	42
SEP	40	24	42	57	80	75	54	93	98	61	31	35	33	24	23	15	12	13	20	25	36	31	41	34
OCT	24	19	58	49	23	25	31	49	63	39	37	28	26	21	23	11	13	19	21	14	14	19	20	23
NOV	42	35	40	36	43	38	39	32	47	47	51	27	19	20	16	27	27	36	22	30	15	22	26	30
DEC	10	12	10	15	38	29	27	35	13	39	45	41	53	10	14	23	26	14	13	12	17	10	17	9
Number of intakes:			4	Length of the sampling period:						450	s	Unit:	0.01	µmol mol-1
month\time	0	1	2	3	4	5	6	7	8	9	10	11	12	13	14	15	16	17	18	19	20	21	22	23
JAN	16	16	21	51	62	22	62	32	27	53	42	33	28	22	16	25	24	21	18	20	12	11	18	24
FEB	5	6	5	10	13	9	19	13	52	27	13	11	16	20	11	13	11	15	10	10	14	8	7	8
MAR	13	13	9	12	15	18	20	23	23	20	22	17	15	14	13	17	10	11	14	14	20	16	13	16
APR	68	72	50	56	78	52	74	100	44	37	37	39	26	29	31	20	15	17	20	29	34	32	58	81
MAY	82	45	61	27	45	115	198	72	53	56	64	49	57	59	57	51	41	34	40	64	86	102	96	93
JUN	56	64	110	82	124	92	111	87	59	55	66	60	59	68	51	47	49	31	18	39	25	39	76	51
JUL	112	84	209	101	134	170	222	99	93	59	67	54	61	64	67	52	44	29	44	55	89	74	103	156
AUG	28	54	51	170	113	149	154	145	97	52	44	42	37	36	31	34	43	64	36	28	33	39	70	46
SEP	91	70	56	92	88	91	72	115	100	91	56	34	42	31	28	22	20	15	33	57	46	42	54	30
OCT	27	37	69	65	26	46	42	95	80	72	49	39	33	26	24	15	22	28	36	21	25	52	25	32
NOV	46	48	48	49	39	61	50	63	82	80	43	39	28	26	25	30	50	55	38	31	21	19	33	44
DEC	20	22	18	24	33	34	39	28	32	44	48	70	40	18	26	23	21	15	18	18	18	22	18	23
Number of intakes:			4	Length of the sampling period:						900	s	Unit:	0.01	µmol mol-1
month\time	0	1	2	3	4	5	6	7	8	9	10	11	12	13	14	15	16	17	18	19	20	21	22	23
JAN	50	37	39	89	72	50	83	72	44	95	54	64	59	39	41	57	48	38	35	21	20	30	29	41
FEB	21	18	17	23	19	39	27	43	69	52	38	29	34	33	32	36	40	27	28	39	32	20	33	23
MAR	21	31	40	33	30	31	44	78	59	47	39	35	29	33	31	32	20	27	24	36	36	40	31	36
APR	165	157	94	73	399	134	232	204	124	69	60	53	50	40	39	33	33	42	38	62	53	62	131	191
MAY	156	65	106	126	100	119	537	199	139	114	99	74	71	77	78	100	66	55	58	158	83	160	106	141
JUN	111	75	199	119	229	192	302	161	94	102	83	77	91	109	82	64	90	50	42	62	72	97	79	79
JUL	253	249	277	166	270	411	377	269	168	129	83	85	72	77	86	71	69	51	64	111	150	141	169	249
AUG	95	88	144	472	407	289	365	464	252	104	72	76	65	55	45	59	82	150	97	63	51	85	94	121
SEP	195	142	126	209	203	314	178	298	282	170	101	96	50	54	42	33	56	38	59	113	75	80	149	75
OCT	47	58	67	94	71	67	92	139	226	145	83	74	57	35	55	35	55	62	57	38	52	72	98	64
NOV	120	97	117	83	140	98	51	88	137	193	101	63	52	56	47	79	85	84	59	61	48	56	61	84
DEC	68	34	36	57	53	53	62	54	31	74	116	92	129	38	51	56	62	55	34	27	36	46	41	36
Number of intakes:			5	Length of the sampling period:						120	s	Unit:	0.01	µmol mol-1
month\time	0	1	2	3	4	5	6	7	8	9	10	11	12	13	14	15	16	17	18	19	20	21	22	23
JAN	14	15	11	20	18	8	18	25	19	26	31	18	14	11	9	11	10	13	12	8	9	9	9	13
FEB	4	4	3	5	4	9	8	11	17	20	11	9	10	9	8	4	5	5	5	5	8	4	4	5
MAR	9	6	8	10	9	10	7	18	15	14	15	11	8	8	8	8	6	6	7	5	9	6	5	7
APR	40	29	40	18	45	42	35	50	29	33	31	25	22	24	16	15	9	9	11	13	12	16	14	31
MAY	37	24	28	25	38	42	106	51	45	37	46	43	45	44	41	30	22	15	15	32	44	68	63	50
JUN	35	24	32	25	52	63	92	43	41	52	49	49	46	54	43	41	29	13	10	16	15	28	29	34
JUL	76	42	84	52	50	119	129	68	45	49	51	44	47	42	43	28	25	17	22	26	35	38	82	90
AUG	31	39	40	43	40	51	83	107	73	35	27	31	24	23	21	21	18	25	26	17	18	42	28	24
SEP	38	30	26	42	45	49	42	102	69	53	26	23	20	18	16	14	7	14	13	23	32	23	21	22
OCT	23	20	29	26	16	24	20	48	37	33	30	22	19	15	16	9	11	13	15	8	14	17	27	14
NOV	28	23	33	22	26	21	24	27	43	47	42	18	15	10	15	13	20	22	17	20	15	13	16	19
DEC	13	6	6	16	20	13	18	23	18	22	31	43	33	9	11	11	16	19	8	11	13	11	10	7
Number of intakes:			5	Length of the sampling period:						180	s	Unit:	0.01	µmol mol-1
month\time	0	1	2	3	4	5	6	7	8	9	10	11	12	13	14	15	16	17	18	19	20	21	22	23
JAN	14	13	12	34	46	12	21	24	19	32	38	19	19	13	10	11	10	10	13	10	9	8	9	9
FEB	4	5	6	6	6	9	14	9	20	20	9	13	9	9	6	7	6	8	5	5	7	6	6	6
MAR	9	7	7	11	12	9	9	20	22	14	19	15	9	9	9	8	5	7	8	10	11	9	9	9
APR	57	33	39	19	56	29	47	91	40	39	40	25	31	26	19	15	14	10	12	16	17	20	29	38
MAY	37	20	55	38	34	43	116	65	54	48	51	51	53	53	50	39	25	21	29	32	73	75	55	90
JUN	51	32	58	37	38	82	127	57	45	53	56	60	51	58	51	46	32	18	13	29	18	26	32	32
JUL	98	42	99	115	97	173	183	73	63	54	55	62	49	61	51	28	21	16	21	40	44	52	55	97
AUG	23	35	53	65	59	93	89	125	70	37	39	33	27	28	26	22	24	46	31	22	25	32	38	34
SEP	44	23	36	42	68	63	32	128	97	46	29	32	24	21	19	17	11	13	20	23	36	31	25	28
OCT	20	16	28	37	25	24	29	55	62	38	28	27	24	24	18	12	12	16	17	13	14	23	15	16
NOV	39	34	38	26	28	34	37	31	63	57	40	32	17	15	14	20	24	24	20	26	21	17	25	19
DEC	12	10	9	18	19	20	20	16	11	23	36	39	50	9	17	15	22	13	9	11	14	11	10	10
Number of intakes:			5	Length of the sampling period:						240	s	Unit:	0.01	µmol mol-1
month\time	0	1	2	3	4	5	6	7	8	9	10	11	12	13	14	15	16	17	18	19	20	21	22	23
JAN	15	22	10	33	81	14	24	30	23	34	41	20	17	17	16	15	8	14	8	11	10	14	12	15
FEB	4	6	5	7	7	15	16	8	27	20	12	12	12	15	10	8	8	8	8	8	9	6	8	6
MAR	8	8	8	10	13	13	13	22	18	18	16	15	11	12	10	9	7	11	11	9	13	10	13	9
APR	64	63	56	29	84	37	49	77	41	43	42	32	31	29	27	19	12	12	15	18	24	30	38	45
MAY	91	40	62	40	29	50	139	62	65	43	54	58	52	60	62	45	33	23	30	43	52	75	106	96
JUN	55	46	47	66	102	66	118	64	56	61	63	63	55	73	50	53	41	30	12	24	18	33	39	50
JUL	134	80	140	97	83	217	220	97	74	60	62	54	63	55	60	44	37	20	24	54	60	55	108	114
AUG	33	24	30	89	105	75	97	142	88	43	37	38	32	28	26	26	26	71	46	23	19	33	38	48
SEP	41	29	53	77	88	80	44	113	111	76	42	35	34	23	24	19	12	13	19	33	50	32	37	39
OCT	30	22	63	36	22	30	40	62	74	51	40	31	28	24	23	13	17	20	25	16	20	29	16	22
NOV	47	33	45	40	49	34	42	34	48	65	49	31	24	22	19	30	31	35	21	32	16	22	29	28
DEC	12	12	8	15	36	35	33	29	19	37	47	43	68	12	17	24	25	14	15	13	15	11	14	13
Number of intakes:			5	Length of the sampling period:						360	s	Unit:	0.01	µmol mol-1
month\time	0	1	2	3	4	5	6	7	8	9	10	11	12	13	14	15	16	17	18	19	20	21	22	23
JAN	23	22	27	60	69	18	64	68	27	65	54	37	27	22	20	24	27	21	13	17	11	11	19	24
FEB	7	8	7	11	13	9	20	13	46	24	16	17	16	24	12	12	15	18	12	11	14	9	9	8
MAR	16	14	9	19	14	13	23	28	24	21	20	16	14	14	14	17	9	12	18	14	19	14	11	20
APR	64	83	88	73	154	58	80	139	51	38	45	47	35	33	34	24	14	19	19	27	34	31	68	80
MAY	100	44	56	23	41	115	219	77	52	60	73	60	65	70	67	67	41	33	41	82	88	116	112	100
JUN	87	76	77	73	141	85	131	93	62	61	70	79	66	77	61	60	53	35	18	44	28	39	56	59
JUL	110	102	207	123	135	207	256	116	102	73	76	69	73	64	63	49	43	29	29	58	89	75	122	168
AUG	32	61	62	219	112	106	182	146	109	48	45	44	44	43	37	37	50	53	44	35	36	58	70	58
SEP	84	58	60	89	113	119	77	137	115	82	58	41	46	32	30	28	20	15	33	62	55	53	59	31
OCT	24	42	74	54	27	50	41	80	93	96	50	44	35	29	28	18	24	30	31	22	27	48	34	38
NOV	73	44	51	47	50	85	63	69	77	81	50	38	26	31	24	36	50	54	33	34	23	28	26	47
DEC	27	21	18	20	30	36	41	26	20	36	68	68	71	14	29	22	22	23	20	18	28	25	20	23
Number of intakes:			5	Length of the sampling period:						720	s	Unit:	0.01	µmol mol-1
month\time	0	1	2	3	4	5	6	7	8	9	10	11	12	13	14	15	16	17	18	19	20	21	22	23
JAN	51	39	45	97	94	53	88	66	61	94	71	68	64	45	44	63	52	33	36	23	21	30	32	57
FEB	22	21	19	20	23	36	40	46	57	55	37	35	37	38	32	36	40	28	27	38	29	23	36	25
MAR	23	29	41	33	32	32	44	71	61	47	43	37	28	33	34	35	23	28	29	36	36	40	36	39
APR	189	204	149	100	318	137	195	225	128	74	67	58	47	48	45	39	31	44	40	65	54	65	137	165
MAY	152	97	97	144	101	118	589	213	135	114	102	76	79	79	90	112	70	50	69	164	123	169	110	130
JUN	123	108	181	135	189	211	283	174	98	104	114	81	74	107	85	74	86	59	47	57	80	102	84	87
JUL	306	260	373	184	274	391	429	298	198	130	90	89	78	85	87	74	72	58	83	113	186	153	205	264
AUG	123	95	148	415	386	284	419	439	247	100	86	77	72	56	52	57	90	168	103	63	64	76	96	160
SEP	247	81	154	218	189	355	182	274	267	171	102	86	55	50	43	33	53	39	62	110	82	84	151	76
OCT	49	57	117	92	83	90	105	152	231	137	87	78	64	38	66	35	51	54	65	40	52	84	88	55
NOV	138	118	126	75	123	99	80	92	130	167	113	72	62	65	48	69	85	84	60	78	54	55	62	66
DEC	77	36	39	58	64	59	70	59	33	62	129	79	137	42	53	56	59	45	39	34	41	51	45	44
